# Supplementary material for: Genetic flow among olive populations within the Mediterranean basin
Source: PeerJ. 2018 Jul 11;6:e5260. doi: 10.7717/peerj.5260 (PMC6045921; doi:10.7717/peerj.5260)
Supplement: Supplemental Information 3 [file peerj-06-5260-s003.xlsx]

## Sheet: GD
1	129	4	42	4	50	33	1	129
Raw Data Check Statistics	DATA	Codominant Genotypic Distance	Pop1	Pop2	Pop3	Pop4
1	2	3	4	5	6	7	8	9	10	11	12	13	14	15	16	17	18	19	20	21	22	23	24	25	26	27	28	29	30	31	32	33	34	35	36	37	38	39	40	41	42	43	44	45	46	47	48	49	50
0
31	0
29	30	0
1	33	29	0
21	26	28	19	0
25	34	21	25	16	0
21	35	27	21	20	19	0
16	30	26	16	13	16	22	0
16	29	26	16	8	13	18	6	0
16	30	26	16	13	16	22	0	6	0
24	30	21	24	17	20	17	17	14	17	0
26	32	29	26	16	16	28	10	10	10	21	0
21	33	25	21	23	23	24	15	18	15	24	21	0
24	30	25	24	17	15	26	13	13	13	22	15	20	0
19	27	28	18	7	21	21	18	13	18	20	22	21	15	0
17	32	29	17	21	20	21	20	17	20	21	20	23	22	22	0
19	31	28	18	15	22	17	21	17	21	21	23	12	23	13	13	0
23	31	24	22	19	18	21	23	21	23	25	23	10	21	17	17	4	0
23	27	24	22	17	22	19	23	19	23	17	23	16	23	17	13	4	8	0
25	35	31	25	24	21	26	19	22	19	24	23	22	15	21	21	20	20	20	0
26	26	21	26	28	22	25	24	23	24	21	27	25	22	23	23	26	26	22	24	0
20	33	23	21	20	28	20	23	19	23	20	29	20	23	18	25	18	22	22	26	25	0
24	31	16	24	22	27	26	21	18	21	11	26	23	25	23	25	24	28	20	28	21	15	0
19	31	28	18	15	22	17	21	17	21	21	23	12	23	13	13	0	4	4	20	26	18	24	0
18	33	25	18	23	25	20	19	20	19	24	24	24	24	25	22	24	26	24	25	26	23	24	24	0
19	32	23	18	15	22	18	17	16	17	21	19	20	19	16	20	16	20	18	22	28	16	19	16	20	0
19	31	29	18	15	24	19	20	16	20	22	22	11	22	14	14	1	5	5	20	28	18	24	1	24	15	0
28	32	19	27	25	25	29	27	26	27	19	26	23	23	26	24	19	17	15	22	23	20	17	19	26	22	19	0
28	32	16	28	32	25	27	29	30	29	21	30	29	29	30	21	26	24	22	29	21	26	22	26	26	25	28	17	0
24	30	19	24	27	27	27	23	23	23	21	23	23	26	28	24	25	25	21	27	23	22	12	25	23	22	25	15	20	0
28	33	26	27	31	33	29	30	30	30	28	29	26	31	32	20	21	21	17	27	27	29	28	21	24	28	21	22	24	21	0
29	29	19	29	26	26	29	24	23	24	19	25	23	22	26	29	25	25	21	26	22	20	11	25	25	20	24	15	21	13	28	0
22	35	24	22	22	28	20	23	19	23	19	29	18	24	20	26	19	23	23	28	28	12	14	19	24	16	18	24	29	22	31	19	0
25	30	22	25	25	26	25	25	23	25	25	30	23	25	23	29	23	23	27	27	20	15	15	23	25	21	24	22	25	19	32	12	15	0
25	36	28	25	18	20	23	15	14	15	17	17	26	23	25	19	23	27	23	23	26	24	18	23	19	22	23	27	29	23	30	26	25	26	0
23	32	21	22	23	29	28	26	23	26	21	30	29	27	23	25	24	28	24	30	29	21	15	24	24	20	24	21	22	23	29	20	22	20	23	0
28	34	24	28	26	27	30	23	22	23	22	24	21	24	27	23	24	24	24	28	26	26	19	24	26	27	23	24	25	18	24	21	25	21	23	20	0
27	30	26	26	27	33	28	30	30	30	27	31	30	31	28	26	27	27	23	28	26	26	22	27	27	26	27	19	22	15	22	21	28	23	28	26	26	0
21	33	21	21	20	26	23	20	18	20	20	24	21	21	19	22	17	21	19	25	27	12	15	17	19	13	16	18	21	19	27	15	11	16	22	17	24	25	0
28	33	25	27	31	33	32	29	30	29	31	29	28	30	32	25	26	26	26	29	25	28	27	26	25	24	25	22	23	23	25	23	28	23	29	23	28	24	19	0
26	32	23	25	15	12	22	21	18	21	23	15	23	16	19	20	18	16	18	21	26	22	26	18	24	16	19	21	25	24	28	25	26	25	22	26	27	27	23	27	0
23	30	21	23	23	26	23	22	19	22	15	26	21	24	22	17	19	23	15	28	20	22	12	19	21	21	20	23	21	18	23	17	19	19	20	20	18	24	17	29	27	0
27	34	28	27	27	26	30	23	24	23	27	24	27	23	27	26	29	29	29	27	26	29	26	29	26	23	29	29	29	28	29	29	30	28	25	26	25	32	28	32	25	25	0
26	28	32	28	27	31	33	24	28	24	31	25	26	28	27	28	31	31	31	28	30	29	30	31	28	27	31	33	32	30	29	33	31	31	29	32	31	30	30	33	29	29	19	0
23	28	30	25	28	29	29	21	25	21	28	26	23	24	29	25	27	27	27	26	28	28	29	27	26	24	27	29	31	28	31	31	29	29	28	31	29	32	27	31	27	27	22	18	0
31	35	31	31	29	26	34	27	25	27	32	29	30	25	32	27	31	31	31	29	28	30	32	31	27	29	31	31	30	33	32	36	33	31	26	32	30	36	30	34	26	30	19	25	23	0
28	34	30	27	28	30	28	27	28	27	25	29	28	28	28	29	28	28	28	28	29	30	30	28	28	26	29	27	28	31	29	31	29	29	33	30	26	33	27	32	28	27	24	25	23	29	0
25	37	35	24	30	33	33	27	29	27	32	30	31	32	33	30	32	32	32	32	33	35	36	32	24	30	32	32	33	34	26	37	36	35	34	33	31	35	32	33	29	33	27	28	29	31	14	0
30	37	31	30	31	26	26	28	29	28	29	26	29	29	30	27	27	27	27	28	27	32	33	27	29	25	29	32	28	33	29	35	34	31	31	33	32	35	29	32	25	30	24	25	26	27	24	29	0
26	34	30	26	28	24	23	24	25	24	25	24	28	27	29	24	27	27	27	27	25	31	31	27	24	26	29	31	26	27	26	33	32	29	27	31	29	32	27	28	25	27	23	23	22	27	22	25	11	0
26	37	31	25	26	29	26	25	25	25	26	28	25	28	28	32	27	27	29	27	29	22	30	27	25	26	26	27	32	31	27	29	26	25	30	30	28	31	24	32	29	28	26	25	26	31	22	26	21	19
29	35	29	29	28	29	29	27	26	27	25	29	32	30	32	31	32	32	32	34	31	26	30	32	25	31	32	32	32	31	26	34	32	29	32	28	28	35	27	31	29	30	28	29	27	26	29	29	25	19
21	31	29	22	22	25	20	21	20	21	21	26	28	26	23	24	23	27	23	28	26	26	27	23	22	21	24	29	28	30	31	31	28	30	25	26	27	32	23	32	26	24	24	28	21	29	21	24	21	19
23	31	25	23	21	21	23	20	19	20	23	22	24	25	20	26	22	22	26	27	23	25	28	22	25	23	24	28	25	29	29	30	25	23	29	29	27	34	25	30	23	25	23	26	27	27	20	23	17	16
25	32	28	25	25	25	25	22	22	22	23	22	26	26	25	26	25	25	27	27	26	26	29	25	26	24	25	28	25	31	30	31	27	27	29	29	26	32	26	29	24	27	25	26	25	25	25	27	18	18
26	36	30	26	29	27	23	23	25	23	27	27	25	30	28	28	28	28	30	31	25	28	29	28	25	26	30	31	27	27	32	32	28	26	28	33	30	33	28	33	28	25	25	24	20	29	27	30	15	9
26	37	30	26	27	25	20	23	25	23	24	27	26	31	27	29	25	25	29	30	26	27	32	25	26	25	27	30	24	32	32	34	29	27	29	32	30	33	27	32	27	29	26	28	26	28	27	29	14	14
27	35	27	27	26	23	25	22	24	22	23	25	24	27	25	28	24	24	26	27	24	29	29	24	26	24	26	30	26	31	27	31	27	27	29	29	27	33	25	31	25	26	22	23	26	29	24	25	17	17
29	34	27	29	28	28	28	26	26	26	26	29	29	28	30	29	30	30	30	31	28	30	28	30	26	28	30	30	28	31	32	31	28	27	28	26	24	30	26	28	27	26	24	29	24	24	28	28	28	26
29	36	34	29	32	30	26	29	30	29	29	30	34	32	32	30	31	31	31	32	30	35	37	31	30	30	33	34	30	35	30	38	36	34	35	35	34	37	32	35	31	33	27	29	24	32	23	27	19	14
26	38	30	26	28	28	20	25	26	25	26	28	27	32	29	32	27	27	31	33	29	27	33	27	26	26	28	33	31	30	28	34	30	28	31	32	32	35	25	32	29	32	27	28	27	32	23	27	18	12
22	32	29	22	24	29	26	17	20	17	24	22	23	26	26	28	26	26	30	29	30	26	30	26	25	26	25	31	29	30	29	31	25	27	28	32	29	34	25	31	29	27	27	25	24	31	22	23	23	20
23	35	31	23	26	30	26	25	26	25	28	29	25	30	27	32	26	26	30	30	30	21	32	26	25	26	26	29	32	32	27	32	27	25	31	31	30	32	25	33	29	29	26	23	23	30	23	26	21	19
23	31	28	23	22	24	24	19	19	19	26	21	23	24	24	26	23	23	25	27	28	28	29	23	24	22	22	29	28	25	27	29	27	26	27	28	23	27	23	26	24	28	24	27	23	26	26	25	18	17
25	34	30	25	28	24	23	24	25	24	25	25	28	27	29	25	27	27	27	27	24	31	31	27	25	27	29	31	27	30	30	33	32	29	27	32	30	33	29	31	25	27	25	25	21	25	24	28	12	7
28	36	32	28	29	28	27	25	26	25	27	27	30	30	32	29	30	30	30	31	31	33	34	30	27	29	30	32	28	32	27	34	34	32	30	29	28	34	30	29	29	31	26	30	26	27	25	26	19	15
26	33	28	26	24	23	21	18	21	18	24	23	23	27	27	28	25	25	27	27	26	27	29	25	25	23	25	28	27	29	28	31	27	25	25	30	26	30	25	29	25	28	22	23	22	23	24	25	14	15
30	35	30	30	27	25	26	25	25	25	28	23	29	30	29	28	27	27	27	30	28	31	31	27	28	26	28	31	28	30	30	34	32	29	29	32	29	31	29	31	24	30	26	26	27	26	28	29	11	17
27	34	28	27	27	26	22	24	25	24	24	25	29	29	30	29	28	28	28	30	26	28	31	28	25	26	29	30	29	30	26	32	32	30	29	30	30	34	26	31	27	30	24	24	25	29	23	25	15	9
29	35	34	29	31	30	26	29	30	29	29	29	31	32	31	30	28	28	28	32	30	35	37	28	30	29	30	35	30	35	29	38	36	34	35	35	34	37	31	33	30	33	27	29	26	31	25	29	15	11
27	39	33	27	28	28	20	28	27	28	26	33	32	32	28	28	26	30	26	32	28	29	32	26	27	24	28	33	30	35	35	36	31	32	30	31	34	37	27	34	28	28	29	31	27	32	30	34	12	15
23	37	32	23	22	24	20	19	20	19	24	24	27	25	28	22	24	28	24	22	32	26	29	24	25	20	23	30	31	31	29	32	27	30	19	27	28	28	23	30	21	26	25	28	24	26	28	28	23	22
24	32	28	24	26	24	22	22	23	22	22	23	26	25	28	22	26	26	26	26	25	30	28	26	22	24	27	29	25	25	26	30	28	27	25	28	25	28	24	25	24	25	22	24	20	24	22	25	14	5
27	33	28	27	26	25	21	22	23	22	22	22	27	27	29	26	27	27	27	28	24	31	30	27	25	24	27	28	26	31	27	30	29	28	27	28	25	30	26	28	26	27	22	24	23	30	21	24	18	15
19	32	30	20	22	25	21	21	21	21	22	27	27	26	23	25	22	26	22	27	28	26	28	22	23	21	23	30	29	31	32	31	27	30	26	27	30	34	22	31	25	24	25	26	21	29	25	28	20	18
27	35	32	27	27	29	24	25	25	25	25	29	29	30	30	31	29	29	31	33	29	31	33	29	27	27	29	33	32	34	33	35	30	30	31	32	29	33	29	33	29	31	26	31	23	25	29	29	22	20
25	36	29	25	28	28	23	25	25	25	27	29	28	29	29	27	27	29	27	30	27	27	31	27	23	25	27	32	29	31	29	32	27	28	29	28	27	29	24	29	28	27	27	28	28	30	29	28	22	19
23	32	30	23	25	27	26	20	23	20	29	27	20	26	25	31	23	23	27	27	27	27	31	23	26	23	22	30	29	30	31	25	27	22	29	29	27	32	23	27	25	28	25	26	23	29	29	27	22	23
21	35	27	21	24	27	21	23	23	23	26	29	25	28	23	27	23	25	27	30	27	21	28	23	24	22	24	30	29	28	29	30	20	22	29	27	27	29	21	30	26	27	28	30	28	32	28	28	25	22
26	31	29	27	28	27	24	23	25	23	24	25	27	28	29	26	28	28	28	29	27	29	29	28	25	27	29	30	26	29	29	31	28	26	28	30	26	26	26	30	27	24	24	22	20	29	24	27	20	17
26	32	27	26	27	24	26	25	25	25	25	26	27	24	25	27	25	25	25	27	23	30	30	25	24	27	27	28	26	30	30	31	31	28	31	29	28	32	25	31	24	25	24	28	24	24	20	21	19	19
27	33	27	27	25	23	21	23	23	23	24	24	27	28	25	27	24	24	26	26	24	27	29	24	27	26	26	30	28	30	27	32	27	23	28	31	26	28	28	33	25	28	24	25	27	30	22	26	15	16
29	36	30	29	31	27	24	29	29	29	30	29	28	30	29	28	26	26	26	30	26	32	33	26	28	27	28	32	28	32	30	34	31	28	33	32	29	28	28	30	26	29	26	27	27	29	27	30	7	14
21	31	27	20	20	23	24	20	20	20	24	24	21	24	20	25	19	19	23	26	25	25	29	19	23	23	20	25	26	27	25	30	26	24	28	26	25	29	23	26	23	25	23	25	21	23	20	19	20	16
28	37	29	28	29	27	23	26	27	26	30	30	28	32	28	31	27	27	31	32	26	29	34	27	29	28	29	34	29	33	30	36	29	25	32	34	29	31	29	35	29	30	28	28	29	32	26	27	19	18
23	33	29	22	25	27	25	23	24	23	27	25	25	26	24	27	24	24	26	28	25	29	29	24	25	23	25	29	29	28	26	30	28	26	29	29	27	29	27	31	26	26	21	23	22	30	23	23	16	11
22	32	26	23	24	26	22	24	22	24	23	29	26	28	23	27	24	26	28	31	25	22	28	24	26	24	25	30	28	30	32	33	22	24	29	27	24	31	25	32	26	25	26	28	27	28	29	31	27	26
24	30	29	25	26	24	22	23	24	23	25	24	26	25	28	24	25	25	25	26	26	29	31	25	23	24	26	30	27	28	26	32	30	28	26	29	27	29	25	26	24	28	23	22	17	23	23	25	12	5
25	34	28	25	27	24	24	23	25	23	24	26	28	27	27	27	27	27	27	27	26	32	31	27	25	27	29	30	25	31	30	31	32	30	30	30	27	32	27	32	26	26	25	25	22	28	23	25	19	14
25	33	27	26	27	28	24	23	25	23	29	29	22	29	26	30	24	24	28	30	27	25	31	24	26	26	25	31	29	30	32	33	25	24	30	31	30	32	23	29	28	27	29	25	20	26	27	28	20	21
27	34	32	27	30	28	23	27	28	27	27	28	32	30	30	28	29	29	29	30	28	34	35	29	28	28	31	33	29	33	28	36	33	31	33	33	31	33	31	33	29	31	25	27	24	31	21	25	18	13
25	37	30	25	29	30	26	26	27	26	29	28	25	30	28	31	26	26	30	33	31	27	31	26	28	28	27	32	30	31	28	32	25	24	32	29	27	31	25	31	29	30	28	28	30	32	26	27	19	20
29	36	28	29	31	26	24	26	28	26	27	27	28	28	30	25	29	29	29	28	26	32	29	29	28	27	31	31	23	29	28	31	29	26	28	29	24	27	28	32	26	24	22	23	23	28	22	26	16	15
27	35	27	27	28	23	23	23	25	23	27	23	26	24	27	25	27	27	27	26	25	30	28	27	25	24	29	30	24	27	28	28	29	25	26	28	25	29	26	30	24	22	21	21	23	28	22	25	16	15
24	36	30	24	25	22	18	22	23	22	23	28	29	26	26	21	27	29	27	24	27	30	31	27	23	22	29	32	25	28	28	34	30	29	27	28	26	29	27	28	25	27	26	29	24	29	25	28	19	11
28	36	30	28	29	24	22	26	27	26	27	25	30	28	30	25	29	29	29	28	27	32	33	29	25	26	31	32	25	28	26	34	32	29	29	30	26	29	29	26	25	29	25	25	22	27	23	26	17	9
24	35	27	24	24	21	25	18	20	18	23	20	24	25	29	23	28	28	28	26	28	31	27	28	22	25	28	29	26	25	24	28	27	29	24	29	25	32	27	28	24	26	20	20	26	24	22	20	25	19
28	39	33	28	29	27	31	24	25	24	26	24	31	28	35	23	34	34	34	30	33	35	32	34	25	29	33	32	29	31	28	33	32	34	26	31	28	34	30	29	27	30	27	29	27	28	26	24	27	23
29	36	28	29	26	21	25	23	23	23	24	23	30	29	30	23	29	29	29	29	25	32	29	29	25	28	31	31	24	30	31	32	32	28	24	30	27	34	29	32	23	25	20	23	26	21	23	25	24	20
28	36	31	28	26	24	24	23	23	23	26	25	25	26	32	28	28	28	28	28	29	29	30	28	24	26	27	31	33	30	30	30	28	29	26	32	29	34	26	31	26	30	28	28	27	26	28	26	23	22
30	38	34	30	28	26	30	25	26	25	31	25	32	28	35	26	33	33	33	31	32	33	35	33	22	29	33	35	32	32	27	36	35	33	23	33	30	34	31	31	27	33	27	27	30	24	29	26	23	21
30	37	32	30	28	26	27	23	25	23	29	26	28	27	34	29	31	31	31	31	32	32	33	31	26	27	30	34	33	32	31	33	31	32	28	34	30	35	28	33	27	31	24	26	27	23	30	26	28	26
25	36	31	25	26	25	28	22	24	22	29	25	29	27	32	26	31	31	31	28	31	32	32	31	23	27	30	32	29	29	26	32	32	30	26	29	25	31	29	29	24	31	27	28	26	28	28	22	28	24
26	35	31	26	25	24	28	23	22	23	26	22	26	24	28	24	27	27	27	25	28	28	28	27	23	24	26	28	31	28	27	28	25	27	25	30	27	31	25	30	22	27	25	26	24	27	25	24	22	22
28	36	31	28	29	28	29	26	27	26	31	27	27	28	33	27	30	30	30	32	32	31	32	30	21	27	30	34	32	29	25	33	30	31	26	32	30	34	28	29	28	31	28	27	29	25	26	23	22	20
25	36	30	25	25	24	28	20	22	20	27	24	28	26	31	26	30	30	30	27	30	32	29	30	18	26	30	30	30	28	30	30	32	29	19	29	26	33	29	32	26	27	25	28	23	20	28	25	30	25
29	36	31	29	28	27	27	24	24	24	29	25	24	25	32	29	29	29	29	28	30	29	30	29	26	25	27	32	34	30	29	29	26	29	29	33	29	35	25	31	28	30	28	27	29	29	25	25	20	20
26	36	30	26	25	24	28	19	20	19	26	21	26	25	31	27	29	29	29	25	30	33	31	29	24	25	27	30	29	31	27	30	31	32	26	31	26	34	25	30	26	29	26	26	28	26	24	22	23	21
27	33	30	27	22	21	25	22	24	22	27	26	28	27	26	27	28	28	28	27	28	33	33	28	24	27	30	33	29	31	32	33	34	30	27	32	30	31	28	30	25	29	29	26	25	25	29	28	23	21
30	38	30	30	28	24	22	24	25	24	25	26	30	28	30	29	29	29	29	31	29	33	33	29	26	27	31	32	25	32	29	32	33	31	30	32	30	34	26	32	27	26	26	29	28	30	24	24	21	19
28	31	30	28	25	25	28	20	22	20	27	21	28	26	31	27	31	31	31	28	30	31	28	31	25	25	30	32	31	28	28	30	29	28	23	31	27	33	28	33	25	28	24	24	27	30	26	24	25	23
24	35	27	24	25	21	22	21	23	21	22	24	26	26	27	25	26	26	26	26	26	30	30	26	20	25	28	29	24	29	27	29	30	28	27	28	26	31	25	28	24	25	26	26	25	28	23	23	21	17
26	31	28	26	20	20	24	20	22	20	26	23	26	25	24	26	27	27	27	26	27	31	31	27	22	25	29	32	28	29	29	31	31	28	26	31	29	30	26	30	24	27	27	22	25	26	26	25	20	17
33	31	33	33	25	23	27	26	27	26	30	27	33	28	30	27	32	32	32	29	29	34	36	32	29	29	34	36	31	35	34	37	36	32	28	36	33	33	32	36	26	32	28	26	31	29	31	31	24	22
31	29	29	31	22	22	27	23	24	23	26	24	30	28	26	28	30	30	30	29	29	34	32	30	28	28	32	33	29	32	31	33	33	31	28	33	30	32	29	34	26	29	28	24	30	31	24	28	22	20
30	34	31	30	27	22	25	24	25	24	27	25	30	28	30	28	29	29	29	29	29	34	34	29	26	29	31	33	29	32	32	34	35	32	27	33	31	34	30	34	25	30	28	30	28	29	28	29	24	21
35	34	35	35	26	24	30	27	28	27	31	27	35	30	30	30	34	34	34	31	32	37	38	34	32	32	36	37	33	37	37	38	39	36	30	37	36	36	35	39	27	34	30	28	31	31	33	35	28	25
28	35	27	28	24	20	23	21	22	21	26	24	29	25	28	26	28	28	28	26	26	31	30	28	24	25	30	31	26	30	32	30	31	27	25	30	28	35	27	33	24	25	27	30	24	24	26	29	25	22
31	34	31	31	29	22	24	24	26	24	27	27	28	28	32	28	29	29	29	28	27	32	34	29	29	28	31	34	29	33	34	35	33	32	29	34	33	36	32	34	25	31	29	29	23	26	31	33	27	22
30	35	35	30	32	31	33	28	29	28	33	29	32	30	35	30	34	34	34	32	34	35	36	34	29	30	33	35	35	35	32	36	35	35	32	35	33	37	32	35	30	34	26	27	29	27	31	28	30	28
32	32	34	32	31	30	32	27	28	27	28	29	33	31	36	29	35	35	35	33	31	36	35	35	28	31	34	34	32	36	34	31	32	32	31	34	32	38	30	30	30	33	32	34	32	34	32	31	31	30
33	17	29	33	31	31	32	32	33	32	28	35	34	32	29	32	33	33	29	33	24	36	32	33	31	31	35	31	27	32	33	27	36	30	37	31	34	31	32	32	32	27	33	32	34	37	33	36	31	30
30	28	28	30	25	21	26	22	22	22	25	25	30	27	29	26	29	29	29	27	24	33	31	29	27	27	31	31	26	31	32	28	32	26	27	32	30	36	29	30	25	28	29	31	29	29	29	30	27	24
33	29	37	33	29	33	35	30	31	30	36	34	35	31	32	29	35	37	35	32	35	34	36	35	27	30	35	38	37	37	38	39	36	36	28	36	36	36	33	39	32	34	28	26	33	24	37	37	35	34
32	26	31	32	32	26	30	29	30	29	33	31	33	28	33	25	31	31	31	27	24	33	34	31	30	28	33	34	28	34	34	31	35	26	30	33	31	37	32	31	27	30	28	31	30	28	31	34	27	26
26	24	24	26	25	21	25	22	22	22	26	24	26	22	25	22	25	25	25	24	18	28	25	25	23	23	27	28	23	25	29	22	27	19	24	27	24	31	24	26	23	20	24	28	26	25	27	30	24	22
29	30	30	29	31	26	29	27	28	27	31	30	31	28	31	27	30	30	30	29	23	34	31	30	27	29	32	33	28	31	34	28	34	25	29	32	29	36	30	32	28	26	24	28	30	26	31	33	28	26
29	29	29	29	30	26	27	27	26	27	25	29	28	27	28	26	27	27	27	28	22	30	28	27	26	28	29	28	25	28	31	23	29	23	29	30	28	32	25	28	28	23	25	28	30	28	27	31	29	27
28	33	31	28	32	26	26	29	30	29	30	31	31	29	31	26	30	30	30	28	27	33	34	30	27	26	32	33	28	31	31	35	34	31	31	32	31	34	30	31	27	30	28	29	21	27	27	31	23	17
[truncated: 80 more columns]

## Sheet: PCoA
Principal Coordinates Analysis (PCoA)		4	42	4	50	33
PCoA via Covariance matrix with data standardization			Pop1	Pop2	Pop3	Pop4
Data Sheet	GD
Data Title	Raw Data Check Statistics
No. Samples	129	No. Pops.	4
Percentage of variation explained by the first 3 axes
Axis	1	2	3
%	11.8883	8.68099	4.92471
Cum %	11.8883	20.5693	25.494
Eigen Values by Axis and Sample Eigen Vectors
Axis No.	1	2	3	4	5	6	7	8	9	10	11	12	13	14	15	16	17	18	19	20	21	22	23	24	25	26	27	28	29	30	31	32	33	34	35	36	37	38	39	40	41	42	43	44	45	46	47	48	49
EigenValue	17.0226	12.4302	7.05161	6.12658	4.95954	4.58658	4.19524	4.15235	3.66193	3.53421	3.38134	3.26516	3.11478	2.76815	2.57865	2.5183	2.39619	2.3037	2.15674	2.08815	1.92122	1.83301	1.74525	1.70634	1.58528	1.54905	1.5072	1.48146	1.43917	1.37133	1.2926	1.25106	1.24109	1.16305	1.07226	1.06192	1.04159	0.995839	0.931001	0.92445	0.912598	0.866622	0.827866	0.80996	0.747221	0.722006	0.667487	0.661506	0.651537
1	0.382024	-0.172226	-0.24504	0.111752	0.0244631	-0.147608	0.359239	-0.165255	-0.0148252	-0.362124	0.204756	-0.177703	0.189779	-0.237233	-0.0577932	0.206665	-0.105944	-0.0936013	0.0616084	0.215583	0.137703	-0.224281	0.0393623	0.0421632	-0.0808105	-0.223918	0.106378	-0.152013	-0.014639	0.0460767	0.0384051	-0.207225	0.0097105	0.0961806	0.0188135	0.0213322	0.00417113	-0.0339063	-0.027411	0.0642849	0.0382283	-0.0678381	0.0804158	-0.00681021	0.0138688	0.0615097	0.0294085	0.0498723	0.0179901
2	0.32914	0.220264	0.445513	0.0379724	-0.105069	-0.0667119	0.278259	-0.386466	-0.306976	0.171968	0.231097	0.0391497	-0.447904	-0.42484	-0.0921346	-0.28722	-0.339516	0.0360977	0.0798616	-0.0536325	-0.117468	0.0637196	0.263261	-0.0420887	0.133319	0.163366	-0.0612726	-0.00543983	-0.158981	-0.0990841	0.0350443	-0.104101	0.0278203	-0.066966	0.0510521	0.0497942	-0.0649775	-0.0358737	0.203608	0.0464002	0.019624	-0.124231	-0.144715	0.0194488	0.0218009	0.126813	0.0333268	0.026402	0.0310388
3	0.4563	-0.0109919	0.333321	-0.360345	-0.0451312	-0.0928929	-0.226447	0.16873	-0.0928952	0.121994	0.0126416	-0.136208	-0.181627	0.1098	0.0763015	0.0480383	0.0578579	-0.0953635	-0.10196	0.00584772	0.198257	-0.094898	0.236341	0.0924591	0.128792	-0.124662	-0.200337	-0.258702	-0.202129	-0.204428	0.126778	-0.0756667	-0.198054	-0.129868	-0.055236	0.0704863	-0.0765998	-0.015427	0.0940719	-0.128525	-0.199872	0.0314016	0.159322	-0.0890212	-0.058561	-0.142471	-0.0530441	-0.185392	-0.0527625
4	0.400491	-0.177124	-0.257024	0.119809	0.0349171	-0.0964286	0.334918	-0.157286	-0.0282983	-0.354963	0.212526	-0.193521	0.209627	-0.22235	-0.0400562	0.196524	-0.0685911	-0.123594	0.0710287	0.241406	0.15685	-0.207486	-0.0270324	0.00350576	-0.0376736	-0.24989	0.130123	-0.106697	0.0164362	0.0547867	0.029478	-0.172015	-0.00670508	0.10648	0.0433666	-0.0099148	-0.0385109	-0.0512188	-0.0556583	0.00577624	0.043521	-0.104706	0.0669833	-0.0191637	0.00437839	0.0169532	-0.0430859	0.0135224	0.0264206
5	0.493735	0.0349186	-0.337655	0.429785	-0.0977053	-0.175474	-0.0844143	0.00430704	-0.171952	0.0371974	0.237431	0.0573875	-0.148937	0.0395473	-0.11196	-0.204843	-0.0490313	-0.131614	-0.00533202	0.0620707	-0.066461	0.0836584	-0.112166	-0.107206	0.232601	0.10751	0.182086	0.121678	-0.0596915	-0.0761311	-0.0502051	0.0395052	0.00774658	0.0150259	0.0148712	0.0137591	-0.0814702	-0.00683212	-0.00123563	-0.0686293	-0.00920636	0.0913848	-0.0556547	-0.0512271	-0.0378716	-0.0183143	-0.0483096	-0.0149681	-0.0376918
6	0.237041	0.195465	-0.0764887	0.39764	0.066707	-0.159194	-0.412552	0.179614	0.068223	0.15672	0.0603484	-0.0121038	-0.0632151	0.0734647	0.206658	0.0336261	0.270245	-0.11208	0.0687374	-0.00307513	0.0767871	-0.195995	0.0992947	-0.0537243	0.128061	0.0569794	0.0143577	-0.179695	-0.132446	-0.121627	-0.0279352	-0.148559	-0.0959047	0.0346942	0.068249	0.0547714	0.016156	-0.0734318	0.00910066	-0.0103402	-0.00944897	0.00359863	0.0663382	-0.0855887	0.136189	0.166152	-0.0430676	0.0662419	-0.0412459
7	0.197841	-0.197658	-0.00626284	0.32269	-0.0440169	-0.00202177	0.0369086	0.349803	-0.179755	-0.169673	0.0444905	0.0219664	0.31461	0.18477	0.0109553	0.105377	0.052126	0.0365604	0.00527663	-0.0583782	-0.0987807	-0.168108	0.319944	-0.11534	0.0950408	0.208851	-0.0470534	0.116915	-0.108478	0.139067	0.0557426	-0.081761	-0.0927422	-0.124005	0.0995727	-0.220234	-0.0876595	-0.108613	-0.00719333	-0.0205803	-0.033444	-0.0658824	0.0694157	0.00881064	-0.0721011	0.20354	0.0716912	0.0510627	0.0230273
8	0.314395	0.0848628	-0.441878	0.231378	-0.0236136	-0.443268	-0.203977	-0.104538	0.0340086	-0.0248092	0.0379138	0.0457107	-0.0114852	-0.295833	0.0418564	0.100021	-0.00557985	0.1595	-0.090203	-0.0113247	0.0540965	-0.0364905	-9.11817e-05	0.00996461	-0.0993953	-0.0387048	-0.0831747	-0.00610915	0.0924989	-0.0599324	0.0686346	0.0744789	-0.0509125	-0.02464	-0.0485491	-0.0179682	-0.0207385	-0.0810215	-0.0342244	0.0447287	-0.0116882	-0.0757186	-0.0481707	-0.00328297	-0.0725965	-0.0621499	0.00743603	-0.0399594	-0.0323055
9	0.457893	0.0401784	-0.4199	0.302594	-0.0441811	-0.38332	-0.196264	0.00916348	-0.0404736	-0.022419	0.0379348	0.0435045	0.0281973	-0.0860317	0.121053	-0.0594685	-0.111938	0.0177105	0.0788606	-0.00246184	-0.042657	-0.0415985	-0.0425094	-0.0455845	0.0498584	0.0276726	0.013147	0.0581659	0.0315546	-0.155078	-0.0153743	-0.0336432	0.0140673	0.0393906	-0.080492	-0.0466359	-0.055874	-0.0082675	-0.0723874	0.0601856	0.0660177	-0.041172	-0.0407017	-0.0647851	-0.101308	0.0625265	-0.0346421	0.0302751	0.0250789
10	0.314395	0.0848628	-0.441878	0.231378	-0.0236136	-0.443268	-0.203977	-0.104538	0.0340086	-0.0248092	0.0379138	0.0457107	-0.0114852	-0.295833	0.0418564	0.100021	-0.00557985	0.1595	-0.090203	-0.0113247	0.0540965	-0.0364905	-9.11817e-05	0.00996461	-0.0993953	-0.0387048	-0.0831747	-0.00610915	0.0924989	-0.0599324	0.0686346	0.0744789	-0.0509125	-0.02464	-0.0485491	-0.0179682	-0.0207385	-0.0810215	-0.0342244	0.0447287	-0.0116882	-0.0757186	-0.0481707	-0.00328297	-0.0725965	-0.0621499	0.00743603	-0.0399594	-0.0323055
11	0.444804	-0.0695584	0.0120076	-0.0109358	0.0871788	-0.315304	-0.258419	0.210301	-0.389487	0.0783009	-0.051476	-0.0919931	0.131392	0.170695	-0.0538984	-0.00890887	-0.213161	0.0478846	0.147963	-0.134958	-0.0271123	0.0020194	0.0284731	-0.0713089	-0.111817	0.287856	0.00660635	-0.0336435	0.101029	-0.0195029	0.114418	0.0414129	-0.0210242	0.0538852	0.0633196	0.16505	-0.0509653	-0.0918873	-0.00717096	-0.00852519	0.100208	-0.10476	0.14818	0.114236	-0.0261825	-0.0688954	0.0258843	0.0563441	-0.017553
12	0.260624	0.139726	-0.371029	0.187344	0.172439	-0.219974	-0.429518	-0.132834	0.05061	0.286725	0.0202066	0.206474	-0.0752068	-0.212524	0.151276	-0.0119123	-0.0130087	0.00113682	-0.0492031	0.0227609	0.0148127	0.0454451	-0.076738	0.0148678	-0.0229346	-0.0325048	0.0158602	0.124646	-0.1429	-0.093997	-0.134277	0.0265276	-0.030573	0.00168102	-0.176064	-0.0593894	0.257603	-0.0868924	-0.0442384	0.00185153	0.134697	-0.107204	-0.0241963	0.0554945	-0.049437	-0.100698	0.126416	0.0292763	0.0588637
13	0.51921	-0.142244	-0.234674	0.131418	-0.13592	0.252011	-0.0301234	-0.156898	0.190319	0.0127035	-0.220397	0.00279869	-0.139351	-0.1326	0.0136407	0.241776	-0.0237298	0.232988	-0.141833	-0.214999	-0.107034	-0.0788705	-0.00522052	0.113305	-0.0906786	-0.0287568	-0.170185	-0.190109	0.112849	-0.0259441	0.0831089	-0.0287127	-0.19262	0.031147	0.106483	-0.118086	0.0859264	-0.126357	-0.0249671	-0.173596	-0.0119447	0.0235424	0.0373297	-0.00222022	-0.0132648	-0.0464486	-0.121194	0.0654407	0.0194342
14	0.446155	0.136842	-0.173016	0.218824	0.111563	-0.249139	-0.196099	-0.161953	0.143226	0.0973908	-0.0395881	0.153479	-0.231122	-0.099981	0.152087	-0.119367	0.253594	-0.231381	0.0363442	-0.16642	0.0428462	-0.244871	-0.0594086	0.105537	-0.105932	0.0842203	-0.131775	-0.0477526	0.0269153	-0.0581128	0.0951195	0.0134309	0.200736	0.0339987	0.130657	-0.049865	0.0133846	0.180354	-0.0639607	-0.139357	-0.115993	-0.058885	-0.137802	0.0376445	-0.0485056	0.0253884	0.0742393	-0.0220921	0.0207515
15	0.578746	-0.159482	-0.067446	0.477869	-0.211932	-0.065536	-0.0432705	-0.134383	-0.0788919	-0.0816459	0.193094	0.0198017	-0.149099	0.0319101	-0.104579	-0.12416	-0.0542774	-0.282587	0.00643622	0.0558562	-0.09031	-0.061647	-0.159811	0.00618174	0.107761	0.125094	0.195749	-0.00269652	0.0652958	-0.0250886	0.0258854	0.0919539	0.153427	-0.0900776	0.130635	-0.0336776	-0.0461219	0.0904873	-0.0508772	-0.0571238	-0.125925	0.0957062	-0.0239615	-0.045897	-0.0776711	-0.0849512	-0.0199997	0.0233992	0.013222
16	0.45198	0.0770802	-0.0226881	0.24958	0.401409	0.1695	0.0778793	-0.0034066	0.137572	0.0903483	0.186303	-0.0227601	0.361018	0.00716716	0.0827598	0.11309	-0.168671	0.0482347	0.247632	0.0800789	0.0384277	0.0876577	0.0790777	0.20567	-0.0888069	0.0169669	0.0848412	-0.0493389	-0.0153366	-0.0786509	-0.0980005	-0.0908128	0.177666	0.0701797	-0.0584726	-0.0543573	0.039201	-0.0133528	-0.0505834	0.0310625	0.00242317	-0.0392724	-0.0720224	-0.127346	0.114417	-0.0103436	0.100235	-0.0480634	0.030668
17	0.648685	-0.280568	-0.0877135	0.462466	-0.0102783	0.519611	0.0741554	-0.0114162	0.0389634	0.0302563	-0.0520359	-0.0905893	0.0810505	0.0838767	0.018294	-0.00256115	-0.0800055	0.111231	0.00581112	-0.0344815	-0.0890448	0.0931912	-0.0567177	0.0173579	0.0195642	-0.0198193	0.0292013	0.0278172	-0.0094209	0.0247594	-0.0407415	-0.0174066	-0.0187188	-0.00717208	0.00484044	0.0447323	-0.0174504	-0.0176357	-0.00972853	0.0535719	-0.011898	0.0130516	0.00206748	0.000699318	0.0135592	0.00219182	-0.00476121	0.00135204	0.0237736
18	0.56384	-0.233283	-0.0271929	0.373019	-0.0129276	0.602736	-0.0651293	-0.0806084	0.103825	0.179069	-0.0982753	-0.143529	-0.096708	0.00109733	0.0909283	0.073101	0.0940975	0.0969466	-0.020812	-0.0479119	-0.0692627	-0.011449	0.00973659	0.0196695	0.0705765	-0.0380172	-0.0184476	-0.0355315	-0.0764423	0.00947154	-0.036527	-0.0807294	-0.0962584	0.0482954	0.0903202	0.0637813	0.080844	-0.0188463	0.0385679	-0.0635086	-0.114764	-0.00918853	0.0262218	-0.0283127	0.0293373	0.0200485	-0.00188451	0.0124142	0.0170135
19	0.673676	-0.174449	0.090798	0.324671	0.250304	0.483112	-0.00774385	0.04437	-0.0620213	0.155237	-0.0261979	-0.057355	0.0473843	0.0817834	-0.0687117	-0.0736689	-0.183376	0.14571	0.0276551	-0.125517	0.0434455	0.0330056	0.011252	-0.121806	-0.0403396	0.0226001	-0.00137557	-0.02595	-0.0661088	-0.0295675	0.0318504	0.0482501	-0.0186238	-0.0502025	-0.0397925	0.064891	-0.0704115	0.0538252	-0.0347923	0.0275252	0.0599325	0.00804491	-0.0166028	0.0191989	0.0764812	-0.0187583	-0.0418753	-0.0106972	0.0383174
20	0.388922	0.0889146	-0.0560992	0.253948	0.228999	0.0591811	-0.064589	-0.127314	0.153096	0.11145	-0.0334807	0.143197	-0.0618322	-0.0948825	-0.0240605	0.0570436	0.416208	-0.0541383	0.172589	-0.114594	0.126156	-0.0890312	0.0294134	0.0116967	-0.32695	0.0453217	0.0379101	0.0309098	0.273151	0.314849	0.122488	0.202688	0.161505	-0.0869429	0.068942	0.102962	-0.131351	0.0927141	0.213851	0.0957299	-0.210767	-0.0224923	0.13915	0.0887736	0.00896673	0.111594	0.01269	-0.075909	-0.0491835
21	0.306365	0.0225893	0.476252	-0.0443777	-0.0145838	-0.114	-0.151267	-0.0335995	0.00563626	0.032744	-0.0385076	-0.0606303	-0.1375	-0.115078	0.196587	0.103836	-0.0497038	0.0238564	0.296254	-0.0059639	0.190122	-0.267034	0.23841	-0.114755	-0.0413561	0.150296	-0.0461193	-0.0730819	0.260932	0.0543634	-0.159122	-0.141524	0.157085	-0.229833	-0.035553	-0.0665818	-0.100916	-0.00790446	-0.262704	0.00637681	0.0118371	0.227073	-0.0712362	-0.0204397	0.0504916	-0.163469	-0.105103	0.0308015	0.114427
22	0.663331	-0.247773	-0.0679373	-0.129874	-0.292384	-0.0734581	0.245227	0.121885	-0.117997	-0.143596	-0.0775068	0.164352	-0.14392	0.326416	0.0155687	0.12338	0.11593	-0.143909	0.0574647	0.0992368	-0.0953181	0.00288912	0.100358	0.0423514	-0.125302	0.0327136	-0.0313221	0.0214044	-0.0675813	0.00496434	0.00789635	-0.016924	0.101613	0.0821695	-0.0209148	-0.0887292	-0.0320463	-0.0390628	0.0158879	0.11796	0.036011	0.128295	-0.076013	0.122394	-0.159988	-0.04499	0.0464881	0.0397592	0.0226039
23	0.761379	-0.0502852	0.159576	-0.422796	0.0186173	-0.329795	-0.151451	0.185421	-0.117968	-0.0560773	-0.115976	0.143468	-0.014147	0.179788	-0.0917908	0.0552617	-0.272257	-0.0346199	0.000923406	-0.049534	-0.0561378	0.0416064	-0.0316364	-0.069944	-0.00753136	-0.10736	0.00371995	-0.0754919	0.0849355	0.00457426	0.0487424	0.019457	-0.0283824	0.0206309	-0.0140572	0.0847242	-0.130462	-0.0755577	-0.0263976	0.0660459	0.0785065	0.00380798	0.104938	0.0607565	0.0455427	-0.0364412	-0.0604405	-0.0342679	-0.0136397
24	0.648685	-0.280568	-0.0877135	0.462466	-0.0102783	0.519611	0.0741554	-0.0114162	0.0389634	0.0302563	-0.0520359	-0.0905893	0.0810505	0.0838767	0.018294	-0.00256115	-0.0800055	0.111231	0.00581112	-0.0344815	-0.0890448	0.0931912	-0.0567177	0.0173579	0.0195642	-0.0198193	0.0292013	0.0278172	-0.0094209	0.0247594	-0.0407415	-0.0174066	-0.0187188	-0.00717208	0.00484044	0.0447323	-0.0174504	-0.0176357	-0.00972853	0.0535719	-0.011898	0.0130516	0.00206748	0.000699318	0.0135592	0.00219183	-0.00476121	0.00135204	0.0237736
25	0.252246	0.0747885	-0.157388	-0.142515	0.167774	-0.108909	0.205501	0.0838354	0.0287312	-0.271248	0.167046	-0.0940806	0.0592235	0.0170058	0.033764	0.116817	-0.0289805	0.0141926	0.0206447	0.131725	0.188493	-0.0985048	-0.081811	-0.143609	-0.0997629	0.0218255	-0.286235	0.210045	-0.13738	-0.0700036	-0.157038	0.105077	-0.162733	-0.229364	0.223625	-0.197371	0.211519	0.100876	0.175675	0.00251696	-0.207809	0.0348999	0.0662493	-0.0398604	0.0744961	0.0942918	0.0870104	-0.021192	0.0622544
26	0.497683	-0.0952003	-0.125502	0.141455	0.0149119	-0.0686383	0.110393	0.0800773	-0.0115812	-0.118191	-0.0698461	0.197126	0.0639035	0.0534649	-0.0182828	-0.0823623	0.102366	-0.271644	-0.200241	0.106567	0.0517789	0.118867	0.00663152	0.168551	0.0786981	-0.0161566	-0.0334234	0.0607005	-0.181054	0.175678	0.119836	0.143011	-0.190225	-0.076026	-0.0398101	-0.181933	-0.0183065	0.049734	-0.071163	0.0702028	0.145458	-0.107319	-0.104128	-0.0333282	0.065651	-0.166355	0.0120723	-0.166189	-0.0300488
27	0.701	-0.265839	-0.232547	0.37186	-0.00566065	0.503451	0.138561	-0.054507	0.0374073	0.0680838	-0.117081	-0.0423335	0.0678622	0.015798	0.0178662	-0.0746629	-0.0740393	0.134128	-0.0011618	-0.0420165	-0.0839484	0.0927536	-0.0744984	0.0426031	0.00348362	-0.0297669	0.00886114	0.0558783	-0.00490282	0.0322976	0.00874992	-0.00415433	-0.0357916	-0.00892401	-0.0248013	0.0214318	-0.0298654	-0.00213936	-0.00445489	-0.0037442	-0.00354534	0.0213062	-0.0224839	-0.0254871	0.000744581	0.00191356	-0.0209801	0.00463781	0.0488526
28	0.678916	-0.100528	0.209023	-0.284277	0.186891	0.221525	-0.109846	0.0297694	-0.137518	0.275697	-0.141059	-0.105613	-0.143124	0.0678663	-0.0711611	0.049677	0.204106	-0.0962718	-0.0152492	0.0803052	0.166906	0.043034	0.0404672	-0.133105	-0.115547	-0.0267948	0.0183214	0.100454	0.0266873	0.0818007	0.110259	0.0716667	-0.0999559	0.145323	0.0309998	0.286647	0.122111	0.0630892	-0.0472644	-0.0256935	0.0287649	0.0491981	-0.106467	0.0592934	-0.135099	0.0788166	-0.0879816	0.0278258	0.115147
29	0.316759	-0.0126525	0.505332	-0.298378	0.183571	0.0877134	-0.209288	0.1572	-0.0722913	0.152831	0.0434216	-0.265732	0.129572	0.0410399	-8.07435e-05	0.120075	0.101687	-0.000315724	-0.0879275	0.283714	0.194513	0.0902123	0.183983	0.173781	-0.103385	0.00639851	0.0293759	-0.106806	-0.0669891	-0.115074	0.203284	-0.0675119	0.0340195	0.0493225	0.0834964	0.0604808	0.0334677	0.0306066	0.0538343	0.031145	-0.0696282	0.00398952	-0.17699	-0.176168	0.0279067	-0.164599	0.100858	0.183856	0.0273186
30	0.620971	-0.0221367	0.18694	-0.480051	0.221701	-0.0374989	-0.131459	0.14252	0.00929983	0.0879761	0.0703449	0.115165	-0.0794393	-0.162315	-0.0565617	0.312414	-0.103274	0.00480145	-0.141607	0.0386925	-0.0946046	-0.108867	0.0209731	-0.183822	0.140747	-0.147178	-0.048316	0.0828659	0.0110673	0.0340089	0.11796	0.0180028	-0.0252052	0.137695	-0.179508	-0.0163882	0.114544	0.0585035	0.00491558	0.0516011	0.115258	0.0148541	0.0477057	0.0562819	0.0273079	0.0863798	-0.0651496	0.0365286	-0.0701096
31	0.28479	-0.0863781	0.0270096	-0.347248	0.383761	0.559103	0.063929	-0.136825	-0.106607	0.18597	0.24232	-0.046998	0.0427259	-0.0116638	0.0266558	0.175107	-0.0403353	0.24302	0.141353	-0.0227927	0.117774	0.011109	0.0235905	-0.0480844	0.124458	-0.0383803	-0.113887	-0.026735	-0.0468805	-0.0474529	0.00806954	0.217832	0.155032	-0.162977	-0.0879018	-0.183922	-0.122697	0.174745	0.00953761	-0.0118498	0.132939	-0.0565141	0.11138	0.0498404	-0.225933	-0.00188668	0.161003	-0.0561186	-0.109226
32	0.747117	0.0624409	0.290033	-0.458174	-0.0157127	-0.0847244	-0.192751	0.104277	-0.150392	-0.048241	-0.270836	0.133668	-0.139897	-0.179201	0.0229152	-0.0415154	0.116807	0.0207219	-0.13012	-0.104872	-0.033461	-0.030933	-0.144664	-0.113044	-0.00884991	-0.0389451	0.0500178	0.0627893	-0.0186129	0.0638299	-0.000910098	0.047243	-0.0717136	0.058732	0.0938338	0.050228	0.0156203	0.120534	-0.0723624	0.00509609	0.0964079	0.00127971	0.017902	-0.0129753	0.180293	0.0236525	0.163031	0.0862907	-0.00631144
33	0.64556	-0.203255	-0.107138	-0.205892	-0.34873	-0.0641955	0.117176	0.137862	-0.0423656	-0.227673	-0.200393	0.168278	0.0975776	0.181464	-0.0285305	0.0337315	-0.0610318	-0.170424	-0.0270912	-0.122188	-0.270649	-0.00580362	0.136896	0.23053	-0.0886074	0.031989	-0.0397048	0.0163511	0.0441772	-0.00100522	-0.0939201	0.113441	-0.0806751	0.103136	0.0629254	-0.084979	-0.0917816	0.0763226	0.0510097	-0.101967	0.0577094	-0.0528637	0.0923216	-0.0666187	0.0150992	0.0229395	-0.0479741	0.0933201	-0.0870672
34	0.50996	-0.0945924	0.292476	-0.350878	-0.378427	-0.0859006	-0.00684442	0.0992051	0.0780828	-0.197706	-0.143828	0.129418	-0.13683	-0.0291148	0.105325	0.0181343	0.204902	-0.0353602	0.0217312	0.01749	-0.270054	0.00795649	0.00778552	-0.0480852	0.110301	-0.122095	0.12383	0.0684591	0.133744	0.0880124	-0.259736	-0.130534	0.0483713	0.0700215	0.106262	-0.0796341	-0.0585208	-0.00797431	0.00358475	0.155234	-0.076806	0.0570518	-0.00596869	-0.00862671	0.13449	0.0478503	0.095214	-0.044989	-0.026054
35	0.430932	0.197978	-0.24966	0.0397562	0.220869	-0.360201	-0.0899406	0.198415	0.147518	0.0428686	0.0925722	0.232241	0.14469	0.165766	0.0237778	0.0342479	-0.101728	0.24386	0.12117	0.0874922	0.046293	0.209663	-0.0155072	-0.127639	0.0213067	-0.022533	-0.131413	0.208726	0.0919182	0.0196185	-0.182884	-0.0621323	0.0410644	-0.181246	0.0584843	0.243006	0.0536047	-0.205138	0.0966312	0.037959	-0.0375797	0.0140174	-0.010961	0.0753207	0.0473573	-0.0302115	-0.0991448	0.0186717	-0.1015
36	0.563366	-0.0826589	0.132684	-0.34537	0.0740522	-0.187272	0.123756	0.152436	-0.0924429	-0.051179	0.114796	-0.0988454	0.0886631	0.156021	-0.0364332	-0.266707	-0.0120898	-0.147831	-0.0793388	0.100921	0.0250238	0.191821	-0.33617	0.143422	0.0898411	-0.179138	0.0910297	-0.189436	0.00421341	0.0288769	0.0293389	-0.109076	0.00204264	-0.121272	0.119427	0.14112	-0.151394	-0.203365	-0.0023812	0.0173421	-0.135553	-0.0661865	-0.0771286	0.165491	-0.162127	0.12278	0.115723	-0.0786811	0.209702
37	0.402219	-0.0185238	0.0420674	-0.373647	0.0798081	-0.0559985	-0.171625	-0.0116551	0.172171	0.135387	0.0461591	-0.0807742	0.114106	0.0165086	-0.0076794	-0.144875	-0.038068	0.226113	0.167639	-0.221592	-0.240318	0.0398866	-0.280263	0.036452	0.222157	-0.149486	-0.0440241	-0.191971	0.253718	0.0190939	0.15019	-0.0529005	0.0127896	0.0987677	-0.139829	-0.220486	0.256196	-0.117545	0.109247	-0.0635814	-0.212474	0.14461	-0.149231	0.0558897	-0.0602541	0.0400181	0.0902249	0.0726567	-0.0435457
38	0.498224	-0.0877424	0.276102	-0.40689	0.13966	0.149275	0.0671541	0.0997976	0.00900195	0.249473	0.360923	0.16979	0.0201443	-0.148916	-0.465236	0.0205429	0.0484012	0.0227821	-0.0810312	0.168355	0.0242368	-0.28103	0.162989	-0.186175	0.0800066	-0.0463995	0.164469	0.283214	0.103481	0.154904	-0.0111531	0.0421581	0.0866677	0.117578	-0.00209788	-0.0592301	0.0396973	-0.0360051	-0.0398313	-0.0615618	0.0342063	-0.0203974	-0.0418666	-0.0777245	-0.0324368	0.0179829	-0.00317163	-0.0139975	-0.0909802
39	0.593099	-0.153997	-0.0349836	-0.19895	-0.106124	-0.00888783	0.121816	0.198763	-0.107979	-0.195162	-0.164477	0.0770605	0.00948542	0.0926354	0.00156433	-0.0958236	0.0751173	-0.132327	-0.28683	-0.00528655	0.0444862	0.0929035	-0.147206	0.210626	-0.164902	0.0057648	-0.0557484	0.192899	-0.0527153	-0.125131	-0.0366832	0.0610165	0.119623	-0.00335787	-0.0968359	0.0168756	0.0390185	0.0721984	0.0192671	0.119606	-0.0391344	-0.0178822	-0.0250228	-0.177755	0.0554536	-0.057852	-0.0155296	-0.0002299	0.00901819
40	0.378796	-0.0160097	0.183514	-0.403038	0.205451	0.225896	0.188383	0.143968	0.0368301	0.076795	0.0150727	-0.0986489	-0.0456153	-0.386524	0.15116	-0.104651	0.196828	-0.0852247	-0.21995	0.254298	0.0897246	0.128607	-0.079219	0.300737	-0.122936	0.141157	0.0215233	0.185801	0.133363	-0.0349583	-0.351954	-0.110147	-0.0801209	-0.190311	-0.246449	-0.0703913	-0.107114	-0.143705	-0.104252	-0.0644162	-0.0743401	0.0254115	0.032481	0.0288809	-0.0889394	0.0396618	-0.160271	-0.00311197	-0.0793665
41	0.364171	0.0859851	-0.0804251	0.26947	0.131215	0.0638804	-0.170458	0.0694279	0.115176	0.276309	0.0225204	0.0850727	-0.0686205	0.106617	0.107051	-0.12534	0.311528	-0.296586	-0.0412247	0.125072	0.0814853	-0.0188867	0.0687435	-0.0751881	0.175377	0.0486606	0.0300912	-0.0885667	-0.313347	0.0297742	-0.188618	-0.0305246	-0.026036	0.170628	0.000532391	-0.035878	0.105399	-0.0535969	0.147334	-0.101813	0.141033	0.0306475	0.0136612	0.136416	0.0869512	0.00242543	-0.00683938	-0.0490112	-0.0522406
42	0.571299	-0.0422164	0.257567	-0.149005	0.0740566	-0.122374	-0.118216	0.0487463	0.00898043	-0.136251	-0.0584848	-0.0504029	0.194546	0.158926	-0.148024	0.0624711	-0.330796	0.224303	0.0921991	-0.17064	-0.0282446	0.0834486	-0.124806	-0.035969	-0.0440133	-0.012461	0.0012794	-0.0702933	-0.0280676	-0.173904	-0.0184711	0.00456949	0.218611	-0.067174	0.0391814	-0.174519	0.0168231	0.147919	-0.0132384	-0.0780731	0.0582024	-0.00183582	0.0130537	-0.0832412	0.199073	-0.0514725	-0.0619323	-0.152953	-0.0133312
43	0.0202101	0.0491335	0.0350423	-0.129938	0.149106	-0.269782	0.0291123	-0.438145	0.241636	0.111345	-0.0564598	0.107227	-0.0261961	0.358915	0.0980041	-0.0519542	-0.0386327	0.0454925	-0.0926307	0.0490527	0.132605	-0.00330784	-0.0836218	0.0947265	0.230644	0.0360647	0.104846	-0.165403	0.100641	0.25315	-0.00968557	-0.00144981	-0.092123	-0.139542	-0.00733629	-0.0155021	0.0555162	0.21048	-0.216658	-0.0590134	0.0598327	-0.209443	0.0244913	0.00408878	0.0478469	0.0596073	-0.0217588	-0.112452	0.167184
44	-0.0630486	0.0737226	-0.012845	-0.10346	0.03993	-0.13502	0.155903	-0.550243	0.147757	0.0714936	0.125677	0.307586	-0.273799	0.143792	-0.298455	0.218599	-0.159636	0.105086	-0.201995	0.0144575	0.0905045	0.0313342	0.0617333	0.206661	-0.036881	0.171321	0.257268	-0.171983	-0.117121	0.0911487	-0.101312	0.0850676	-0.0298627	-0.126672	-0.100629	0.00895449	0.0297951	-0.121253	0.0605665	0.00859716	-0.0491399	0.18507	0.138438	-0.0117426	0.0226686	0.0508672	0.137401	0.202509	0.0579729
45	-0.014619	-0.0858928	-0.00736877	0.0312352	0.216281	-0.275483	0.32231	-0.301583	0.256078	0.106154	-0.159399	-0.0972847	-0.223554	-0.0903306	-0.291595	0.213938	-0.00701836	0.0240366	-0.133302	-0.219344	-0.157412	0.102494	0.177434	0.108877	-0.118981	0.0843948	-0.127111	-0.116753	-0.206649	0.112391	-0.0433806	-0.0893683	0.00911408	0.0262808	-0.0308477	0.113508	0.0302624	0.0289225	-0.165294	0.166011	-0.00853271	0.0533354	-0.115557	0.0474766	0.0350979	0.0440628	0.123362	-0.145099	-0.110237
46	-0.0257031	0.232921	-0.0426752	-0.0461954	0.175344	-0.197655	0.259601	-0.176299	0.493463	0.196651	-0.0723683	-0.161131	-0.34845	0.488636	0.183363	-0.101454	-0.0293394	0.0806705	0.0182183	0.144858	0.100377	0.0114331	0.151693	0.0589513	0.0446413	0.024842	-0.0205487	0.0924583	0.167396	-0.142187	0.0515307	-0.0923199	0.0635289	0.140272	0.0457944	-0.0299801	-0.10018	0.208598	0.0533994	0.134477	0.0897755	-0.0815359	-0.0414078	-0.104112	-0.061513	0.054176	-0.124473	0.16215	0.00682722
47	-0.0795471	-0.114493	0.0122942	-0.185987	0.155272	0.0635095	-0.10198	-0.48291	-0.152793	-0.157618	-0.00165744	-0.192375	0.013485	0.196278	-0.123094	0.0129495	0.127886	-0.333794	-0.00964292	-0.344722	0.0592413	0.34472	0.105985	-0.137482	-0.0269439	0.165873	0.0374636	0.00232824	0.17468	0.0369723	0.0317177	-0.0680029	-0.071794	0.186147	-0.0152006	-0.162637	0.0905523	-0.167848	-0.0227014	0.089706	-0.148825	-0.129343	-0.00543827	-0.0570285	0.00364055	-0.110736	-0.0655177	0.017822	-0.084428
48	-0.182618	0.0260925	-0.273379	-0.272733	0.161988	0.155494	0.032475	-0.518033	-0.0656682	-0.198968	0.168364	-0.352726	0.118521	-0.00546379	-0.0832441	-0.0541344	0.085854	-0.264877	-0.0591879	-0.115351	0.283992	0.13581	0.0458257	-0.327845	0.0837506	0.0376784	-0.0999865	-0.0130512	0.117868	-0.00818774	-0.13753	0.0800361	-0.0576107	0.134875	0.0261493	-0.208658	-0.0635647	-0.148008	0.117613	0.0156448	0.0846607	0.034874	-0.0752717	0.0918509	0.0663091	-0.0752592	-0.082973	0.0126903	0.0927331
49	-0.474508	-0.293961	0.153506	0.11854	0.0942091	0.200522	-0.0895098	0.0537542	0.109617	0.022361	-0.197266	0.34873	-0.105989	0.0482703	0.050191	-0.0675276	-0.143986	-0.138695	0.0115957	0.18528	0.243768	0.13766	0.0017072	-0.0443935	-0.0633248	-0.00722243	0.0304981	-0.159134	0.100176	-0.0527555	0.101886	-0.0459363	0.0430073	-0.0153062	0.0414924	-0.0766922	0.152155	-0.0273543	-0.0715806	0.0924629	-0.0215524	-0.0739914	0.117215	0.070218	0.0148119	0.0457321	0.056242	-0.132563	-0.140152
50	-0.506183	-0.2783	0.129576	0.0543675	0.297153	0.00988091	-0.0358255	0.0769785	-0.0337964	-0.0232414	0.00890308	0.190245	-0.0680548	-0.0772507	0.131619	0.302503	-0.0960149	-0.104667	0.0132473	-0.0210077	-0.00823216	0.0828771	-0.180039	0.0431151	0.0524965	0.103359	-0.0184916	0.0738145	0.0389512	0.00108697	-0.00903474	-0.120982	0.0361918	0.0493158	-0.0373236	0.0514454	-0.0652109	0.0472385	0.123317	-0.0672413	0.00521492	0.00792139	-0.003468	0.00324625	0.0584963	0.0167107	-0.0701507	-0.0452268	0.0647226
51	-0.151283	-0.348846	-0.207587	-0.232703	-0.190214	0.0392058	0.142272	-0.174159	-0.264015	-0.0287648	-0.11093	0.184677	-0.180245	0.157593	-0.13467	0.116439	0.397326	0.162961	0.360367	-0.00224654	0.0324945	0.00774431	-0.220099	-0.142121	-0.142598	0.0525069	0.108655	0.0391427	-0.0514879	-0.106562	0.0768747	-0.0892714	-0.0755252	-0.0845587	-0.0901612	-0.0469023	0.0365577	-0.000756829	-0.0390809	-0.0746145	0.00543312	-0.0755299	-0.0397102	-0.0618461	0.0717442	0.0472796	-0.0858758	-0.0494359	-0.00972004
52	-0.237692	-0.272394	-0.185029	-0.291218	0.118071	-0.150482	0.243876	0.170737	-0.268338	0.170503	0.154144	-0.14544	-0.384976	0.159382	0.309853	-0.029249	0.00283107	0.145164	0.125216	-0.0634674	-0.0466441	-0.0777785	-0.20624	0.00278002	-0.0159952	0.0191341	0.028828	-0.16091	-0.175707	-0.0886941	-0.139115	0.143495	0.179697	0.144159	0.0390319	-0.15641	-0.0924922	-0.0487275	0.0430029	0.138008	-0.021409	0.0322751	0.106874	0.0318151	-0.0854922	0.0395474	-0.0263951	-0.0196858	-0.00238186
53	-0.0461107	-0.276774	0.0316445	0.184003	0.11755	-0.244277	0.149782	-0.0499871	-0.0956886	-0.0810067	0.0736434	-0.129619	0.197084	0.0414522	0.0309574	-0.222918	-0.181005	-0.17143	-0.071215	-0.190096	0.132816	0.134488	0.00598848	-0.1909	-0.0696465	0.0765053	-0.157407	0.0406424	-0.00783038	0.122587	0.140893	-0.0879794	-0.116493	-0.0474926	-0.127973	0.0655177	0.106491	0.0895353	-0.119777	0.108763	-0.0164828	0.282572	-0.0486414	-0.0674411	0.00949963	0.14376	0.136332	0.0233384	-0.169865
54	-0.169926	-0.230985	0.0220116	0.108104	-0.322192	0.0214946	-0.35238	-0.192216	-0.0305032	-0.0704364	-0.000366108	-0.161479	-0.0574442	0.0327352	0.177347	0.0825754	-0.159193	-0.21542	0.0610139	0.145456	0.0622312	0.145235	0.0560596	0.048991	0.0487118	-0.093391	0.0585845	0.0704573	0.0728336	-0.00645551	-0.036863	0.0196504	-0.0349867	-0.0155077	0.0104343	-0.0399255	-0.0744362	0.0748809	0.0801631	-0.0955267	0.00808585	0.0252499	-0.043241	0.0331479	-0.0633953	0.0683761	0.0439465	-0.00877209	-0.140831
55	-0.233865	-0.209014	-0.02479	0.00478309	-0.125543	-0.0448224	-0.155075	-0.13243	-0.0332945	0.174882	-0.129474	-0.173442	-0.035281	0.0423719	0.0641988	-0.168914	-0.0934731	-0.0942371	0.140587	0.354446	-0.232039	-0.0198729	0.00402938	0.0888414	-0.331625	-0.0835641	-0.0062675	0.0908781	-0.0181292	0.0640219	0.166298	0.00890258	-0.00415657	-0.0454805	-0.0995451	-0.112223	0.023291	-0.0695924	0.218757	-0.0731354	0.163948	0.0985158	0.0301937	0.000758596	0.0273586	-0.010684	0.063016	-0.0181205	0.104068
56	-0.341026	-0.275299	0.182394	0.0891176	-0.010014	-0.165758	-0.0412609	0.0877649	0.12508	-0.0816718	-0.282659	0.069291	-0.0466831	-0.0995453	-0.0700347	0.486682	-0.195778	-0.0394362	-0.0385175	0.181942	-0.102834	0.129252	0.00930952	-0.0509298	0.0798136	0.0196744	-0.0301334	-0.036023	0.00842454	0.0100332	-0.070969	0.156674	0.0633003	0.0475319	0.0639597	-0.0437654	0.0844156	0.0225469	0.0801111	-0.115814	-0.00907713	0.0848795	-0.134201	0.0125114	-0.0839778	0.133345	-0.120902	-0.103085	0.147239
57	-0.399851	-0.261359	0.00203791	0.109602	-0.281196	0.0297801	-0.130458	0.204652	-0.064737	0.0313612	-0.181124	-0.153986	-0.0344209	0.0249724	-0.0488616	0.213159	-0.032575	0.0875153	0.0185996	0.369262	0.0204964	0.0959422	0.0172815	0.0416477	-0.000767467	0.114116	0.0273471	0.00362646	0.112467	0.138859	0.123773	-0.0159507	0.00937153	-0.0724975	0.110238	-0.0394575	0.116313	-0.0184749	0.0585978	0.0150708	0.0671646	-0.0677283	-0.171485	0.00412526	0.0207968	0.0224757	0.0457287	0.0225519	0.0073821
58	-0.24067	-0.205451	0.0320495	0.005635	-0.279547	0.0964236	-0.320826	-0.105392	0.0144026	0.0699438	0.0275666	-0.0828145	-0.000352612	0.0962068	0.018928	0.0164828	-0.143376	-0.0138224	-0.0252509	0.0280354	0.200993	-0.0775718	-0.185343	0.244714	0.00602897	0.0869221	-0.150392	-0.122531	0.0466524	0.236665	-0.0831634	0.160134	-0.0105018	-0.126591	0.0981838	0.00728811	-0.105307	-0.0661858	0.0923251	0.179126	0.178365	0.0185369	0.0130803	0.0288542	0.121974	-0.0407413	0.0247635	0.0829788	-0.145515
59	-0.0973848	-0.053206	0.0269488	-0.232123	-0.18903	-0.197009	0.0860911	0.0828257	0.313915	0.251256	-0.0167315	-0.40418	0.00697092	0.116223	-0.231279	-0.280359	-0.00153813	-0.0534706	0.0986182	-0.059451	-0.0603555	-0.0154798	-0.078204	0.00900106	-0.0953247	-0.00713648	-0.109847	0.0489646	-0.0155231	0.070815	-0.109089	-0.0602891	-0.0167088	-0.219192	-0.15972	0.00273737	-0.0339884	-0.0365312	-0.00376149	-0.285753	0.0204697	-0.261622	-0.0171438	-0.0432768	0.117158	0.187242	-0.00907633	0.0938607	-0.112455
60	-0.465666	-0.410617	0.175139	0.125455	0.428009	-0.0710308	-0.0132639	-0.27559	-0.386026	-0.120072	-0.0557086	-0.0395359	-0.0226041	0.0727565	0.0816139	-0.00934663	0.153144	-0.0032346	-0.0337583	0.10157	-0.317481	-0.0394299	0.190739	0.047514	0.0212984	-0.202672	0.00786638	0.035961	0.0966012	-0.114611	-0.0633794	0.0774825	-0.022295	-0.131055	0.0397208	0.0745329	0.0858368	0.0586991	-0.0503532	-0.0276998	0.00899	0.000503539	-0.0818974	0.0441373	0.03425	0.0128305	-0.00779304	-0.0188375	-0.0555466
61	-0.370273	-0.430352	-0.115256	-0.0554526	-0.172845	0.0326321	0.0983455	0.081027	-0.247282	-0.0598256	0.0681268	0.0538279	-0.0446721	0.0274509	0.258584	0.23182	0.103676	0.0418112	-0.177306	-0.111906	0.0629468	0.105764	-0.0209552	-0.107557	0.201803	0.116192	-0.0891586	0.122394	-0.0290059	0.0948136	0.145261	-0.203694	0.15467	-0.0880818	-0.0623646	0.0630999	0.0968705	-0.0576978	-0.0624798	-0.0456545	0.0141398	-0.0762009	0.203009	-0.0551212	-0.0225006	-0.0451516	0.0172893	0.0423181	0.089607
62	-0.150028	-0.211827	-0.361467	-0.140651	-0.306391	-0.0693879	-0.131263	-0.292353	-0.181651	0.00887538	-0.0767544	-0.109351	0.040964	-0.198679	0.0878672	0.109433	-0.14241	0.0791623	0.00188225	0.097186	-0.00173312	0.174193	0.160251	0.0420592	-0.156422	-0.0259645	0.0140946	0.135411	-0.135009	-0.00804812	0.0288294	0.00647428	0.155446	0.133897	-0.00639243	0.0191554	-0.0625447	0.095558	0.0173236	-0.14893	-0.255806	-0.0408779	0.0660767	0.159771	0.0415941	-0.0831927	-0.00188564	0.0193959	-0.0883541
63	-0.17984	-0.405559	-0.194642	-0.165688	-0.284944	0.0365648	0.224326	-0.232656	-0.217934	-0.0584515	-0.0182445	0.112617	-0.21216	0.140811	-0.143583	0.213646	0.337538	0.17983	0.303506	0.079746	0.0399654	0.0560092	-0.150986	-0.0817086	-0.0554346	0.0622882	0.0715815	0.00671162	-0.133738	-0.121609	0.0483208	-0.164986	-0.052528	-0.0482629	-0.0562848	-0.0093504	0.0922667	0.0310862	-0.0348513	0.0211327	0.0495146	-0.0374487	-0.0341412	-0.0168857	0.0254886	0.0161812	7.22017e-05	-0.0792614	-0.0366949
64	-0.193144	-0.194905	-0.240972	-0.0967609	-0.121536	0.0792141	-0.0482079	0.0195167	0.183274	0.183922	0.0449272	-0.0342979	0.0096186	-0.259145	0.0276391	-0.211428	-0.128819	-0.06636	-0.119539	0.153534	-0.201495	-0.0832337	-0.0633746	-0.0378834	0.0956541	0.00232456	-0.0716851	0.0989454	-0.0170153	0.0194725	0.242877	-0.0397432	0.00900714	0.020721	-0.0775091	-0.0251178	-0.0023125	0.112393	-0.0834292	0.184653	-0.137113	0.0217644	0.128031	0.0241739	0.0810075	0.015999	-0.172741	-0.0258824	0.0360319
65	-0.460442	-0.233895	0.166326	0.15458	0.150653	-0.0777392	0.0177921	0.117444	0.0768842	0.0313741	-0.138665	0.0569602	-0.10955	-0.0434602	0.075724	0.172209	-0.16779	-0.0899956	0.157595	-0.0564415	0.13349	0.0318826	-0.110264	-0.0797242	-0.159815	-0.0978143	0.0819109	0.0894829	-0.0542137	0.0529286	-0.00549676	-0.172713	-0.0118724	0.0632668	-0.0160769	0.0141338	-0.124869	-0.0121004	0.0781766	-0.185536	0.0368426	0.00624035	-0.0725621	-0.0157992	0.0345065	0.021027	0.0769133	0.0768172	-0.14089
66	-0.426285	-0.273702	-0.131776	-0.172957	0.172995	-0.0330134	0.0537706	0.088788	-0.0428722	0.187085	0.171432	-0.132244	-0.040311	-0.0735006	0.23288	-0.191187	0.0441812	0.143992	-0.023784	-0.0383849	-0.110912	0.134965	-0.0958956	-0.0793239	-0.233189	-0.0449226	0.210669	-0.0187583	-0.0581024	-0.015424	0.16497	-0.114809	-0.0904497	-0.0213251	0.247857	-0.0378384	-0.130935	0.0191293	-0.10206	-0.0251803	0.0885455	0.0782835	-0.0201554	-0.0549972	-0.0783482	-0.0183015	-0.0762583	-0.0776807	-0.189491
67	-0.379767	-0.261488	-0.122914	0.00659291	-0.137718	-0.0750544	-0.0102787	0.0893356	0.0474698	0.149753	-0.140854	0.0201325	-0.0889317	-0.00317373	-0.000630976	-0.0675272	0.0236385	0.19594	-0.0991672	0.130973	-0.0309138	0.0495879	0.173495	-0.0928544	-0.0250799	-0.0752964	0.0718938	-0.0350972	0.181898	-0.0391291	0.0178365	0.224839	-0.087641	-0.0736769	0.0427327	-0.0313771	0.0103139	-0.129487	0.020586	0.0165128	0.0862559	-0.0419684	-0.123096	-0.0466135	0.000815624	0.0653887	-0.0475635	-0.0334302	0.0291312
68	-0.370029	-0.212295	-0.0249813	-0.0347194	-0.122245	0.0954451	-0.113929	0.158586	0.260584	0.326281	-0.0518163	0.165263	-0.0294477	-0.0901905	0.042614	-0.203888	-0.227486	-0.0854005	0.0673053	0.231611	0.0320962	0.0890815	0.0154198	-0.222696	-0.157825	0.00859276	0.144504	-0.0411486	-0.110716	-0.0179424	0.110041	0.0503787	-0.140741	0.0163583	-0.0196493	-0.172672	-0.0348886	-0.0155952	-0.0396802	0.232431	-0.081124	-0.0108455	0.103065	0.0220329	0.0774204	-0.0392423	0.000217799	0.0625668	0.0728678
69	-0.457079	-0.396659	-0.0406048	-0.0631213	0.0456056	-0.0501922	0.0372461	0.0616443	-0.329384	0.0838641	0.0280892	0.0919469	-0.151013	0.0587613	0.314831	0.0774743	-0.0889534	0.0951076	-0.031192	-0.116354	0.204124	-0.0198882	-0.0719661	-0.0181809	0.0439685	-0.0109323	-0.0261981	0.0451434	-0.158431	0.188217	-0.0268087	0.0740956	0.0877581	0.0344071	-0.0337083	0.0374528	-0.0116909	-0.0784449	-0.00118456	0.0233777	-0.0881355	0.03086	0.00101636	0.00571391	0.00937107	-0.0287209	-0.0397183	0.0652072	0.0732101
70	-0.504918	-0.440182	0.125444	0.183321	0.438148	0.0849895	0.0136803	-0.0761353	-0.364857	-0.0979364	-0.0737319	0.0697023	-0.167762	0.0389199	0.131372	-0.115885	-0.0192686	0.0954811	-0.132571	0.0429038	-0.160991	-0.122058	0.0775113	0.131013	0.00920698	-0.182124	0.0163222	-0.0183486	0.1026	-0.0510797	-0.0827049	-0.00293997	0.0129031	-0.00819822	0.0432854	-0.00277026	0.0385302	0.00869514	0.0355003	0.027742	-0.00777308	-0.0681812	-0.0425948	0.0157565	0.0386734	-0.0792678	-0.0193297	0.0146868	-0.0114796
71	-0.301606	-0.380132	0.212897	0.341834	0.166238	-0.1074	0.231693	0.323637	-0.087508	-0.196787	-0.356369	0.154139	0.0680281	0.0523302	-0.082365	-0.0817879	-0.112178	-0.0263262	0.0279065	0.202288	0.190409	0.108913	0.0120668	-0.134434	0.0935371	0.026097	-0.0257078	-0.17858	0.0317298	-0.0480431	0.0023841	0.153018	0.019924	0.0251403	-0.0370126	-0.0199397	0.0432815	-0.00591612	-0.111342	-0.115088	-0.111134	0.126102	-0.0471863	0.000521986	-0.0769878	0.0988599	-0.0296971	0.0179986	-0.0652541
72	-0.00866214	-0.0361471	-0.267493	0.148261	0.205309	-0.15751	0.242181	0.207026	0.0592261	-0.0142864	-0.0302446	0.229461	0.256313	0.0243673	-0.183377	-0.28268	0.245453	0.230624	-0.117517	-0.0472754	0.165077	0.140445	0.229413	-0.0080188	0.0258236	-0.0223219	0.024565	-0.0579052	0.10502	0.104893	-0.0307218	-0.0268	0.159518	0.113937	-0.0631184	0.0483452	-0.0655991	0.0301271	0.238512	-0.111665	0.147797	0.00497463	0.0572431	0.0736578	-0.0718728	-0.0795311	-0.0259738	-0.109221	0.019095
73	-0.397312	-0.201819	0.0302879	-0.0697974	0.223107	-0.053819	0.0619507	0.179024	0.0873563	0.117403	0.0182026	0.0479616	0.03662	-0.161376	0.0861059	0.0839679	-0.197194	-0.127193	-0.0109685	-0.11279	-0.0603218	0.0117369	-0.0982571	0.0943699	0.0267057	0.137975	-0.0125855	0.120165	0.0293873	0.103998	-0.0140309	-0.0923403	0.0283675	0.153361	-0.026162	0.0688576	-0.0122962	0.109978	0.106974	-0.0387358	-0.103388	-0.0678383	0.12739	-0.0381821	0.0965864	-0.0472426	-0.063981	-0.0345188	0.102204
74	-0.345328	-0.239108	-0.0370607	-0.112859	0.0603978	-0.0693774	-0.177772	-0.0985999	-0.182505	0.14425	0.0149193	-0.00433746	0.174102	-0.0411505	0.0836383	-0.210167	-0.0274112	0.0897811	-0.0193298	-0.120043	-0.0147113	0.0500818	0.114266	0.119433	-0.0811025	-0.00895928	0.0458022	0.156404	-0.076897	0.308723	-0.0212934	-0.145459	-0.104957	-0.136735	0.0998687	-0.0404609	0.0385674	0.0176506	-0.114017	-0.115576	-0.0315543	0.153445	0.029638	-0.0562911	-0.0907143	-0.0674648	0.0149674	-0.00391711	0.0710232
75	-0.104728	-0.300626	0.0404398	0.323203	0.234999	-0.20997	0.243382	0.0223968	-0.200391	-0.298261	-0.159592	0.00609763	0.0491559	0.03668	-0.217223	-0.23479	0.107198	0.110593	-0.0482164	0.00323074	0.0347195	-0.0022658	0.0152756	-0.0337138	-0.0464611	-0.0960345	0.0205152	-0.131827	-0.0430211	-0.173571	-0.0072686	-0.0380868	-0.032434	-0.0555904	-0.222867	0.137457	0.0330417	0.126763	0.0425379	-0.04697	0.0169265	0.00904228	0.0442212	0.0971121	0.0899723	-0.0505207	-0.0422221	0.137811	-0.0240072
76	-0.318284	-0.312043	-0.105962	0.0355416	0.000333263	-0.224963	0.250381	0.174968	-0.0539119	0.179528	-0.263216	-0.280257	-0.156475	-0.00856642	-0.0804037	-0.204119	-0.0723801	0.161347	0.0719146	0.050213	0.0189113	-0.158354	0.0388962	0.0119533	0.227558	0.0517385	-0.081803	0.104969	0.0945162	0.210066	-0.0823985	-0.00680467	0.00332208	0.196873	0.0812458	-0.0842304	0.0255278	-0.0667314	-0.0161623	-0.116856	0.0239158	-0.103941	0.0790481	-0.238295	-0.0956304	-0.14729	0.180696	-0.0604383	-0.00151291
77	-0.212662	-0.39012	-0.00473667	-0.129145	-0.177138	-0.0432124	0.282252	0.230736	0.0588833	0.0658906	0.286783	0.10701	0.110843	-0.00651078	0.209091	-0.152035	0.0392579	0.121229	0.021183	-0.27058	0.242377	-0.162246	-0.0424624	-0.039295	-0.146467	-0.0228919	0.100074	-0.0917159	-0.032517	-0.0971016	-0.0989049	0.278897	-0.0692637	0.021564	-0.0447075	0.0109208	0.0326195	-0.0470453	-0.024606	-0.0234895	0.0101744	0.011875	-0.196731	-0.114233	0.108794	0.00397955	-0.0439646	0.0454111	0.0948995
78	-0.010708	-0.204512	-0.0530818	0.0356775	-0.194224	-0.0257547	0.186278	-0.119578	0.117265	-0.115186	-0.332346	0.0116453	-0.0327566	-0.35153	-0.0613661	-0.165353	0.311308	0.299303	-0.230243	0.185304	0.0444052	0.0902641	-0.100336	-0.151969	0.241681	0.0872417	-0.0787089	-0.221402	0.0787893	-0.0065129	-0.00599714	-0.0237554	0.0604097	0.0030642	0.147836	0.0202889	-0.0750237	0.0296876	-0.000138619	-0.0171096	0.0813901	0.100837	0.127858	-0.0505127	0.0306002	-0.109032	0.0494866	0.131232	-0.0440851
79	-0.00332648	-0.402882	-0.0711562	-0.109842	-0.505725	-0.0167247	0.206261	0.172513	0.105199	-0.0249295	0.401732	-0.000818542	0.191322	-0.0425467	0.282735	0.0202499	0.0417015	-0.0989551	-0.0680621	-0.188917	0.01278	0.0261824	0.137473	-0.0288801	-0.0209265	-0.0179174	0.0488371	-0.040457	-0.0176067	0.0318247	0.0131387	0.184626	0.0555853	0.0158768	-0.047235	0.133805	0.109414	0.107643	-0.00783479	-0.0681767	0.0393107	0.0196189	-0.0427453	0.0111713	0.0681668	-0.0305962	0.00629663	0.016703	0.0669036
80	-0.279629	-0.286377	0.157637	-0.132098	-0.0260007	-0.139544	-0.070353	-0.136757	0.133443	0.0982463	0.0515655	0.145127	0.23126	-0.0935118	-0.273487	-0.131048	0.0286649	0.202297	0.0497264	-0.128202	-0.0487099	-0.0496929	0.0690647	0.100398	-0.160917	0.0890018	0.069409	0.126265	-0.2308	-0.164968	-0.109815	-0.0993308	-0.09484	0.138605	0.209252	-0.0177463	0.0176561	0.02243	-0.0386426	0.0960108	0.0152677	0.0861324	0.0489823	-0.00664567	-0.173238	0.0250628	-0.0865981	-0.081413	0.0812318
81	-0.196769	-0.0928455	0.208167	0.0866164	0.0757254	0.0458266	-0.165153	-0.211922	0.102664	-0.119476	-0.0258594	-0.306957	-0.0881614	0.143649	0.0090969	-0.242727	-0.0600357	-0.256321	-0.120878	-0.0803254	-0.0283794	-0.159456	0.00397951	-0.131348	-0.236021	-0.129273	-0.16952	0.0665444	0.0925975	-0.112063	-0.0312592	-0.0428953	0.151281	-0.0117359	0.00329109	0.0217207	0.113011	-0.0935931	0.0330403	-0.020211	0.209158	0.141895	0.167383	-0.060293	-0.00781315	0.0695501	0.0452728	-0.141755	0.140583
82	-0.311811	-0.246685	0.0468917	0.0158866	-0.181835	0.129479	-0.246771	-0.0647428	0.0129144	-0.01671	0.0271342	0.176431	0.0240107	0.0639321	-0.160162	-0.0744684	0.0858846	-0.0235537	0.309456	0.0713317	-0.167477	-0.0838508	0.153124	-0.0999489	0.0936183	-0.0693831	0.0281458	0.0061803	0.113251	-0.108148	-0.0589104	0.086547	-0.130421	-0.0702199	-0.163573	0.084527	-0.0645779	-0.0701091	-0.0425759	0.135379	-0.143311	-0.150681	0.142758	-0.0267386	0.0178948	-0.0743528	0.149652	-0.0314535	0.10859
83	-0.424322	-0.368773	0.288302	0.0722766	-0.0377467	0.200338	-0.0136776	0.172287	0.254963	0.0213647	-0.056715	0.267602	0.0321282	-0.0523429	-0.0716826	-0.224224	-0.149851	-0.0657009	-0.0078467	-0.0271441	0.206285	-0.141588	0.0193174	-0.023481	-0.0219809	-0.0885878	0.0555577	-0.0829931	0.0325064	-0.0702892	-0.0951647	0.0520978	-0.054093	0.121823	0.0151042	-0.0742071	0.086391	-0.0169766	-0.100992	0.024475	-0.138384	-0.0853171	0.0370115	0.055958	-0.0876341	0.0807148	-0.0531399	0.0113495	-0.0978373
84	-0.11998	-0.274142	-0.0855968	0.0365171	-0.186363	0.0891961	-0.00114879	-0.196324	0.134236	0.0545134	0.0626926	-0.382983	-0.0751679	-0.03541	-0.00625004	0.0728058	0.0704969	-0.118702	-0.0492324	0.101992	-0.102412	0.0938717	-0.163389	-0.10126	0.134637	0.0623684	-0.0968427	0.0982494	0.106046	-0.146803	0.0242931	0.0387836	0.0780898	-0.0055862	0.0185487	0.12353	-0.124071	0.00516315	-0.103931	-0.00303905	0.0672594	0.0348468	0.0702959	0.0335809	0.0753655	0.0403085	-0.00340612	-0.0433165	-0.0166841
85	-0.374788	-0.348766	0.0844529	-0.0530018	-0.538989	0.137776	-0.188703	-0.0542406	0.192119	-0.0343325	0.214248	0.0829498	0.189121	0.0230985	-0.0681888	0.0881793	0.0902348	0.0415042	0.146032	-0.0539529	0.106765	-0.0742209	0.0867627	0.0142071	0.133833	-0.0253253	-0.0322482	0.117946	-0.00500298	-0.0911628	0.0160479	0.00397735	-0.0663084	-0.0417068	-0.053606	0.142076	-0.130046	0.0129494	0.0194829	0.0302203	-0.00239373	0.040382	-0.170714	0.0453835	-0.00673889	-0.0778828	0.0429104	-0.0439818	-0.070526
86	-0.286994	-0.414842	0.131321	0.0171394	-0.0468666	0.0209875	-0.0719559	-0.246316	0.119582	-0.0447526	-0.00425747	0.166108	0.0726037	-0.11277	-0.0938563	0.0949732	-0.127443	-0.135071	0.142578	-0.0698334	0.110983	-0.11382	-0.255653	0.0267573	0.184447	-0.0992647	-0.12265	0.119182	-0.0745559	0.0845459	-0.0878373	0.0391355	-0.174324	0.0477244	0.0579303	0.13232	-0.152256	0.080353	-0.0425842	-0.0715645	0.0464123	0.061855	-0.0988904	0.0182797	-0.080176	-0.0680275	0.00544054	0.0112286	-0.0011281
87	0.03637	-0.218538	-0.0187803	-0.0260737	-0.479669	-0.125908	0.0848589	0.0454846	0.020628	0.0249818	0.163368	-0.238004	0.0877891	0.12994	-0.0929851	-0.129194	-0.0422073	0.020781	0.284449	0.054787	-0.0317467	-0.160431	0.0970761	0.305707	0.131389	0.118137	-0.104382	-0.0994494	-0.00384267	0.132329	-0.0114643	-0.0797957	-0.0163419	0.0395644	-0.179618	0.0254495	0.283919	0.177996	0.0611652	0.0753553	0.0539741	0.112378	0.0605572	0.195225	-0.091981	-0.0404295	-0.177964	-0.0154008	-0.0423118
88	-0.459953	-0.25754	0.035415	0.0558814	0.248916	0.021601	0.186662	0.192349	0.105673	0.0625511	0.0183614	0.116501	-0.160593	-0.107328	-0.0125932	0.0415853	-0.0883504	-0.0575082	-0.0674124	-0.152879	-0.00303951	-0.0364421	-0.0932234	0.0554489	0.0341577	0.10387	-0.048996	0.0392638	0.0466917	-0.0117498	-0.0375824	-0.171463	-0.0252296	0.0770953	-0.0453961	0.0935955	-0.0552302	0.0384	0.0948833	0.0378481	-0.00505452	-0.0551798	-0.0393911	-0.00780816	-0.0033243	-0.0075731	0.077243	-0.00873293	0.0248306
89	-0.383929	-0.203862	0.18292	0.128881	0.114909	-0.113696	-0.146242	-0.0589805	-0.0660228	-0.0457519	-0.149549	-0.226442	0.0148922	-0.00847916	-0.274743	-0.0226459	0.0434484	0.0703544	0.0883073	0.0279405	0.0693819	-0.227195	-0.213234	0.127461	0.0447704	-0.0684342	-0.112678	0.0374072	-0.0902594	-0.00954941	-0.0576759	0.159763	-0.0311934	0.164321	-0.0718269	0.0838363	-0.127337	-0.0694852	0.123477	0.0877201	-0.0939919	0.0386622	-0.0201227	-0.0651628	0.0862928	-0.0347084	0.0318668	0.0181407	0.0190856
90	-0.15927	-0.288979	-0.0165024	0.0028407	-0.434826	0.0098572	0.206829	0.122026	0.382073	0.0473355	-0.0700246	-0.175699	-0.10836	-0.0937193	-0.102249	0.125199	-0.0265435	-0.0256489	-0.241955	-0.0851887	-0.00306992	0.104766	0.204783	-0.117123	-0.0333473	0.0794293	-0.0594866	-0.0197259	0.0696413	-0.247106	-0.0398259	0.0739765	0.141209	-0.0840334	-0.0550454	0.126992	0.0108005	-0.0926645	0.0408114	-0.0142375	-0.0276065	0.00078535	0.0270612	-0.0569974	-0.0538873	0.02757	0.0882886	-0.143018	0.0674412
91	-0.465283	-0.407858	0.169095	0.0902859	0.368054	-0.0579035	-0.0264675	-0.217165	-0.309519	-0.0654673	0.0574971	-0.0136624	0.061161	0.0325807	0.105529	-0.101405	0.0691378	-0.0240003	-0.0385706	-0.0285827	-0.286069	-0.139398	0.202941	0.0743061	0.0570891	-0.203455	0.00379444	0.0427735	0.0765807	0.00933927	-0.127907	0.15085	-0.0380467	-0.0298082	0.0155455	0.0471057	0.0491449	0.034099	-0.0340444	0.0313459	-0.0762848	-0.0341687	0.00365809	0.0454375	0.0542949	-0.0046471	-0.027863	0.0320169	-0.013052
92	-0.237611	-0.374995	-0.124719	-0.236975	-0.431221	0.212084	-0.00955446	0.0722981	0.0918744	-0.0480042	0.351507	0.100546	0.00989676	-0.00966417	0.261076	-0.0515009	-0.0428013	0.00380539	-0.204996	-0.217143	0.0403165	0.0364118	0.0675682	0.0318247	-0.064063	-0.185415	0.108108	-0.0635926	0.0945929	-0.010784	0.00673719	-0.0484631	0.124171	0.0315417	0.0893555	0.107221	0.139267	-0.000145029	-0.0135347	-0.0494524	0.0648806	-0.133103	-0.0102985	0.095976	0.00954458	0.0514747	0.0981088	0.0614003	-0.0233063
93	-0.34855	-0.238228	0.300458	-0.151257	-0.019415	-0.0266701	-0.258857	-0.179734	0.289785	0.0504084	0.0605198	0.213222	0.365389	0.0537889	-0.228956	-0.0519874	0.107074	0.0829286	-0.0136362	-0.0706845	-0.0135859	-0.0301485	-0.0289979	0.103736	0.0362234	0.000512743	-0.0351198	0.00195319	-0.0955863	-0.0511209	0.0158193	-0.0969635	0.0835181	0.0561745	0.210892	-0.000976669	-0.078186	-0.0697771	0.0258502	0.0415536	0.0188643	-0.0257645	-0.00400714	-0.08125	-0.0231512	-0.00159017	-0.0740026	-0.0246019	-0.0445612
94	-0.277379	-0.0974575	0.295974	-0.0178511	0.0426864	-0.0285706	-0.299753	-0.211043	0.272855	-0.136606	0.037817	0.230984	0.237324	0.0444118	-0.110583	-0.0382051	0.125133	0.0194828	-0.170731	0.00451962	-0.0997738	0.0215646	-0.0792104	-0.0319028	-0.105844	-0.094449	-0.058657	0.000985037	-0.164496	-0.0882002	0.0488011	-0.0550793	0.13025	-0.0986985	0.0942604	-0.0848032	-0.0481545	-0.0467317	-0.0169997	-0.0766383	0.0852776	0.0474506	0.0771635	0.092325	-0.00576152	0.00765705	-0.0464848	0.101942	0.0820755
95	-0.261271	-0.20977	0.134216	0.137268	0.280405	-0.138327	0.119629	0.253373	0.100568	-0.0393536	0.285607	0.10748	0.262017	-0.106528	0.0147488	0.105379	0.206079	-0.147876	0.0251359	-0.0248061	-0.185559	0.0198628	-0.0651281	-0.00524116	0.0352628	0.247492	-0.0327712	-0.122915	0.184695	-0.105941	0.190275	0.00243893	-0.115082	-0.0590131	-0.0529271	-0.0694013	-0.100272	0.105535	0.0970577	0.0245968	0.00176964	-0.029936	-0.0472445	-0.00615364	0.00284163	-0.0154468	0.0316475	0.0374535	0.00615392
96	-0.451515	-0.196246	0.163351	-0.0235271	0.270959	-0.0233022	0.029105	0.168275	0.159453	0.0880774	0.21653	0.0593213	0.11903	-0.0947059	-0.0224632	0.138254	0.201432	-0.134981	-0.0328265	-0.0229661	-0.273913	0.0776659	-0.0735046	0.00940203	0.0339607	0.18186	0.0114495	-0.0327532	0.0528178	-0.0866902	0.0658686	-0.0535213	-0.108961	-0.101809	-0.0997326	-0.10685	-0.0499211	0.0650702	0.0663094	0.00660058	0.0909571	0.0465979	0.0110629	0.0323251	-0.0277526	-0.0644493	0.06828	0.124921	0.119981
97	-0.149177	0.343457	-0.265692	-0.21499	0.15429	0.0311533	-0.23415	-0.189863	-0.0268892	-0.165923	0.133702	-0.0530612	0.0796189	0.0703554	0.183068	0.154018	-0.0195975	0.095008	-0.0989998	0.0343441	-0.0791238	0.0130077	0.0496892	0.0809617	0.0251137	0.0889984	0.185765	-0.0934211	0.0319335	-0.0275138	0.00869057	0.160073	-0.203482	0.0903393	-0.0678928	0.0829644	-0.111818	0.0387627	-0.0148624	-0.118118	0.0698576	0.0968896	0.110365	-0.125621	-0.034527	0.206364	-0.00342451	-0.0419716	-0.0469421
98	-0.246588	0.460722	-0.417992	-0.348527	0.21732	0.0426367	0.0355683	0.100659	-0.0156169	0.0970226	-0.122513	-0.138563	0.225194	-0.14881	-0.04374	0.0578592	-0.0348487	-0.182348	0.220222	0.0151055	-0.0484924	0.104386	0.0793497	0.20223	0.0829081	0.156545	0.166338	-0.0480669	0.0370858	-0.147801	-0.0128368	0.13259	0.0770342	0.0458032	0.168373	0.109775	0.114643	-0.0176963	-0.112668	-0.0803572	0.0485668	0.0229001	0.0293391	0.0339867	0.0588618	0.016637	0.0452573	-0.045947	0.00511565
99	-0.249949	0.434484	0.074572	0.0043751	-0.0246126	-0.0952875	-0.139129	-0.0713758	0.0792414	0.0952623	-0.0811197	-0.177377	0.235775	0.312178	0.116354	0.15211	-0.0778098	0.0846115	-0.159593	0.060806	-0.0177985	0.0422472	0.0557704	-0.130933	0.0112337	0.0604524	0.307909	-0.00170908	0.00399868	-0.0351939	-0.170339	-0.0993274	-0.0655167	0.0540101	-0.0870863	0.00228681	-0.0605114	0.0624043	0.0526359	-0.0346412	-0.15509	-0.0401895	-0.055779	0.095742	-0.00609766	-0.118898	0.0292968	-0.0389703	0.00330412
100	-0.213428	0.400366	-0.415696	-0.154224	0.0333304	0.23223	0.0737036	0.241322	-0.0456875	-0.0866636	-0.359492	0.064955	-0.0998843	-0.000234254	-0.0164741	-0.0684616	-0.126838	-0.0733247	0.0324709	-0.195746	0.0355726	-0.232171	0.12849	-0.00643129	0.0452236	0.0222008	0.113403	0.0555507	0.0331567	-0.016924	0.0486436	-0.155446	-0.00449893	-0.134406	0.0800273	0.0178783	0.011208	-0.0970229	0.0510325	0.0537867	0.0611283	0.0572112	-0.0827118	0.096169	0.0383293	0.00928768	0.0030988	0.00987527	0.0305051
101	-0.331166	0.428936	-0.338188	-0.213089	0.174309	0.200389	-0.0360277	0.100474	0.11009	-0.183711	0.279798	0.165633	-0.125111	0.141039	0.0272034	-0.0757066	0.0268266	0.0940735	0.175518	0.2681	-0.0528128	0.0457337	0.0148542	0.0938658	0.0318966	0.0791288	-0.295999	0.0709733	0.0214334	-0.0705632	-0.0108559	0.0145684	0.0393651	0.110762	0.0661131	0.12803	0.0209336	-0.0773137	-0.224281	-0.0339038	-0.0037014	0.0317249	0.00216983	0.0680957	0.0549681	-0.00178052	0.11048	-0.00832725	-0.0197201
102	-0.211964	0.539498	-0.331946	-0.139713	-0.0773526	0.0719403	0.166103	-0.0540469	-0.0233635	0.155348	-0.286748	-0.0383635	0.134799	0.179038	0.0559493	0.00273194	-0.0423024	0.0958075	-0.237835	-0.0649734	0.0460583	-0.299643	0.0705888	0.0198123	0.123799	0.0226923	0.138451	0.161737	-0.0300854	-0.129432	0.151582	-0.0369166	-0.0112602	-0.0296692	-0.0765022	-0.086111	-0.165237	-0.0101679	-0.0174005	0.0224972	-0.0756844	0.0465049	-0.10197	0.181858	0.167307	0.0225469	0.0556966	-0.0912667	-0.01167
103	-0.210578	0.406689	-0.403873	-0.304167	0.111884	0.120348	0.0347213	0.0434199	0.0314318	-0.0628244	0.122425	-0.109641	0.100155	-0.106189	0.0577178	-0.133199	0.128698	0.0279222	0.0114611	0.189842	-0.250967	-0.0821883	0.00344017	-0.146495	-0.00972203	0.0363087	-0.0457272	-0.247886	-0.166586	0.20441	0.0895775	0.0469944	0.146258	0.0251236	-0.0823568	0.0615529	-0.0956504	-0.0749189	-0.00781703	-0.0716834	-0.0377998	0.151206	-0.0847105	-0.0761577	0.0950589	-0.0159522	-0.00467362	-0.0550862	-0.0404432
104	-0.110656	0.345271	-0.268795	-0.159673	0.0110271	0.159847	0.0282089	-0.00657186	0.120425	0.0196549	-0.302063	0.134457	0.102269	-0.0436067	-0.132513	-0.0264731	-0.0611761	-0.304779	0.20582	0.0633524	-0.13664	-0.0104396	-0.0437439	-0.249467	-0.0963576	0.00323097	-0.0191683	-0.127651	-0.155409	0.044039	-0.135991	0.105399	0.13821	-0.0054763	-0.0886838	0.0799065	0.0185949	0.0836829	-0.0973274	-0.109322	-0.0619315	-0.0336528	0.0674653	-0.0528486	-0.081445	-0.0941035	0.0139432	0.110583	0.00760934
105	-0.254968	0.373137	-0.330358	-0.292229	0.175568	0.385249	0.00635237	0.0969772	0.115996	-0.370887	0.135341	0.177611	-0.199958	0.0732504	0.070729	-0.0499002	-0.174856	-0.0812	0.0170377	0.0279329	-0.0599187	-0.0279264	0.042672	0.0368331	0.0206799	0.0310498	-0.230397	-0.0425228	0.0336617	-0.118197	-0.0508609	-0.0500184	-0.113892	-0.0152232	0.111572	0.0545655	-0.0495092	0.0226094	-0.00461986	0.0255598	0.0584548	-0.0259313	-0.0495482	0.0473257	-0.053966	-0.0570046	0.0353893	0.0728993	-0.0643513
106	-0.0806563	0.422619	-0.271861	-0.111676	0.176673	-0.171275	0.0526891	0.176862	0.304302	-0.150625	0.102263	-0.305886	-0.178701	0.0176787	-0.100791	0.0390006	0.0347226	0.161273	0.126251	-0.0257925	-0.0317032	0.176412	0.0211426	-0.148882	0.0420845	-0.166433	0.00198898	0.131615	-0.0530525	0.0825338	-0.0303372	0.053651	-0.204095	-0.0673394	0.195678	0.0720247	0.0700131	0.181724	-0.00760901	0.0554756	-0.0377972	-0.00472785	0.018108	0.0918657	0.0146177	-0.0797445	-0.0504148	0.070583	0.0980735
107	-0.22129	0.343241	-0.339126	-0.203218	0.0142065	0.354407	-0.0952703	0.0809893	-0.00793582	-0.347903	-0.274488	0.323168	-0.17531	-0.0183966	-0.0393083	-0.113277	-0.129077	-0.12763	0.0959918	-0.152473	0.0202545	-0.0909588	0.0514673	0.0295663	-0.0765715	-0.0149583	-0.0714	-0.0208453	0.0571096	0.0241518	0.0613248	-0.132984	-0.0869243	0.0195093	-0.106251	-0.0131896	-0.0766256	0.015046	0.0357294	-0.0935145	0.0641648	0.0173115	-0.0846307	-0.0538471	-0.113367	-0.00539483	0.0182585	-0.0169576	0.0859557
108	-0.230391	0.320283	-0.396137	-0.12847	0.0317796	0.0959823	-0.168512	-0.0374806	-0.138981	-0.0649731	-0.226931	-0.0438862	0.0312204	-0.115841	-0.122537	-0.0878762	0.0878497	0.088791	0.089509	-0.112729	0.32523	-0.00194061	-0.0126778	0.245612	0.129344	-0.116896	0.0855212	0.185675	0.0444681	-0.0705234	0.205778	-0.0107218	0.0466961	-0.0238261	-0.0935738	-0.0123712	-0.0158597	-0.012854	0.0774908	0.0570399	0.0384027	0.075655	0.0301611	-0.0408268	0.0280546	0.119384	-0.0322641	0.0349537	0.0936867
109	-0.274502	0.436919	-0.0422614	0.192468	0.0268924	0.0829864	-0.0438078	0.377524	0.107013	-0.204505	0.20485	-0.222768	-0.363723	-0.0269392	-0.239595	-0.0447586	-0.0239004	0.0564793	-0.135618	-0.0463534	-0.00182781	-0.0359917	-0.0250567	-0.0186878	-0.0934405	-0.0173918	0.217728	-0.0178262	0.0189406	0.0507356	0.00134886	0.0115436	0.0144265	-0.0267431	-0.0237749	-0.0491977	0.0315786	0.00924771	-0.066701	-0.0474863	-0.030703	0.0192963	0.0489075	0.0440797	0.0175793	-0.0767389	-0.039961	0.0457899	-0.0484423
110	-0.345642	0.106573	0.0556496	0.0231916	0.00941773	0.0862426	-0.362164	-0.0127606	-0.161634	-0.239354	-0.0864469	-0.130128	0.185964	0.114018	-0.101937	-0.0654223	0.0812749	0.167716	-0.312757	0.0775411	0.0817582	-0.0528462	-0.0144096	0.0567971	0.0696384	0.153148	-0.16485	0.103696	-0.152953	-0.021409	0.0579301	0.0115349	0.289936	0.0535188	-0.02987	-0.0942494	-0.0168799	0.0267849	-0.16203	0.042857	-0.0775318	-0.106795	-0.0857346	0.131362	-0.026933	0.145114	-0.0512409	0.139901	0.00297459
111	-0.162802	0.406808	-0.335013	-0.239493	-0.0726301	0.012368	-0.115517	-0.133978	-0.164201	0.0803835	-0.0474505	0.249952	0.147794	-0.100872	0.0575835	-0.0158173	-0.0845169	-0.0286433	-0.00772523	0.00537433	-0.129883	0.143499	0.135075	-0.146589	0.0487949	-0.112818	-0.077183	-0.229471	-0.152641	0.23222	-0.0715289	-0.0225744	0.135664	-0.145692	0.0180834	0.025507	-0.0247058	0.0326649	0.128846	0.0789752	-0.0334195	-0.0507184	-0.103174	-0.175383	0.0196195	0.0489319	-0.180412	-0.00247155	0.0126322
112	-0.306996	0.281724	-0.0535	-0.025039	0.00709205	0.146257	-0.198781	0.221112	-0.0399601	-0.252008	0.0828215	-0.302823	-0.0168985	0.00245282	-0.163178	0.0245325	0.0307806	0.0523563	-0.0146698	0.00825506	-0.0474683	-0.146008	-0.156032	0.0524515	-0.141702	0.159249	0.0545493	-0.110311	-0.059162	0.106542	-0.0640002	0.0110063	-0.0805546	-0.0283273	0.00779224	0.0659466	0.124503	0.032769	0.0346728	0.0718783	0.00737238	-0.0752676	-0.0367443	0.0281421	-0.0798347	-0.0558551	-0.0116085	-0.0924904	-0.021934
113	-0.279114	0.358628	-0.105651	0.124394	0.0211877	0.115206	-0.157845	0.270443	-0.0010761	-0.244755	0.245325	-0.0583832	-0.344772	-0.0385595	-0.192015	0.0394283	-0.0631414	0.0204976	-0.180907	-0.0825207	0.016556	-0.030563	-0.00754719	0.0365009	-0.0205763	0.0423656	0.234856	-0.0654668	0.0642602	0.0128632	-0.0553092	-0.0257883	-0.0180636	-0.0891078	0.0363865	-0.0584508	0.0665017	0.0911398	0.0918729	0.0290924	-0.00652708	0.0385469	0.00256778	0.0113362	0.0211272	-0.0591661	-0.0239317	-0.0493456	-0.0403943
114	-0.330313	0.664295	0.118314	0.25051	-0.179689	0.110586	-0.0231234	0.0929963	-0.215962	0.0662778	0.281668	0.215632	-0.0800009	0.168269	-0.135696	0.0206994	0.0403945	0.0728534	-0.0824032	0.0840571	-0.00419129	-0.00750777	-0.0226344	0.0412746	-0.0791192	-0.0340262	-0.104445	0.00249578	0.115913	0.0704235	-0.0151317	-0.105956	0.0574263	0.144661	-0.0542872	-0.0698149	-0.0279746	-0.0161122	-0.0614259	-0.0780019	-0.0268777	0.0775318	-0.0649799	0.00417325	0.136599	0.00432217	0.0260863	-0.152913	0.058432
115	-0.31628	0.466288	0.0112424	0.124035	-0.167024	0.130446	-0.309733	0.0531368	-0.290464	-0.0733132	0.248801	0.104025	-0.173966	0.0198753	-0.265141	0.00345892	-0.0445758	-0.0152543	0.0069667	-0.0438093	0.0344112	0.174587	0.002483	0.161278	0.0623823	-0.071513	-0.0107826	-0.0160686	0.0544252	0.0274617	0.00842014	0.040255	0.0294054	0.055113	-0.0441679	0.0247337	0.0132647	-0.0281235	-0.0521786	-0.000827245	-0.0355666	-0.0113404	0.062301	-0.244469	-0.000113214	0.121136	-0.0542685	0.00545724	0.0305267
116	-0.315699	0.486467	0.0348371	0.179212	-0.141031	0.0938058	-0.0533462	0.112223	-0.197177	0.197683	0.0389716	-0.0611838	0.134625	0.101828	-0.0565732	0.131404	0.0250421	-0.0190607	-0.23266	0.0243411	-0.100007	-0.134007	-0.20813	-0.210568	-0.0940267	-0.0572679	-0.163502	-0.122276	0.0427366	0.0572985	-0.128412	-0.171796	0.0782103	-0.0595	-0.00435028	0.057671	0.0792711	0.0558837	0.078201	0.161397	0.00236834	-0.134479	-0.0868763	-0.0958687	-0.133921	-0.0502232	-0.0191165	-0.0296897	-0.056998
117	-0.283277	0.606702	0.115216	0.330198	-0.182165	-0.0847944	0.109236	0.0401684	-0.241303	0.449366	0.107538	0.0832442	0.0527441	0.112417	-0.182527	0.202014	0.0997195	-0.151251	-0.0475036	-0.0896614	0.0237373	0.018609	-0.126721	0.0537678	0.0448755	-0.222996	0.0644012	0.0866759	0.108938	-0.123354	-0.0411481	-0.0390276	0.0846207	-0.113497	0.106748	-0.0152762	0.127002	-0.00214299	-0.0367899	-0.0157112	0.092559	0.130471	0.138303	0.00440965	-0.0255507	-0.0557821	0.0229327	0.071682	-0.0719538
118	-0.197714	0.391919	0.0586432	0.166434	-0.0186039	-0.118229	-0.143512	0.283354	0.184731	-0.171556	-0.103787	-0.285895	-0.104177	0.014269	-0.0761139	0.0381804	0.0953999	-0.00269858	0.0980254	-0.183475	0.0139121	0.207104	0.128011	-0.0270333	0.06751	-0.275112	0.0985925	0.123838	-0.166361	0.0376087	0.0618751	0.073884	0.0713398	-0.0505989	-0.0658232	-0.0568216	-0.0848344	0.0801196	-0.0707553	0.0133511	-0.0543897	-0.00558381	0.0219048	-0.0729617	-0.102028	-0.0197615	0.0958555	0.0676568	0.0653112
119	-0.257153	0.447839	0.189458	0.320909	-0.135396	-0.0893676	0.15549	0.210193	-0.0334289	0.31455	-0.0206127	-0.151172	-0.0132009	0.0851412	-0.0346886	0.261355	0.0775789	0.0294541	-0.0516584	-0.10905	-0.0942503	0.0231379	0.00093132	0.00324503	-0.206078	-0.133884	-0.193711	-0.0778775	-0.0511433	0.095933	-0.10038	0.0608594	-0.0982723	0.16975	-0.0761943	-0.122046	-0.215249	-0.0736034	-0.174183	-0.0257237	0.0191416	-0.044438	-0.0135517	0.162334	0.00182491	0.0111612	-0.0144158	0.0643191	0.0589401
120	-0.21028	0.618987	-0.14271	-0.0996792	-0.109322	0.0718056	0.385923	-0.249408	-0.115718	0.377557	-0.25933	0.0533431	0.3036	0.0687343	0.0394278	0.120214	-0.0842271	-0.235005	-0.109501	-0.0539611	-0.0251369	-0.211622	-0.107255	-0.0822897	0.0348671	-0.160469	0.0569421	-0.0224742	0.024671	-0.0935909	0.00788435	0.000745634	-0.00449943	-0.167983	0.00345769	0.0496268	-0.0098875	0.065305	0.0584011	0.0598213	-0.0167908	-0.0179725	-0.0206779	-0.0750148	-0.154726	-0.0223266	-0.0235299	0.0733504	-0.0610745
121	-0.127806	0.653517	-0.0579031	-0.131874	-0.218121	0.00336365	0.282033	0.0306033	-0.346182	0.291299	-0.338232	-0.0201597	0.352154	-0.299438	0.0412123	-0.0839884	0.0183484	-0.0521701	0.117764	0.000153703	0.0912503	0.0833971	0.00483699	0.122684	0.0306902	0.117566	-0.0323984	-0.0392332	0.114343	-0.12699	-0.131787	0.00788763	-0.0841446	0.0438884	0.148539	-0.0361699	0.097719	0.0692821	0.00593584	0.0365052	-0.0213987	0.0299673	0.058729	0.0674565	0.0714642	0.0210688	0.0537454	0.00568326	0.0160697
122	0.0451839	0.568289	0.737875	0.106092	-0.248893	0.0764148	0.13476	-0.0852586	-0.328301	-0.0302446	0.132449	-0.0196583	-0.0788911	-0.265252	-0.121912	-0.123178	-0.119558	0.0314728	-0.00225009	0.0149004	0.0551128	0.0162794	-0.092419	-0.0667906	-0.0622491	0.103794	-0.0125615	-0.0610306	-0.012524	-0.0287152	0.123751	0.0727484	-0.0683357	-0.00986633	0.0769107	-0.0434822	-0.0104254	0.0583134	-0.019815	-0.149096	0.0436086	-0.149746	0.00156522	0.177914	0.0352676	-0.0218274	-0.031882	-0.0235842	0.0657495
123	-0.122059	0.617899	0.272364	0.204437	-0.240022	-0.0513472	-0.0536604	0.0716497	-0.242599	0.0394871	0.0118297	-0.0594024	0.110829	-0.16168	0.134655	0.017788	0.124584	0.111909	0.0183203	-0.0362883	0.0416707	0.190146	-0.00294533	0.0102356	-0.0196692	-0.0322163	-0.0913261	-0.0455285	0.101858	-0.0250112	-0.122634	0.0115978	-0.169854	0.149966	-0.0708316	-0.00674465	-0.0554047	0.1579	-0.0135052	0.144036	0.0637633	0.0712748	0.0425804	-0.0821625	-0.0492126	0.162722	0.0341628	-0.061137	0.0298276
124	0.0493816	0.789579	0.216972	0.162721	-0.102317	-0.0677872	0.533346	-0.26721	0.0699722	0.027991	0.271213	0.330617	-0.0104442	0.298217	0.103077	-0.0663125	-0.109134	0.067045	-0.0528878	0.180292	-0.0328866	0.0054298	-0.0377305	0.0109911	-0.0632765	-0.0187833	-0.187982	0.187607	0.0609166	-0.00930664	0.215662	0.104094	-0.094828	0.094564	0.0515604	0.0289392	0.0465111	-0.103403	0.0300896	-0.132764	-0.118187	0.0374991	0.0427162	-0.0642021	0.0243175	-0.0913802	-0.0495423	0.0318082	-0.0402096
125	-0.0843585	0.661081	0.515293	0.161427	-0.103061	0.0742495	0.155661	-0.0309317	0.128222	-0.177519	0.0207499	0.133949	-0.0201106	-0.127182	0.195875	-0.0916332	0.182535	0.00139614	0.30221	-0.0416634	-0.0329569	0.261227	0.0914481	0.0878207	-0.00452109	-0.146543	-0.0786586	-0.0482324	-0.0544877	0.105001	0.0482219	-0.00235972	0.0528013	0.00839553	-0.0384503	-0.00526787	-0.0020056	-0.0887014	-0.0521445	0.0544056	0.0614351	-0.06821	0.0350981	-0.0272469	0.000502608	-0.019794	-0.0407672	0.0571684	0.0269243
126	0.108574	0.382226	0.485287	0.096709	-0.0387394	-0.0703137	-0.0782034	-0.0239673	0.217107	-0.346432	-0.134393	-0.0358548	-0.0708944	-0.185476	0.220129	-0.0631561	0.0251009	0.069634	0.178021	-0.101465	0.0579424	0.10887	0.00915022	0.0265774	0.121907	-0.0814407	0.104849	0.0929326	-0.113668	0.0115989	-0.0294729	-0.019743	0.0780654	-0.0529758	-0.0428194	-0.0947468	0.0355128	0.0473659	0.128247	0.0276967	0.0505704	-0.0211551	-0.00459098	0.0630734	-0.0563966	-0.0187445	-0.0340385	0.000999106	-0.0880004
127	-0.0129825	0.589274	0.535741	0.10992	-0.0837879	-0.0356778	0.0969927	-0.234634	0.195496	-0.287939	-0.115954	-0.00154724	0.125808	0.0414953	0.376636	-0.032242	0.00110332	0.205874	-0.0683344	0.054371	-0.0116396	-0.123236	-0.112874	-0.116265	0.0292737	0.00523416	0.133712	0.102802	-0.0357653	0.0434139	0.0833253	-0.0200676	-0.0535921	0.0743813	-0.0873489	0.0522232	0.00731344	-0.0509738	0.0480798	-0.0375264	-0.00715126	0.0701741	0.0553352	0.0264426	-0.0224674	-0.0383323	0.0913945	-0.124017	-0.0271929
128	0.131576	0.409553	0.470338	-0.0595083	-0.0484819	0.0834044	-0.052191	-0.232111	0.0935074	-0.367954	-0.175923	-0.072698	0.116964	0.012489	0.25204	-0.0726609	-0.0168499	0.124861	-0.0260468	0.0439511	-0.115641	-0.206016	-0.110425	-0.102665	-0.107127	0.369813	0.16506	0.05332	-0.0662698	0.019675	-0.0295132	0.122053	0.0033126	0.0391936	-0.0600605	0.162837	0.143151	-0.103046	0.0187038	0.0433867	0.0337566	-0.108144	-0.0076714	-0.104578	-0.131152	-0.00261709	-0.015812	0.0211762	-0.0361653
129	-0.287092	0.156649	0.309106	0.114723	0.223322	-0.0447939	0.345064	0.144583	0.16779	0.00546232	-0.131588	-0.184269	-0.0392478	-0.0900825	0.0406417	0.214507	0.0794815	-0.228909	0.149126	-0.203619	-0.0892664	-0.0598863	-0.0295815	0.174635	0.201898	-0.0275402	0.0798286	0.111419	-0.153468	0.0112608	0.233016	0.218363	0.0991965	-0.107061	0.0608074	0.0188241	0.0865791	-0.320996	-0.0667611	0.0713828	0.0573168	-0.0290865	0.00256592	-0.00419155	0.0287049	-0.0261135	-0.131271	-0.048433	-0.0791431
[truncated: 77 more columns]

## Sheet: DATA
	A		B		C		D		E		F		G		H		I		L		M		N
1	241	251	200	208	164	188	124	132	268	269	152	180	115	115	179	187	176	198	182	198	200	200	198	198
2	232	249	208	214	174	186	120	156	268	268	126	185	0	0	181	181	192	220	180	180	202	202	190	192
3	241	251	200	208	164	188	130	132	268	269	152	180	115	115	179	187	176	198	182	198	200	200	198	198
4	249	255	208	208	0	0	130	130	246	246	126	152	115	117	175	187	176	222	190	200	200	200	190	192
5	249	251	208	208	164	174	120	120	246	246	152	180	117	117	175	187	212	220	190	200	202	202	190	192
6	241	245	198	202	174	174	120	120	246	246	152	152	115	123	181	187	174	178	190	198	200	200	192	194
7	249	251	208	208	164	198	122	142	246	246	126	176	115	117	179	187	176	222	206	219	194	200	192	198
8	249	251	208	208	164	204	122	142	246	246	126	152	115	117	179	187	176	222	190	200	200	200	190	192
9	249	251	208	208	164	198	122	142	246	246	126	176	115	117	179	187	176	222	206	219	194	200	192	198
10	232	232	198	208	174	196	120	156	246	246	176	185	0	0	179	187	176	222	190	190	200	200	190	192
11	251	255	208	208	164	196	122	142	246	246	126	176	117	117	179	185	176	222	200	200	198	206	192	192
12	251	255	204	208	174	174	122	142	259	259	126	148	115	115	177	179	182	222	190	206	194	202	192	198
13	245	251	208	208	196	198	122	142	246	246	126	152	117	117	175	187	176	222	190	219	196	202	190	192
14	247	255	208	208	0	0	120	130	246	246	126	152	115	115	175	187	176	222	190	200	200	200	190	192
15	232	241	200	210	164	178	120	132	259	259	152	180	117	117	179	187	176	182	182	200	200	200	192	192
16	241	255	204	208	174	178	120	130	259	259	148	152	115	115	175	177	176	182	190	200	200	200	192	192
17	241	255	204	208	174	178	120	130	259	259	148	152	115	115	175	177	176	182	190	200	202	202	192	192
18	241	255	204	208	174	178	120	130	259	259	148	152	0	0	175	177	176	182	190	200	200	200	192	192
19	241	241	204	208	178	208	120	122	246	246	148	176	117	117	175	187	176	214	190	190	194	194	192	198
20	249	251	210	214	164	194	120	120	246	246	172	180	0	0	179	181	182	222	190	198	0	0	190	192
21	241	245	206	210	174	184	124	156	268	268	126	174	115	115	175	181	222	222	190	190	200	200	190	192
22	232	249	208	214	174	186	156	156	268	268	126	176	0	0	179	179	190	222	190	190	200	200	190	192
23	241	255	204	208	174	178	120	130	259	259	148	152	115	115	175	177	176	182	190	200	200	200	192	192
24	239	245	200	208	184	208	0	0	246	268	152	156	119	119	179	181	178	218	182	198	194	200	192	198
25	245	255	198	208	174	194	122	130	268	268	126	176	115	117	175	187	178	214	200	207	200	200	192	194
26	241	255	204	208	174	178	122	130	259	259	148	152	115	115	175	177	176	182	190	200	200	200	192	192
27	232	241	206	208	178	196	130	156	268	268	148	191	0	0	173	175	182	182	190	190	202	206	192	192
28	232	232	206	210	178	186	120	120	268	268	180	185	0	0	169	207	174	196	182	192	202	212	192	192
29	241	249	208	220	174	182	132	156	268	268	126	181	0	0	179	179	174	190	182	190	206	206	192	192
30	241	241	200	204	178	204	130	156	259	259	150	181	0	0	181	187	178	218	182	182	198	198	192	192
31	232	245	208	208	174	186	122	156	268	268	126	174	0	0	175	179	190	190	190	190	0	0	192	192
32	232	245	202	214	174	174	122	156	268	269	126	126	115	115	175	179	218	218	190	190	200	200	190	192
33	245	249	202	214	184	186	120	156	268	268	126	187	115	115	175	179	190	190	190	190	0	0	190	192
34	241	249	208	214	186	210	0	0	246	246	176	185	117	117	179	179	212	222	184	190	200	200	192	192
35	232	247	208	214	186	186	130	156	268	268	185	191	139	139	0	0	190	198	182	190	200	200	190	192
36	232	249	202	208	186	186	122	156	259	259	181	185	129	129	171	179	190	222	182	190	206	206	190	192
37	241	241	202	202	0	0	130	132	268	268	165	172	0	0	171	179	174	190	182	190	204	204	192	192
38	232	245	208	214	182	184	122	156	268	268	126	174	109	115	175	177	180	218	190	192	200	200	192	192
39	232	241	214	214	182	208	122	130	268	268	138	154	111	111	177	185	182	192	182	182	0	0	192	192
40	241	255	208	220	174	196	120	130	246	268	152	160	117	117	175	175	170	222	200	200	202	216	190	192
41	232	245	208	214	184	186	120	132	259	259	126	167	0	0	179	179	178	190	190	192	200	200	190	192
42	247	257	208	210	186	194	126	144	271	271	150	176	117	185	173	179	0	0	191	203	196	198	190	194
43	243	247	204	210	0	0	124	124	251	275	126	176	117	143	179	185	0	0	193	206	198	198	196	198
44	237	243	198	204	166	198	124	124	251	271	126	146	109	117	179	191	176	182	191	206	192	192	194	198
45	249	251	206	210	178	204	0	0	251	262	144	150	117	117	173	177	0	0	191	192	192	192	190	190
46	232	239	198	198	185	192	120	130	251	271	126	160	129	129	173	173	176	188	190	192	198	198	188	198
47	239	239	200	200	194	204	118	130	246	266	160	160	129	175	173	173	176	188	182	192	198	198	198	198
48	243	253	198	206	162	162	120	120	257	266	150	176	107	117	177	177	210	216	198	200	198	198	182	194
49	237	243	198	206	182	182	120	120	246	266	150	156	117	143	177	179	176	216	182	198	198	198	182	194
50	243	243	198	206	184	184	122	130	246	269	150	174	115	185	171	181	172	216	190	190	198	198	182	198
51	243	253	198	206	184	184	156	156	246	246	150	174	143	143	177	181	176	198	182	182	192	198	190	190
52	239	253	198	208	166	166	120	124	246	266	150	172	129	179	169	173	176	180	198	218	200	200	182	194
53	232	249	206	208	194	208	120	120	246	266	126	154	115	115	165	173	176	210	198	200	198	198	182	190
54	232	253	206	206	172	172	120	122	246	266	124	176	113	115	171	185	172	176	198	200	192	198	182	190
55	237	243	206	206	162	182	120	120	246	266	126	156	115	143	179	179	210	216	198	206	192	198	194	194
56	232	243	206	206	162	194	120	120	246	246	156	176	115	115	171	177	174	216	198	199	192	198	182	194
57	232	253	204	208	194	194	120	120	246	266	146	176	115	143	171	177	208	218	199	206	198	198	182	190
58	232	239	202	214	186	206	110	113	246	266	144	154	185	185	171	201	172	180	193	199	192	192	182	190
59	243	243	198	206	172	172	120	120	246	269	144	150	109	109	159	173	176	176	182	198	198	198	194	194
60	239	243	198	198	182	182	120	156	246	246	150	174	115	115	177	181	174	198	198	218	198	198	182	194
61	232	253	194	206	162	198	122	140	246	246	126	154	115	115	179	181	176	176	192	218	198	198	182	198
62	243	243	198	206	184	184	124	130	246	269	150	174	115	115	171	181	172	216	190	191	198	198	182	198
63	249	253	202	208	162	182	122	140	246	266	170	170	113	115	171	177	174	176	182	200	192	198	182	194
64	237	243	198	206	180	188	120	120	246	266	150	154	117	143	177	179	176	216	198	198	192	198	182	182
65	243	253	198	206	186	206	120	122	246	246	150	150	113	113	173	177	176	198	182	182	192	198	182	182
66	243	249	202	206	162	172	120	122	246	246	150	176	115	143	173	177	172	210	199	206	192	198	182	194
67	249	253	202	206	162	162	120	140	246	266	150	176	113	143	177	185	174	216	200	200	192	198	182	182
68	243	253	198	206	182	194	120	156	246	246	150	174	143	143	177	181	176	198	198	218	198	198	182	194
69	243	255	198	206	172	172	120	120	246	269	150	150	109	143	177	177	176	176	182	198	198	198	194	194
70	243	243	198	206	162	162	120	120	246	266	150	154	143	165	175	177	210	216	198	198	200	200	194	194
71	241	241	198	202	172	186	118	122	246	246	150	165	117	117	175	177	210	216	192	206	200	200	194	198
72	232	253	198	202	182	182	120	140	246	266	150	156	117	143	177	179	176	216	182	198	192	198	182	194
73	232	253	198	202	186	194	120	122	246	246	150	172	109	113	163	185	176	182	193	198	198	198	182	194
74	243	243	198	208	172	172	120	124	246	269	150	154	165	185	175	177	176	216	192	198	200	200	194	198
75	232	243	198	202	162	194	118	118	246	246	150	150	115	143	171	177	172	176	198	198	192	192	190	194
76	239	243	202	202	184	194	120	122	246	269	150	174	143	143	177	181	198	210	182	218	200	214	182	182
77	243	243	204	208	162	186	118	122	246	266	150	165	115	115	175	177	170	174	192	206	0	0	194	198
78	239	253	202	202	182	194	120	156	246	269	126	174	115	115	175	181	198	210	182	218	200	214	182	182
79	232	243	202	202	184	206	120	124	246	257	146	150	113	113	179	185	176	216	192	206	198	204	182	194
80	239	239	194	208	172	196	120	120	257	266	124	172	109	113	173	177	172	176	192	198	192	198	186	190
81	243	249	202	202	162	172	120	120	246	266	150	176	115	185	171	181	176	216	190	200	198	198	186	188
82	243	253	202	202	162	206	120	120	257	266	150	154	107	143	177	177	210	216	198	200	198	204	182	194
83	239	243	204	208	162	182	120	130	246	266	120	144	115	115	171	173	176	182	182	192	192	198	182	190
84	243	249	202	202	194	206	120	120	246	266	146	162	115	115	171	181	210	216	192	218	198	198	182	182
85	237	243	202	208	194	206	120	130	266	266	146	150	115	143	163	179	176	216	198	218	198	198	182	194
86	232	253	202	212	194	206	120	124	246	269	170	170	115	115	171	181	172	216	193	218	200	206	190	190
87	237	243	198	202	182	210	120	124	246	266	150	156	117	143	177	177	176	216	182	198	192	198	182	194
88	232	243	194	208	172	206	120	120	246	266	146	150	143	143	171	171	176	216	192	198	192	198	194	198
89	239	243	202	214	162	182	120	124	246	266	126	148	115	115	177	181	210	210	192	206	192	192	182	196
90	243	253	198	202	172	172	120	120	246	269	144	150	109	143	159	173	176	176	182	198	198	198	194	194
91	239	253	202	202	186	196	120	156	246	269	126	174	115	115	177	177	198	210	182	218	198	198	182	182
92	232	243	202	202	186	206	120	120	257	266	146	150	113	117	171	179	174	188	192	206	198	198	182	194
93	243	245	202	208	172	186	120	120	257	266	124	154	113	117	179	185	174	188	192	206	198	198	182	194
94	237	243	198	202	172	182	120	120	246	266	150	156	117	129	187	187	174	216	182	182	194	200	182	194
95	237	243	198	202	172	182	120	120	246	266	150	156	117	129	185	185	174	216	182	182	192	198	182	194
96	232	249	200	208	174	178	120	122	246	246	124	126	117	171	173	179	0	0	182	182	198	198	186	198
97	232	232	200	200	162	192	122	140	246	246	0	0	117	117	173	179	206	216	182	182	192	198	186	188
98	232	249	200	210	186	192	120	120	246	246	154	156	117	181	173	179	0	0	192	200	192	198	0	0
99	245	249	200	200	174	192	122	140	246	246	0	0	117	181	177	177	208	216	190	198	192	198	186	196
100	245	249	200	210	162	206	0	0	246	246	124	124	117	117	171	177	206	216	182	182	198	198	186	188
101	245	249	200	200	174	198	122	140	246	246	0	0	117	157	171	177	0	0	192	203	192	198	0	0
102	249	253	200	200	186	192	122	140	246	246	124	124	117	157	171	175	170	174	182	182	192	198	186	198
103	0	0	200	200	162	192	122	140	246	266	124	154	117	157	175	179	216	218	190	200	192	198	186	188
104	245	249	200	200	174	192	0	0	246	266	124	126	117	181	177	177	208	216	182	182	198	198	186	188
105	245	249	200	208	178	186	0	0	246	246	140	140	117	181	173	179	214	216	182	193	192	192	188	198
106	245	249	200	200	174	192	122	122	246	266	124	126	117	181	177	177	216	216	190	198	198	198	186	188
107	232	249	200	208	178	204	122	122	246	246	0	0	117	169	171	177	214	216	192	198	198	198	188	198
108	245	249	200	208	0	0	120	120	246	246	124	154	117	181	177	177	214	216	182	193	192	192	188	198
109	232	245	200	208	198	204	120	120	246	246	124	154	155	179	171	177	174	206	192	192	198	198	194	194
110	249	253	200	200	186	192	122	140	246	246	126	176	117	159	175	179	174	204	0	0	198	198	186	202
111	232	245	200	208	192	206	120	120	246	246	124	156	159	181	171	177	214	216	182	193	192	198	186	198
112	245	249	200	208	0	0	120	120	246	246	126	156	117	181	177	177	214	216	182	193	192	198	186	198
113	245	249	200	210	0	0	120	120	246	246	124	124	117	117	171	177	214	216	0	0	196	198	0	0
114	232	249	200	208	0	0	120	120	246	246	124	126	117	171	171	177	214	216	0	0	198	198	188	188
115	0	0	200	208	192	210	120	120	246	246	124	156	117	181	171	177	174	204	0	0	192	198	0	0
116	0	0	208	210	0	0	120	120	246	246	0	0	117	117	116	116	172	216	0	0	192	198	0	0
117	245	249	200	208	178	186	120	120	246	246	126	154	117	189	116	188	214	216	192	198	192	192	188	188
118	237	251	204	210	174	198	120	120	246	246	124	154	117	143	116	142	214	216	0	0	192	192	0	0
119	0	0	200	200	188	192	122	140	246	266	0	0	117	159	116	159	0	0	0	0	192	198	0	0
120	232	232	200	200	162	192	122	140	246	246	0	0	117	161	116	160	216	218	0	0	0	0	0	0
121	232	245	200	208	0	0	120	120	0	0	124	154	0	0	0	0	214	216	0	0	0	0	0	0
122	232	249	200	208	178	204	120	120	246	246	124	126	117	171	116	169	214	216	0	0	0	0	0	0
123	245	249	200	210	0	0	0	0	0	0	124	124	117	117	116	116	0	0	0	0	194	200	0	0
124	245	249	200	210	178	186	120	120	0	0	124	154	117	117	116	116	214	216	0	0	0	0	186	188
125	245	249	200	208	178	186	120	120	0	0	126	154	117	181	116	179	214	216	192	198	0	0	190	192
126	245	249	200	208	178	186	120	120	0	0	124	124	117	181	116	179	0	0	192	198	0	0	0	0
127	232	245	200	208	192	204	120	120	0	0	124	124	159	181	159	179	0	0	190	192	0	0	186	192
128	237	243	198	200	182	206	120	120	0	0	0	0	117	143	116	142	212	214	182	198	192	192	188	194

## Sheet: D
12	129	4	42	4	50	33	1	129
Codominant data template			Pop1	Pop2	Pop3	Pop4		Region1
Sample	Pop	Locus1		Locus2		Locus3		Locus4		Locus5		Locus6		Locus7		Locus8		Locus9		Locus10		Locus11		Locus12
1	Alegria	241	251	200	208	164	188	124	132	268	269	152	180	115	115	179	187	176	198	182	198	200	200	198	198
2	Alegria	249	255	0	0	0	0	124	124	0	0	126	152	0	0	0	0	176	176	0	0	0	0	190	192
3	Alegria	232	249	208	214	174	186	120	156	268	268	126	185	0	0	181	181	192	220	180	180	202	202	190	192
4	Alegria	241	251	200	208	164	188	130	132	268	269	152	180	115	115	179	187	176	198	182	198	200	200	198	198
5	Alegria	249	255	208	208	0	0	130	130	246	246	126	152	115	117	175	187	176	222	190	200	200	200	190	192
6	Alegria	249	251	208	208	164	174	120	120	246	246	152	180	117	117	175	187	212	220	190	200	202	202	190	192
7	Alegria	241	245	198	202	174	174	120	120	246	246	152	152	115	123	181	187	174	178	190	198	200	200	192	194
8	Alegria	249	251	208	208	164	198	122	142	246	246	126	176	115	117	179	187	176	222	206	219	194	200	192	198
9	Alegria	249	251	208	208	164	204	122	142	246	246	126	152	115	117	179	187	176	222	190	200	200	200	190	192
10	Alegria	249	251	208	208	164	198	122	142	246	246	126	176	115	117	179	187	176	222	206	219	194	200	192	198
11	Alegria	232	232	198	208	174	196	120	156	246	246	176	185	0	0	179	187	176	222	190	190	200	200	190	192
12	Alegria	251	255	208	208	164	196	122	142	246	246	126	176	117	117	179	185	176	222	200	200	198	206	192	192
13	Alegria	251	255	204	208	174	174	122	142	259	259	126	148	115	115	177	179	182	222	190	206	194	202	192	198
14	Alegria	245	251	208	208	196	198	122	142	246	246	126	152	117	117	175	187	176	222	190	219	196	202	190	192
15	Alegria	247	255	208	208	0	0	120	130	246	246	126	152	115	115	175	187	176	222	190	200	200	200	190	192
16	Alegria	232	241	200	210	164	178	120	132	259	259	152	180	117	117	179	187	176	182	182	200	200	200	192	192
17	Alegria	241	255	204	208	174	178	120	130	259	259	148	152	115	115	175	177	176	182	190	200	200	200	192	192
18	Alegria	241	255	204	208	174	178	120	130	259	259	148	152	115	115	175	177	176	182	190	200	202	202	192	192
19	Alegria	241	255	204	208	174	178	120	130	259	259	148	152	0	0	175	177	176	182	190	200	200	200	192	192
20	Alegria	241	241	204	208	178	208	120	122	246	246	148	176	117	117	175	187	176	214	190	190	194	194	192	198
21	Alegria	249	251	210	214	164	194	120	120	246	246	172	180	0	0	179	181	182	222	190	198	0	0	190	192
22	Alegria	241	245	206	210	174	184	124	156	268	268	126	174	115	115	175	181	222	222	190	190	200	200	190	192
23	Alegria	232	249	208	214	174	186	156	156	268	268	126	176	0	0	179	179	190	222	190	190	200	200	190	192
24	Alegria	241	255	204	208	174	178	120	130	259	259	148	152	115	115	175	177	176	182	190	200	200	200	192	192
25	Alegria	239	245	200	208	184	208	0	0	246	268	152	156	119	119	179	181	178	218	182	198	194	200	192	198
26	Alegria	245	255	198	208	174	194	122	130	268	268	126	176	115	117	175	187	178	214	200	207	200	200	192	194
27	Alegria	241	255	204	208	174	178	122	130	259	259	148	152	115	115	175	177	176	182	190	200	200	200	192	192
28	Alegria	232	241	206	208	178	196	130	156	268	268	148	191	0	0	173	175	182	182	190	190	202	206	192	192
29	Alegria	232	232	206	210	178	186	120	120	268	268	180	185	0	0	169	207	174	196	182	192	202	212	192	192
30	Alegria	241	249	208	220	174	182	132	156	268	268	126	181	0	0	179	179	174	190	182	190	206	206	192	192
31	Alegria	241	241	200	204	178	204	130	156	259	259	150	181	0	0	181	187	178	218	182	182	198	198	192	192
32	Alegria	232	245	208	208	174	186	122	156	268	268	126	174	0	0	175	179	190	190	190	190	0	0	192	192
33	Alegria	232	245	202	214	174	174	122	156	268	269	126	126	115	115	175	179	218	218	190	190	200	200	190	192
34	Alegria	245	249	202	214	184	186	120	156	268	268	126	187	115	115	175	179	190	190	190	190	0	0	190	192
35	Alegria	241	249	208	214	186	210	0	0	246	246	176	185	117	117	179	179	212	222	184	190	200	200	192	192
36	Alegria	232	247	208	214	186	186	130	156	268	268	185	191	139	139	0	0	190	198	182	190	200	200	190	192
37	Alegria	232	249	202	208	186	186	122	156	259	259	181	185	129	129	171	179	190	222	182	190	206	206	190	192
38	Alegria	241	241	202	202	0	0	130	132	268	268	165	172	0	0	171	179	174	190	182	190	204	204	192	192
39	Alegria	232	245	208	214	182	184	122	156	268	268	126	174	109	115	175	177	180	218	190	192	200	200	192	192
40	Alegria	232	241	214	214	182	208	122	130	268	268	138	154	111	111	177	185	182	192	182	182	0	0	192	192
41	Alegria	241	255	208	220	174	196	120	130	246	268	152	160	117	117	175	175	170	222	200	200	202	216	190	192
42	Alegria	232	245	208	214	184	186	120	132	259	259	126	167	0	0	179	179	178	190	190	192	200	200	190	192
43	Malta	247	257	208	210	186	194	126	144	271	271	150	176	117	185	173	179	0	0	191	203	196	198	190	194
44	Malta	243	247	204	210	0	0	124	124	251	275	126	176	117	143	179	185	0	0	193	206	198	198	196	198
45	Malta	237	243	198	204	166	198	124	124	251	271	126	146	109	117	179	191	176	182	191	206	192	192	194	198
46	Malta	249	251	206	210	178	204	0	0	251	262	144	150	117	117	173	177	0	0	191	192	192	192	190	190
47	Italy	232	239	198	198	185	192	120	130	251	271	126	160	129	129	173	173	176	188	190	192	198	198	188	198
48	Italy	239	239	200	200	194	204	118	130	246	266	160	160	129	175	173	173	176	188	182	192	198	198	198	198
49	Italy	243	253	198	206	162	162	120	120	257	266	150	176	107	117	177	177	210	216	198	200	198	198	182	194
50	Italy	237	243	198	206	182	182	120	120	246	266	150	156	117	143	177	179	176	216	182	198	198	198	182	194
51	Italy	243	243	198	206	184	184	122	130	246	269	150	174	115	185	171	181	172	216	190	190	198	198	182	198
52	Italy	243	253	198	206	184	184	156	156	246	246	150	174	143	143	177	181	176	198	182	182	192	198	190	190
53	Italy	239	253	198	208	166	166	120	124	246	266	150	172	129	179	169	173	176	180	198	218	200	200	182	194
54	Italy	232	249	206	208	194	208	120	120	246	266	126	154	115	115	165	173	176	210	198	200	198	198	182	190
55	Italy	232	253	206	206	172	172	120	122	246	266	124	176	113	115	171	185	172	176	198	200	192	198	182	190
56	Italy	237	243	206	206	162	182	120	120	246	266	126	156	115	143	179	179	210	216	198	206	192	198	194	194
57	Italy	232	243	206	206	162	194	120	120	246	246	156	176	115	115	171	177	174	216	198	199	192	198	182	194
58	Italy	232	253	204	208	194	194	120	120	246	266	146	176	115	143	171	177	208	218	199	206	198	198	182	190
59	Italy	232	239	202	214	186	206	110	113	246	266	144	154	185	185	171	201	172	180	193	199	192	192	182	190
60	Italy	243	243	198	206	172	172	120	120	246	269	144	150	109	109	159	173	176	176	182	198	198	198	194	194
61	Italy	239	243	198	198	182	182	120	156	246	246	150	174	115	115	177	181	174	198	198	218	198	198	182	194
62	Italy	232	253	194	206	162	198	122	140	246	246	126	154	115	115	179	181	176	176	192	218	198	198	182	198
63	Italy	243	243	198	206	184	184	124	130	246	269	150	174	115	115	171	181	172	216	190	191	198	198	182	198
64	Italy	249	253	202	208	162	182	122	140	246	266	170	170	113	115	171	177	174	176	182	200	192	198	182	194
65	Italy	237	243	198	206	180	188	120	120	246	266	150	154	117	143	177	179	176	216	198	198	192	198	182	182
66	Italy	243	253	198	206	186	206	120	122	246	246	150	150	113	113	173	177	176	198	182	182	192	198	182	182
67	Italy	243	249	202	206	162	172	120	122	246	246	150	176	115	143	173	177	172	210	199	206	192	198	182	194
68	Italy	249	253	202	206	162	162	120	140	246	266	150	176	113	143	177	185	174	216	200	200	192	198	182	182
69	Italy	243	253	198	206	182	194	120	156	246	246	150	174	143	143	177	181	176	198	198	218	198	198	182	194
70	Italy	243	255	198	206	172	172	120	120	246	269	150	150	109	143	177	177	176	176	182	198	198	198	194	194
71	Italy	243	243	198	206	162	162	120	120	246	266	150	154	143	165	175	177	210	216	198	198	200	200	194	194
72	Italy	241	241	198	202	172	186	118	122	246	246	150	165	117	117	175	177	210	216	192	206	200	200	194	198
73	Italy	232	253	198	202	182	182	120	140	246	266	150	156	117	143	177	179	176	216	182	198	192	198	182	194
74	Italy	232	253	198	202	186	194	120	122	246	246	150	172	109	113	163	185	176	182	193	198	198	198	182	194
75	Italy	243	243	198	208	172	172	120	124	246	269	150	154	165	185	175	177	176	216	192	198	200	200	194	198
76	Italy	232	243	198	202	162	194	118	118	246	246	150	150	115	143	171	177	172	176	198	198	192	192	190	194
77	Italy	239	243	202	202	184	194	120	122	246	269	150	174	143	143	177	181	198	210	182	218	200	214	182	182
78	Italy	243	243	204	208	162	186	118	122	246	266	150	165	115	115	175	177	170	174	192	206	0	0	194	198
79	Italy	239	253	202	202	182	194	120	156	246	269	126	174	115	115	175	181	198	210	182	218	200	214	182	182
80	Italy	232	243	202	202	184	206	120	124	246	257	146	150	113	113	179	185	176	216	192	206	198	204	182	194
81	Italy	239	239	194	208	172	196	120	120	257	266	124	172	109	113	173	177	172	176	192	198	192	198	186	190
82	Italy	243	249	202	202	162	172	120	120	246	266	150	176	115	185	171	181	176	216	190	200	198	198	186	188
83	Italy	243	253	202	202	162	206	120	120	257	266	150	154	107	143	177	177	210	216	198	200	198	204	182	194
84	Italy	239	243	204	208	162	182	120	130	246	266	120	144	115	115	171	173	176	182	182	192	192	198	182	190
85	Italy	243	249	202	202	194	206	120	120	246	266	146	162	115	115	171	181	210	216	192	218	198	198	182	182
86	Italy	237	243	202	208	194	206	120	130	266	266	146	150	115	143	163	179	176	216	198	218	198	198	182	194
87	Italy	232	253	202	212	194	206	120	124	246	269	170	170	115	115	171	181	172	216	193	218	200	206	190	190
88	Italy	237	243	198	202	182	210	120	124	246	266	150	156	117	143	177	177	176	216	182	198	192	198	182	194
89	Italy	232	243	194	208	172	206	120	120	246	266	146	150	143	143	171	171	176	216	192	198	192	198	194	198
90	Italy	239	243	202	214	162	182	120	124	246	266	126	148	115	115	177	181	210	210	192	206	192	192	182	196
91	Italy	243	253	198	202	172	172	120	120	246	269	144	150	109	143	159	173	176	176	182	198	198	198	194	194
92	Italy	239	253	202	202	186	196	120	156	246	269	126	174	115	115	177	177	198	210	182	218	198	198	182	182
93	Italy	232	243	202	202	186	206	120	120	257	266	146	150	113	117	171	179	174	188	192	206	198	198	182	194
94	Italy	243	245	202	208	172	186	120	120	257	266	124	154	113	117	179	185	174	188	192	206	198	198	182	194
95	Italy	237	243	198	202	172	182	120	120	246	266	150	156	117	129	187	187	174	216	182	182	194	200	182	194
96	Italy	237	243	198	202	172	182	120	120	246	266	150	156	117	129	185	185	174	216	182	182	192	198	182	194
97	Syria	232	249	200	208	174	178	120	122	246	246	124	126	117	171	173	179	0	0	182	182	198	198	186	198
98	Syria	232	232	200	200	162	192	122	140	246	246	0	0	117	117	173	179	206	216	182	182	192	198	186	188
99	Syria	232	249	200	210	186	192	120	120	246	246	154	156	117	181	173	179	0	0	192	200	192	198	0	0
100	Syria	245	249	200	200	174	192	122	140	246	246	0	0	117	181	177	177	208	216	190	198	192	198	186	196
101	Syria	245	249	200	210	162	206	0	0	246	246	124	124	117	117	171	177	206	216	182	182	198	198	186	188
102	Syria	245	249	200	200	174	198	122	140	246	246	0	0	117	157	171	177	0	0	192	203	192	198	0	0
103	Syria	249	253	200	200	186	192	122	140	246	246	124	124	117	157	171	175	170	174	182	182	192	198	186	198
104	Syria	0	0	200	200	162	192	122	140	246	266	124	154	117	157	175	179	216	218	190	200	192	198	186	188
105	Syria	245	249	200	200	174	192	0	0	246	266	124	126	117	181	177	177	208	216	182	182	198	198	186	188
106	Syria	245	249	200	208	178	186	0	0	246	246	140	140	117	181	173	179	214	216	182	193	192	192	188	198
107	Syria	245	249	200	200	174	192	122	122	246	266	124	126	117	181	177	177	216	216	190	198	198	198	186	188
108	Syria	232	249	200	208	178	204	122	122	246	246	0	0	117	169	171	177	214	216	192	198	198	198	188	198
109	Syria	245	249	200	208	0	0	120	120	246	246	124	154	117	181	177	177	214	216	182	193	192	192	188	198
110	Syria	232	245	200	208	198	204	120	120	246	246	124	154	155	179	171	177	174	206	192	192	198	198	194	194
111	Syria	249	253	200	200	186	192	122	140	246	246	126	176	117	159	175	179	174	204	0	0	198	198	186	202
112	Syria	232	245	200	208	192	206	120	120	246	246	124	156	159	181	171	177	214	216	182	193	192	198	186	198
113	Syria	245	249	200	208	0	0	120	120	246	246	126	156	117	181	177	177	214	216	182	193	192	198	186	198
114	Syria	245	249	200	210	0	0	120	120	246	246	124	124	117	117	171	177	214	216	0	0	196	198	0	0
115	Syria	232	249	200	208	0	0	120	120	246	246	124	126	117	171	171	177	214	216	0	0	198	198	188	188
116	Syria	0	0	200	208	192	210	120	120	246	246	124	156	117	181	171	177	174	204	0	0	192	198	0	0
117	Syria	0	0	208	210	0	0	120	120	246	246	0	0	117	117	116	116	172	216	0	0	192	198	0	0
118	Syria	245	249	200	208	178	186	120	120	246	246	126	154	117	189	116	188	214	216	192	198	192	192	188	188
119	Syria	237	251	204	210	174	198	120	120	246	246	124	154	117	143	116	142	214	216	0	0	192	192	0	0
120	Syria	0	0	200	200	188	192	122	140	246	266	0	0	117	159	116	159	0	0	0	0	192	198	0	0
121	Syria	232	232	200	200	162	192	122	140	246	246	0	0	117	161	116	160	216	218	0	0	0	0	0	0
122	Syria	232	245	200	208	0	0	120	120	0	0	124	154	0	0	0	0	214	216	0	0	0	0	0	0
123	Syria	232	249	200	208	178	204	120	120	246	246	124	126	117	171	116	169	214	216	0	0	0	0	0	0
124	Syria	245	249	200	210	0	0	0	0	0	0	124	124	117	117	116	116	0	0	0	0	194	200	0	0
125	Syria	245	249	200	210	178	186	120	120	0	0	124	154	117	117	116	116	214	216	0	0	0	0	186	188
126	Syria	245	249	200	208	178	186	120	120	0	0	126	154	117	181	116	179	214	216	192	198	0	0	190	192
127	Syria	245	249	200	208	178	186	120	120	0	0	124	124	117	181	116	179	0	0	192	198	0	0	0	0
128	Syria	232	245	200	208	192	204	120	120	0	0	124	124	159	181	159	179	0	0	190	192	0	0	186	192
129	Syria	237	243	198	200	182	206	120	120	0	0	0	0	117	143	116	142	212	214	182	198	192	192	188	194

## Sheet: GD (2)
12	128	4	41	4	50	33	1	128
Raw Data Check Statistics	DATA	Codominant Genotypic Distance	Pop1	Pop2	Pop3	Pop4
1	2	3	4	5	6	7	8	9	10	11	12	13	14	15	16	17	18	19	20	21	22	23	24	25	26	27	28	29	30	31	32	33	34	35	36	37	38	39	40	41	42	43	44	45	46	47	48	49	50
0
29	0
1	29	0
21	28	19	0
25	21	25	16	0
21	27	21	20	19	0
16	26	16	13	16	22	0
16	26	16	8	13	18	6	0
16	26	16	13	16	22	0	6	0
24	21	24	17	20	17	17	14	17	0
26	29	26	16	16	28	10	10	10	21	0
21	25	21	23	23	24	15	18	15	24	21	0
24	25	24	17	15	26	13	13	13	22	15	20	0
19	28	18	7	21	21	18	13	18	20	22	21	15	0
17	29	17	21	20	21	20	17	20	21	20	23	22	22	0
19	28	18	15	22	17	21	17	21	21	23	12	23	13	13	0
23	24	22	19	18	21	23	21	23	25	23	10	21	17	17	4	0
23	24	22	17	22	19	23	19	23	17	23	16	23	17	13	4	8	0
25	31	25	24	21	26	19	22	19	24	23	22	15	21	21	20	20	20	0
26	21	26	28	22	25	24	23	24	21	27	25	22	23	23	26	26	22	24	0
20	23	21	20	28	20	23	19	23	20	29	20	23	18	25	18	22	22	26	25	0
24	16	24	22	27	26	21	18	21	11	26	23	25	23	25	24	28	20	28	21	15	0
19	28	18	15	22	17	21	17	21	21	23	12	23	13	13	0	4	4	20	26	18	24	0
18	25	18	23	25	20	19	20	19	24	24	24	24	25	22	24	26	24	25	26	23	24	24	0
19	23	18	15	22	18	17	16	17	21	19	20	19	16	20	16	20	18	22	28	16	19	16	20	0
19	29	18	15	24	19	20	16	20	22	22	11	22	14	14	1	5	5	20	28	18	24	1	24	15	0
28	19	27	25	25	29	27	26	27	19	26	23	23	26	24	19	17	15	22	23	20	17	19	26	22	19	0
28	16	28	32	25	27	29	30	29	21	30	29	29	30	21	26	24	22	29	21	26	22	26	26	25	28	17	0
24	19	24	27	27	27	23	23	23	21	23	23	26	28	24	25	25	21	27	23	22	12	25	23	22	25	15	20	0
28	26	27	31	33	29	30	30	30	28	29	26	31	32	20	21	21	17	27	27	29	28	21	24	28	21	22	24	21	0
29	19	29	26	26	29	24	23	24	19	25	23	22	26	29	25	25	21	26	22	20	11	25	25	20	24	15	21	13	28	0
22	24	22	22	28	20	23	19	23	19	29	18	24	20	26	19	23	23	28	28	12	14	19	24	16	18	24	29	22	31	19	0
25	22	25	25	26	25	25	23	25	25	30	23	25	23	29	23	23	27	27	20	15	15	23	25	21	24	22	25	19	32	12	15	0
25	28	25	18	20	23	15	14	15	17	17	26	23	25	19	23	27	23	23	26	24	18	23	19	22	23	27	29	23	30	26	25	26	0
23	21	22	23	29	28	26	23	26	21	30	29	27	23	25	24	28	24	30	29	21	15	24	24	20	24	21	22	23	29	20	22	20	23	0
28	24	28	26	27	30	23	22	23	22	24	21	24	27	23	24	24	24	28	26	26	19	24	26	27	23	24	25	18	24	21	25	21	23	20	0
27	26	26	27	33	28	30	30	30	27	31	30	31	28	26	27	27	23	28	26	26	22	27	27	26	27	19	22	15	22	21	28	23	28	26	26	0
21	21	21	20	26	23	20	18	20	20	24	21	21	19	22	17	21	19	25	27	12	15	17	19	13	16	18	21	19	27	15	11	16	22	17	24	25	0
28	25	27	31	33	32	29	30	29	31	29	28	30	32	25	26	26	26	29	25	28	27	26	25	24	25	22	23	23	25	23	28	23	29	23	28	24	19	0
26	23	25	15	12	22	21	18	21	23	15	23	16	19	20	18	16	18	21	26	22	26	18	24	16	19	21	25	24	28	25	26	25	22	26	27	27	23	27	0
23	21	23	23	26	23	22	19	22	15	26	21	24	22	17	19	23	15	28	20	22	12	19	21	21	20	23	21	18	23	17	19	19	20	20	18	24	17	29	27	0
27	28	27	27	26	30	23	24	23	27	24	27	23	27	26	29	29	29	27	26	29	26	29	26	23	29	29	29	28	29	29	30	28	25	26	25	32	28	32	25	25	0
26	32	28	27	31	33	24	28	24	31	25	26	28	27	28	31	31	31	28	30	29	30	31	28	27	31	33	32	30	29	33	31	31	29	32	31	30	30	33	29	29	19	0
23	30	25	28	29	29	21	25	21	28	26	23	24	29	25	27	27	27	26	28	28	29	27	26	24	27	29	31	28	31	31	29	29	28	31	29	32	27	31	27	27	22	18	0
31	31	31	29	26	34	27	25	27	32	29	30	25	32	27	31	31	31	29	28	30	32	31	27	29	31	31	30	33	32	36	33	31	26	32	30	36	30	34	26	30	19	25	23	0
28	30	27	28	30	28	27	28	27	25	29	28	28	28	29	28	28	28	28	29	30	30	28	28	26	29	27	28	31	29	31	29	29	33	30	26	33	27	32	28	27	24	25	23	29	0
25	35	24	30	33	33	27	29	27	32	30	31	32	33	30	32	32	32	32	33	35	36	32	24	30	32	32	33	34	26	37	36	35	34	33	31	35	32	33	29	33	27	28	29	31	14	0
30	31	30	31	26	26	28	29	28	29	26	29	29	30	27	27	27	27	28	27	32	33	27	29	25	29	32	28	33	29	35	34	31	31	33	32	35	29	32	25	30	24	25	26	27	24	29	0
26	30	26	28	24	23	24	25	24	25	24	28	27	29	24	27	27	27	27	25	31	31	27	24	26	29	31	26	27	26	33	32	29	27	31	29	32	27	28	25	27	23	23	22	27	22	25	11	0
26	31	25	26	29	26	25	25	25	26	28	25	28	28	32	27	27	29	27	29	22	30	27	25	26	26	27	32	31	27	29	26	25	30	30	28	31	24	32	29	28	26	25	26	31	22	26	21	19	0
29	29	29	28	29	29	27	26	27	25	29	32	30	32	31	32	32	32	34	31	26	30	32	25	31	32	32	32	31	26	34	32	29	32	28	28	35	27	31	29	30	28	29	27	26	29	29	25	19	19
21	29	22	22	25	20	21	20	21	21	26	28	26	23	24	23	27	23	28	26	26	27	23	22	21	24	29	28	30	31	31	28	30	25	26	27	32	23	32	26	24	24	28	21	29	21	24	21	19	26
23	25	23	21	21	23	20	19	20	23	22	24	25	20	26	22	22	26	27	23	25	28	22	25	23	24	28	25	29	29	30	25	23	29	29	27	34	25	30	23	25	23	26	27	27	20	23	17	16	22
25	28	25	25	25	25	22	22	22	23	22	26	26	25	26	25	25	27	27	26	26	29	25	26	24	25	28	25	31	30	31	27	27	29	29	26	32	26	29	24	27	25	26	25	25	25	27	18	18	20
26	30	26	29	27	23	23	25	23	27	27	25	30	28	28	28	28	30	31	25	28	29	28	25	26	30	31	27	27	32	32	28	26	28	33	30	33	28	33	28	25	25	24	20	29	27	30	15	9	23
26	30	26	27	25	20	23	25	23	24	27	26	31	27	29	25	25	29	30	26	27	32	25	26	25	27	30	24	32	32	34	29	27	29	32	30	33	27	32	27	29	26	28	26	28	27	29	14	14	19
27	27	27	26	23	25	22	24	22	23	25	24	27	25	28	24	24	26	27	24	29	29	24	26	24	26	30	26	31	27	31	27	27	29	29	27	33	25	31	25	26	22	23	26	29	24	25	17	17	23
29	27	29	28	28	28	26	26	26	26	29	29	28	30	29	30	30	30	31	28	30	28	30	26	28	30	30	28	31	32	31	28	27	28	26	24	30	26	28	27	26	24	29	24	24	28	28	28	26	24
29	34	29	32	30	26	29	30	29	29	30	34	32	32	30	31	31	31	32	30	35	37	31	30	30	33	34	30	35	30	38	36	34	35	35	34	37	32	35	31	33	27	29	24	32	23	27	19	14	22
26	30	26	28	28	20	25	26	25	26	28	27	32	29	32	27	27	31	33	29	27	33	27	26	26	28	33	31	30	28	34	30	28	31	32	32	35	25	32	29	32	27	28	27	32	23	27	18	12	17
22	29	22	24	29	26	17	20	17	24	22	23	26	26	28	26	26	30	29	30	26	30	26	25	26	25	31	29	30	29	31	25	27	28	32	29	34	25	31	29	27	27	25	24	31	22	23	23	20	19
23	31	23	26	30	26	25	26	25	28	29	25	30	27	32	26	26	30	30	30	21	32	26	25	26	26	29	32	32	27	32	27	25	31	31	30	32	25	33	29	29	26	23	23	30	23	26	21	19	3
23	28	23	22	24	24	19	19	19	26	21	23	24	24	26	23	23	25	27	28	28	29	23	24	22	22	29	28	25	27	29	27	26	27	28	23	27	23	26	24	28	24	27	23	26	26	25	18	17	22
25	30	25	28	24	23	24	25	24	25	25	28	27	29	25	27	27	27	27	24	31	31	27	25	27	29	31	27	30	30	33	32	29	27	32	30	33	29	31	25	27	25	25	21	25	24	28	12	7	20
28	32	28	29	28	27	25	26	25	27	27	30	30	32	29	30	30	30	31	31	33	34	30	27	29	30	32	28	32	27	34	34	32	30	29	28	34	30	29	29	31	26	30	26	27	25	26	19	15	20
26	28	26	24	23	21	18	21	18	24	23	23	27	27	28	25	25	27	27	26	27	29	25	25	23	25	28	27	29	28	31	27	25	25	30	26	30	25	29	25	28	22	23	22	23	24	25	14	15	17
30	30	30	27	25	26	25	25	25	28	23	29	30	29	28	27	27	27	30	28	31	31	27	28	26	28	31	28	30	30	34	32	29	29	32	29	31	29	31	24	30	26	26	27	26	28	29	11	17	23
27	28	27	27	26	22	24	25	24	24	25	29	29	30	29	28	28	28	30	26	28	31	28	25	26	29	30	29	30	26	32	32	30	29	30	30	34	26	31	27	30	24	24	25	29	23	25	15	9	17
29	34	29	31	30	26	29	30	29	29	29	31	32	31	30	28	28	28	32	30	35	37	28	30	29	30	35	30	35	29	38	36	34	35	35	34	37	31	33	30	33	27	29	26	31	25	29	15	11	23
27	33	27	28	28	20	28	27	28	26	33	32	32	28	28	26	30	26	32	28	29	32	26	27	24	28	33	30	35	35	36	31	32	30	31	34	37	27	34	28	28	29	31	27	32	30	34	12	15	25
23	32	23	22	24	20	19	20	19	24	24	27	25	28	22	24	28	24	22	32	26	29	24	25	20	23	30	31	31	29	32	27	30	19	27	28	28	23	30	21	26	25	28	24	26	28	28	23	22	25
24	28	24	26	24	22	22	23	22	22	23	26	25	28	22	26	26	26	26	25	30	28	26	22	24	27	29	25	25	26	30	28	27	25	28	25	28	24	25	24	25	22	24	20	24	22	25	14	5	22
27	28	27	26	25	21	22	23	22	22	22	27	27	29	26	27	27	27	28	24	31	30	27	25	24	27	28	26	31	27	30	29	28	27	28	25	30	26	28	26	27	22	24	23	30	21	24	18	15	20
19	30	20	22	25	21	21	21	21	22	27	27	26	23	25	22	26	22	27	28	26	28	22	23	21	23	30	29	31	32	31	27	30	26	27	30	34	22	31	25	24	25	26	21	29	25	28	20	18	20
27	32	27	27	29	24	25	25	25	25	29	29	30	30	31	29	29	31	33	29	31	33	29	27	27	29	33	32	34	33	35	30	30	31	32	29	33	29	33	29	31	26	31	23	25	29	29	22	20	23
25	29	25	28	28	23	25	25	25	27	29	28	29	29	27	27	29	27	30	27	27	31	27	23	25	27	32	29	31	29	32	27	28	29	28	27	29	24	29	28	27	27	28	28	30	29	28	22	19	19
23	30	23	25	27	26	20	23	20	29	27	20	26	25	31	23	23	27	27	27	27	31	23	26	23	22	30	29	30	31	25	27	22	29	29	27	32	23	27	25	28	25	26	23	29	29	27	22	23	21
21	27	21	24	27	21	23	23	23	26	29	25	28	23	27	23	25	27	30	27	21	28	23	24	22	24	30	29	28	29	30	20	22	29	27	27	29	21	30	26	27	28	30	28	32	28	28	25	22	23
26	29	27	28	27	24	23	25	23	24	25	27	28	29	26	28	28	28	29	27	29	29	28	25	27	29	30	26	29	29	31	28	26	28	30	26	26	26	30	27	24	24	22	20	29	24	27	20	17	20
26	27	26	27	24	26	25	25	25	25	26	27	24	25	27	25	25	25	27	23	30	30	25	24	27	27	28	26	30	30	31	31	28	31	29	28	32	25	31	24	25	24	28	24	24	20	21	19	19	27
27	27	27	25	23	21	23	23	23	24	24	27	28	25	27	24	24	26	26	24	27	29	24	27	26	26	30	28	30	27	32	27	23	28	31	26	28	28	33	25	28	24	25	27	30	22	26	15	16	16
29	30	29	31	27	24	29	29	29	30	29	28	30	29	28	26	26	26	30	26	32	33	26	28	27	28	32	28	32	30	34	31	28	33	32	29	28	28	30	26	29	26	27	27	29	27	30	7	14	24
21	27	20	20	23	24	20	20	20	24	24	21	24	20	25	19	19	23	26	25	25	29	19	23	23	20	25	26	27	25	30	26	24	28	26	25	29	23	26	23	25	23	25	21	23	20	19	20	16	19
28	29	28	29	27	23	26	27	26	30	30	28	32	28	31	27	27	31	32	26	29	34	27	29	28	29	34	29	33	30	36	29	25	32	34	29	31	29	35	29	30	28	28	29	32	26	27	19	18	19
23	29	22	25	27	25	23	24	23	27	25	25	26	24	27	24	24	26	28	25	29	29	24	25	23	25	29	29	28	26	30	28	26	29	29	27	29	27	31	26	26	21	23	22	30	23	23	16	11	19
22	26	23	24	26	22	24	22	24	23	29	26	28	23	27	24	26	28	31	25	22	28	24	26	24	25	30	28	30	32	33	22	24	29	27	24	31	25	32	26	25	26	28	27	28	29	31	27	26	23
24	29	25	26	24	22	23	24	23	25	24	26	25	28	24	25	25	25	26	26	29	31	25	23	24	26	30	27	28	26	32	30	28	26	29	27	29	25	26	24	28	23	22	17	23	23	25	12	5	20
25	28	25	27	24	24	23	25	23	24	26	28	27	27	27	27	27	27	27	26	32	31	27	25	27	29	30	25	31	30	31	32	30	30	30	27	32	27	32	26	26	25	25	22	28	23	25	19	14	21
25	27	26	27	28	24	23	25	23	29	29	22	29	26	30	24	24	28	30	27	25	31	24	26	26	25	31	29	30	32	33	25	24	30	31	30	32	23	29	28	27	29	25	20	26	27	28	20	21	24
27	32	27	30	28	23	27	28	27	27	28	32	30	30	28	29	29	29	30	28	34	35	29	28	28	31	33	29	33	28	36	33	31	33	33	31	33	31	33	29	31	25	27	24	31	21	25	18	13	23
25	30	25	29	30	26	26	27	26	29	28	25	30	28	31	26	26	30	33	31	27	31	26	28	28	27	32	30	31	28	32	25	24	32	29	27	31	25	31	29	30	28	28	30	32	26	27	19	20	22
29	28	29	31	26	24	26	28	26	27	27	28	28	30	25	29	29	29	28	26	32	29	29	28	27	31	31	23	29	28	31	29	26	28	29	24	27	28	32	26	24	22	23	23	28	22	26	16	15	22
27	27	27	28	23	23	23	25	23	27	23	26	24	27	25	27	27	27	26	25	30	28	27	25	24	29	30	24	27	28	28	29	25	26	28	25	29	26	30	24	22	21	21	23	28	22	25	16	15	23
24	30	24	25	22	18	22	23	22	23	28	29	26	26	21	27	29	27	24	27	30	31	27	23	22	29	32	25	28	28	34	30	29	27	28	26	29	27	28	25	27	26	29	24	29	25	28	19	11	24
28	30	28	29	24	22	26	27	26	27	25	30	28	30	25	29	29	29	28	27	32	33	29	25	26	31	32	25	28	26	34	32	29	29	30	26	29	29	26	25	29	25	25	22	27	23	26	17	9	22
24	27	24	24	21	25	18	20	18	23	20	24	25	29	23	28	28	28	26	28	31	27	28	22	25	28	29	26	25	24	28	27	29	24	29	25	32	27	28	24	26	20	20	26	24	22	20	25	19	24
28	33	28	29	27	31	24	25	24	26	24	31	28	35	23	34	34	34	30	33	35	32	34	25	29	33	32	29	31	28	33	32	34	26	31	28	34	30	29	27	30	27	29	27	28	26	24	27	23	28
29	28	29	26	21	25	23	23	23	24	23	30	29	30	23	29	29	29	29	25	32	29	29	25	28	31	31	24	30	31	32	32	28	24	30	27	34	29	32	23	25	20	23	26	21	23	25	24	20	28
28	31	28	26	24	24	23	23	23	26	25	25	26	32	28	28	28	28	28	29	29	30	28	24	26	27	31	33	30	30	30	28	29	26	32	29	34	26	31	26	30	28	28	27	26	28	26	23	22	24
30	34	30	28	26	30	25	26	25	31	25	32	28	35	26	33	33	33	31	32	33	35	33	22	29	33	35	32	32	27	36	35	33	23	33	30	34	31	31	27	33	27	27	30	24	29	26	23	21	26
30	32	30	28	26	27	23	25	23	29	26	28	27	34	29	31	31	31	31	32	32	33	31	26	27	30	34	33	32	31	33	31	32	28	34	30	35	28	33	27	31	24	26	27	23	30	26	28	26	27
25	31	25	26	25	28	22	24	22	29	25	29	27	32	26	31	31	31	28	31	32	32	31	23	27	30	32	29	29	26	32	32	30	26	29	25	31	29	29	24	31	27	28	26	28	28	22	28	24	25
26	31	26	25	24	28	23	22	23	26	22	26	24	28	24	27	27	27	25	28	28	28	27	23	24	26	28	31	28	27	28	25	27	25	30	27	31	25	30	22	27	25	26	24	27	25	24	22	22	23
28	31	28	29	28	29	26	27	26	31	27	27	28	33	27	30	30	30	32	32	31	32	30	21	27	30	34	32	29	25	33	30	31	26	32	30	34	28	29	28	31	28	27	29	25	26	23	22	20	27
25	30	25	25	24	28	20	22	20	27	24	28	26	31	26	30	30	30	27	30	32	29	30	18	26	30	30	30	28	30	30	32	29	19	29	26	33	29	32	26	27	25	28	23	20	28	25	30	25	28
29	31	29	28	27	27	24	24	24	29	25	24	25	32	29	29	29	29	28	30	29	30	29	26	25	27	32	34	30	29	29	26	29	29	33	29	35	25	31	28	30	28	27	29	29	25	25	20	20	22
26	30	26	25	24	28	19	20	19	26	21	26	25	31	27	29	29	29	25	30	33	31	29	24	25	27	30	29	31	27	30	31	32	26	31	26	34	25	30	26	29	26	26	28	26	24	22	23	21	21
27	30	27	22	21	25	22	24	22	27	26	28	27	26	27	28	28	28	27	28	33	33	28	24	27	30	33	29	31	32	33	34	30	27	32	30	31	28	30	25	29	29	26	25	25	29	28	23	21	29
30	30	30	28	24	22	24	25	24	25	26	30	28	30	29	29	29	29	31	29	33	33	29	26	27	31	32	25	32	29	32	33	31	30	32	30	34	26	32	27	26	26	29	28	30	24	24	21	19	26
28	30	28	25	25	28	20	22	20	27	21	28	26	31	27	31	31	31	28	30	31	28	31	25	25	30	32	31	28	28	30	29	28	23	31	27	33	28	33	25	28	24	24	27	30	26	24	25	23	25
24	27	24	25	21	22	21	23	21	22	24	26	26	27	25	26	26	26	26	26	30	30	26	20	25	28	29	24	29	27	29	30	28	27	28	26	31	25	28	24	25	26	26	25	28	23	23	21	17	23
26	28	26	20	20	24	20	22	20	26	23	26	25	24	26	27	27	27	26	27	31	31	27	22	25	29	32	28	29	29	31	31	28	26	31	29	30	26	30	24	27	27	22	25	26	26	25	20	17	26
33	33	33	25	23	27	26	27	26	30	27	33	28	30	27	32	32	32	29	29	34	36	32	29	29	34	36	31	35	34	37	36	32	28	36	33	33	32	36	26	32	28	26	31	29	31	31	24	22	29
31	29	31	22	22	27	23	24	23	26	24	30	28	26	28	30	30	30	29	29	34	32	30	28	28	32	33	29	32	31	33	33	31	28	33	30	32	29	34	26	29	28	24	30	31	24	28	22	20	26
30	31	30	27	22	25	24	25	24	27	25	30	28	30	28	29	29	29	29	29	34	34	29	26	29	31	33	29	32	32	34	35	32	27	33	31	34	30	34	25	30	28	30	28	29	28	29	24	21	28
35	35	35	26	24	30	27	28	27	31	27	35	30	30	30	34	34	34	31	32	37	38	34	32	32	36	37	33	37	37	38	39	36	30	37	36	36	35	39	27	34	30	28	31	31	33	35	28	25	31
28	27	28	24	20	23	21	22	21	26	24	29	25	28	26	28	28	28	26	26	31	30	28	24	25	30	31	26	30	32	30	31	27	25	30	28	35	27	33	24	25	27	30	24	24	26	29	25	22	29
31	31	31	29	22	24	24	26	24	27	27	28	28	32	28	29	29	29	28	27	32	34	29	29	28	31	34	29	33	34	35	33	32	29	34	33	36	32	34	25	31	29	29	23	26	31	33	27	22	30
30	35	30	32	31	33	28	29	28	33	29	32	30	35	30	34	34	34	32	34	35	36	34	29	30	33	35	35	35	32	36	35	35	32	35	33	37	32	35	30	34	26	27	29	27	31	28	30	28	30
32	34	32	31	30	32	27	28	27	28	29	33	31	36	29	35	35	35	33	31	36	35	35	28	31	34	34	32	36	34	31	32	32	31	34	32	38	30	30	30	33	32	34	32	34	32	31	31	30	31
33	29	33	31	31	32	32	33	32	28	35	34	32	29	32	33	33	29	33	24	36	32	33	31	31	35	31	27	32	33	27	36	30	37	31	34	31	32	32	32	27	33	32	34	37	33	36	31	30	35
30	28	30	25	21	26	22	22	22	25	25	30	27	29	26	29	29	29	27	24	33	31	29	27	27	31	31	26	31	32	28	32	26	27	32	30	36	29	30	25	28	29	31	29	29	29	30	27	24	30
33	37	33	29	33	35	30	31	30	36	34	35	31	32	29	35	37	35	32	35	34	36	35	27	30	35	38	37	37	38	39	36	36	28	36	36	36	33	39	32	34	28	26	33	24	37	37	35	34	37
32	31	32	32	26	30	29	30	29	33	31	33	28	33	25	31	31	31	27	24	33	34	31	30	28	33	34	28	34	34	31	35	26	30	33	31	37	32	31	27	30	28	31	30	28	31	34	27	26	33
26	24	26	25	21	25	22	22	22	26	24	26	22	25	22	25	25	25	24	18	28	25	25	23	23	27	28	23	25	29	22	27	19	24	27	24	31	24	26	23	20	24	28	26	25	27	30	24	22	30
29	30	29	31	26	29	27	28	27	31	30	31	28	31	27	30	30	30	29	23	34	31	30	27	29	32	33	28	31	34	28	34	25	29	32	29	36	30	32	28	26	24	28	30	26	31	33	28	26	34
29	29	29	30	26	27	27	26	27	25	29	28	27	28	26	27	27	27	28	22	30	28	27	26	28	29	28	25	28	31	23	29	23	29	30	28	32	25	28	28	23	25	28	30	28	27	31	29	27	31
28	31	28	32	26	26	29	30	29	30	31	31	29	31	26	30	30	30	28	27	33	34	30	27	26	32	33	28	31	31	35	34	31	31	32	31	34	30	31	27	30	28	29	21	27	27	31	23	17	29
[truncated: 79 more columns]

## Sheet: PCoA (2)
Principal Coordinates Analysis (PCoA)		4	41	4	50	33
PCoA via Covariance matrix with data standardization			Pop1	Pop2	Pop3	Pop4
Data Sheet	GD (2)
Data Title	Raw Data Check Statistics
No. Samples	128	No. Pops.	4
Percentage of variation explained by the first 3 axes
Axis	1	2	3
%	11.9704	8.76101	4.88167
Cum %	11.9704	20.7314	25.613
Eigen Values by Axis and Sample Eigen Vectors
Axis No.	1	2	3	4	5	6	7	8	9	10	11	12	13	14	15	16	17	18	19	20	21	22	23	24	25	26	27	28	29	30	31	32	33	34	35	36	37	38	39	40	41	42	43	44	45	46	47	48	49
EigenValue	16.9927	12.4368	6.92984	6.14946	4.97248	4.60241	4.19987	4.06107	3.63023	3.52772	3.36441	3.27723	3.01361	2.66614	2.58398	2.47752	2.31387	2.20185	2.13327	2.08435	1.91226	1.83677	1.71464	1.67492	1.57927	1.52182	1.49643	1.48718	1.40208	1.33747	1.29484	1.24687	1.22758	1.15832	1.0742	1.06302	1.04001	0.998597	0.928454	0.916444	0.899499	0.853733	0.813476	0.780059	0.74945	0.69151	0.668038	0.662157	0.651889
1	0.388052	-0.164535	-0.256188	0.106673	0.0389309	-0.135103	-0.243865	-0.321602	-0.147679	0.332087	-0.218483	0.162235	0.211073	0.228463	0.12481	-0.161615	-0.106497	-0.0733623	0.21102	-0.119451	0.0916612	-0.225061	0.0564258	0.091362	-0.0497436	-0.0672795	0.220551	0.132728	-0.045529	-0.166691	0.0232077	0.0596083	-0.153911	0.0845931	0.00935785	-0.0204442	0.00562518	-0.0329834	0.0704103	-0.0399582	-0.0256805	-0.0879148	-0.00449499	0.0781801	-0.000978566	-0.0150182	-0.0122613	-0.0564258	0.0394241
2	0.456374	-0.00717472	0.351674	-0.354439	-0.0558612	-0.103548	0.122975	0.26201	-0.0154533	-0.107802	-0.00371028	0.142431	-0.216867	0.00317499	-0.0602128	-0.0126518	-0.0851513	0.00833429	-0.127012	-0.0595916	0.252592	-0.154843	0.133926	0.0526401	-0.148467	-0.240998	0.0397612	0.249044	0.0180795	0.222364	-0.160855	0.226541	-0.0794849	-0.179819	-0.0573822	-0.0657577	-0.11589	-0.0324292	-0.156954	0.215557	0.133203	-0.134974	0.0755566	-0.0527899	-0.0311466	0.0181939	-0.0221636	0.171087	-0.0828143
3	0.408557	-0.167321	-0.261478	0.115357	0.046746	-0.0853411	-0.226642	-0.308285	-0.162226	0.318333	-0.238025	0.175545	0.211122	0.231615	0.108642	-0.130429	-0.133289	-0.064674	0.231105	-0.134869	0.0996433	-0.199629	0.00232885	0.0499927	-0.0982433	-0.0510712	0.222177	0.0880033	-0.0629583	-0.177912	0.0288165	0.0612796	-0.111396	0.10473	0.0363778	0.0131854	-0.0337002	-0.0543236	0.021317	-0.0532314	-0.0729894	-0.105043	0.0118324	0.0319439	0.000486729	-0.0303752	0.0376122	-0.00637179	0.041049
4	0.495114	0.0430159	-0.35744	0.423475	-0.0866918	-0.171597	0.0826158	0.120719	-0.083463	0.00160675	-0.199992	-0.0588033	-0.157164	-0.103941	0.0575892	0.155738	-0.149594	-0.114229	0.0982807	-0.0103464	-0.0880524	0.105694	-0.134337	-0.11178	-0.153172	0.24468	0.0100537	-0.121402	0.049214	0.177788	0.00707362	-0.0108774	-0.0430852	-0.0162639	0.0156115	-0.0163515	-0.108216	-0.0225418	-0.0698127	0.0117952	0.0611432	0.0705968	0.0608137	-0.0883928	-0.0231075	-0.0863595	0.00918416	-0.0132553	-0.007385
5	0.241751	0.205589	-0.0516404	0.40094	0.0522879	-0.174428	0.279771	0.325616	0.15437	-0.0955854	-0.0445068	0.0130437	-0.0999178	0.0630353	-0.176177	0.0925628	-0.0700153	0.280463	-0.126542	-0.0931702	0.135358	-0.240382	-0.0526312	-0.0880295	-0.0489943	0.00580726	0.0879909	0.169032	-0.0114238	0.0856596	0.0364998	0.144593	-0.10699	0.0216523	0.0528311	-0.0698651	0.00214171	-0.0750614	-0.0131882	0.0113767	0.0166644	-0.0296934	0.0713288	0.153293	0.103039	-0.128518	0.0382041	-0.0795788	-0.0132314
6	0.206816	-0.190126	0.0113104	0.326031	-0.0575124	-0.0141172	-0.199403	0.263978	-0.22397	0.102324	-0.109158	-0.0419689	0.217936	-0.191526	-0.0232586	-0.144641	0.0669279	0.2651	-0.250311	-0.114163	0.0262497	-0.241151	-0.054817	0.0929907	0.0204805	0.09145	-0.128709	-0.107715	0.202147	-0.0474301	-0.0419033	0.11539	-0.0234733	-0.130211	0.147521	0.201892	-0.0589255	-0.110148	-0.0181504	0.0297189	-0.0392877	-0.0721208	-0.0208973	0.126294	-0.108854	-0.084547	-0.0546055	-0.069229	0.0374251
7	0.319909	0.0959132	-0.444724	0.224771	-0.013996	-0.442575	0.230071	0.00824987	0.0492541	0.0565178	-0.00145276	-0.0415647	0.0911188	0.289286	0.0185495	-0.0248331	0.151243	-0.133727	-0.00399901	0.0385768	0.0268891	-0.0305467	0.0164281	0.0566974	0.0593321	-0.0834313	-0.0571762	0.0121233	-0.100127	0.00979759	-0.0799731	0.0216327	0.0825254	-0.0112028	-0.0470604	0.0369362	-0.00264101	-0.0795364	0.0531458	0.00607326	-0.061801	-0.0290166	0.0143905	-0.0957513	-0.0557843	0.0209878	-0.0212816	0.0305858	-0.0437807
8	0.464032	0.0528978	-0.420517	0.29691	-0.0381939	-0.385584	0.171224	0.111523	-0.0154638	0.0369133	-0.0187727	-0.0429693	0.0806233	0.0266924	-0.135747	-0.0320131	0.00403633	-0.0179105	0.102427	0.04513	-0.0648091	-0.0290005	-0.0552663	-0.0329807	-0.0278001	0.035719	-0.0232462	-0.0558103	-0.109562	0.112566	0.00196965	0.00467922	-0.0772087	0.0113072	-0.0659282	0.0677702	-0.0460066	-0.0133596	0.0782776	-0.0744074	-0.0573769	0.00128316	0.0701279	-0.0139518	-0.10665	-0.058491	0.0337623	-0.0244701	0.0372421
9	0.319909	0.0959132	-0.444724	0.224771	-0.013996	-0.442575	0.230071	0.00824987	0.0492541	0.0565178	-0.00145276	-0.0415647	0.0911188	0.289286	0.0185495	-0.0248331	0.151243	-0.133727	-0.00399901	0.0385768	0.0268891	-0.0305467	0.0164281	0.0566974	0.0593321	-0.0834313	-0.0571762	0.0121233	-0.100127	0.00979759	-0.0799731	0.0216327	0.0825254	-0.0112028	-0.0470604	0.0369362	-0.00264101	-0.0795364	0.0531458	0.00607326	-0.061801	-0.0290166	0.0143905	-0.0957513	-0.0557843	0.0209878	-0.0212816	0.0305858	-0.0437807
10	0.449624	-0.0611939	0.0260914	-0.0091117	0.0818547	-0.3243	0.135423	0.345021	-0.328608	-0.16848	-0.0252426	0.0818698	0.073201	-0.241971	0.00274217	-0.172519	0.0335086	0.0687571	0.0704737	0.156198	-0.0292522	-1.92589e-05	-0.0624967	0.025095	0.224009	0.167752	-0.165571	0.0519886	-0.0268689	0.0209688	-0.127751	0.0106443	0.00614621	0.0594839	0.0145726	-0.161094	-0.0845124	-0.102605	-0.00716233	-0.0977678	0.0205624	-0.186932	-0.125266	-0.0285187	-0.0132934	0.0403997	-0.00627512	-0.0664733	0.0044789
11	0.264688	0.149462	-0.368502	0.18256	0.177479	-0.220054	0.448596	0.120494	0.176668	-0.216662	0.011417	-0.200707	0.0028806	0.216436	-0.121255	0.034922	-0.00821108	-0.104699	0.0330733	0.0105586	-0.00939733	0.0609146	-0.00187275	-0.0410283	0.0156705	-0.0408055	0.0923844	-0.137092	0.0397567	0.175216	0.0965307	0.0253908	-0.016949	-0.0365456	-0.128959	0.0404209	0.280747	-0.0709945	0.017746	-0.145342	-0.0878856	-0.0513075	-0.0480484	-0.0734573	-0.0331202	0.135788	-0.0805103	-0.0306253	0.0634024
12	0.527812	-0.129856	-0.228902	0.128686	-0.136194	0.253359	0.0969617	-0.152636	0.156059	-0.000586232	0.258206	0.0157737	-0.0597602	0.214222	0.0624915	-0.171232	0.233169	-0.0722036	-0.184433	0.165489	-0.127166	-0.0621209	0.114555	0.020423	0.0639699	-0.142248	-0.109392	0.20149	-0.0823628	-0.0253111	-0.0810155	0.192829	0.0237665	0.0252092	0.141083	0.0689251	0.088922	-0.127659	-0.162596	0.000382995	-0.0364083	0.0123863	-0.0057104	0.0392823	-0.0126911	0.0594047	0.155625	0.00423673	-0.0151521
13	0.448393	0.14629	-0.170517	0.216981	0.116191	-0.247524	0.248895	-0.055872	0.179432	-0.0400232	0.101677	-0.138154	-0.186238	0.186111	-0.129618	0.27682	-0.211238	0.0987054	-0.0499368	0.164864	-0.00580212	-0.231487	0.0816796	-0.0925614	0.155113	-0.0919043	-0.0754707	0.0533256	-0.0596648	0.00139689	-0.0908994	-0.18897	-0.0816551	0.0199471	0.145932	0.00498535	-0.0158445	0.172414	-0.117291	0.0924799	-0.16392	0.0698125	-0.018761	-0.0825539	-0.0440448	-0.0387674	-0.0888505	-0.0158237	0.0484419
14	0.581062	-0.153421	-0.0871152	0.475816	-0.205241	-0.0622263	0.104263	-0.0666101	-0.0674705	0.104057	-0.156965	-0.0200767	-0.170648	-0.0457306	0.0762499	0.108462	-0.300119	-0.112063	0.122914	0.0161563	-0.152373	-0.0197813	-0.0318781	-0.124336	-0.0429296	0.257182	-0.00405931	0.00770501	-0.0217777	0.0519525	-0.0473682	-0.171951	0.0012376	-0.104972	0.146751	-0.0117392	-0.0942175	0.0695575	-0.0471402	0.120166	0.0101019	0.0747459	0.0487935	-0.0583761	-0.060497	0.0385044	0.0276382	-0.0157299	0.0238334
15	0.456959	0.0880052	-0.00182605	0.252665	0.395718	0.171518	-0.0703076	-0.0671076	0.134967	-0.0615943	-0.254388	-0.00398806	0.300898	-0.0552907	-0.0824795	-0.236664	0.0435508	0.151593	0.197172	-0.0339801	0.055741	0.0750299	0.221308	0.0321026	0.0793668	0.0468059	0.0874478	0.0417687	-0.0615593	0.035183	0.111339	-0.133281	-0.153254	0.0382599	-0.0374493	0.0547853	0.051498	-0.011043	0.0446964	-0.0114829	-0.0727144	0.0237623	0.135646	-0.0109047	0.11633	0.00564275	-0.111665	0.013229	0.0452324
16	0.658152	-0.268307	-0.0815969	0.463472	-0.01733	0.520063	-0.0603988	-0.0517805	0.0214224	-0.0452103	0.0214128	0.0870978	0.0578747	-0.107997	-0.0401382	-0.0789278	0.1062	-0.00308649	-0.0120684	0.025121	-0.0869485	0.107124	0.00549997	-0.0327951	-0.0243417	0.0110942	0.0282	-0.0304459	0.0125883	-0.0225859	0.0477387	0.0206932	0.0118244	0.00213758	-0.00985209	-0.0378439	-0.0216863	-0.0190226	0.0539153	0.013713	0.00973844	0.00863364	-0.00170054	0.0110618	0.0119054	0.00720234	0.0101422	0.00959666	0.0162791
17	0.571287	-0.223448	-0.0218143	0.374583	-0.0209912	0.602814	0.0971491	-0.0377954	0.139088	-0.158885	0.0929411	0.150906	-0.0897472	0.0839426	-0.0589296	-0.00792151	0.111298	0.0670306	-0.0941731	-0.00247594	-0.0503074	-0.0139738	0.0174375	-0.0305166	-0.0689921	-0.039607	0.0358643	0.0304977	0.0531855	0.0158517	0.0413367	0.119813	-0.0469025	0.0414478	0.0777796	-0.0977831	0.0570729	-0.0182073	-0.0732873	0.116678	0.00603736	-0.0292837	0.0253884	0.0150038	0.0267143	-0.029388	0.000119015	-0.0157089	0.0250641
18	0.677661	-0.165986	0.0962468	0.328041	0.243257	0.484868	-0.00781096	0.0790793	-0.00797302	-0.161197	-0.00367464	0.0544542	0.0422271	-0.175853	0.0172063	-0.0769926	0.124536	-0.0711754	0.0398657	0.160772	0.0284263	0.0325759	-0.11137	0.0596835	0.0408619	-0.000332355	0.0174891	0.023194	0.0418672	0.0753399	-0.0540739	0.00460877	0.0236139	-0.055092	-0.0545633	-0.047212	-0.0891204	0.0442824	0.0355001	-0.0616488	0.00150803	0.0128219	-0.0161485	-0.0192438	0.0808786	-0.0100953	0.0368426	0.0288123	0.032813
19	0.394083	0.0993902	-0.0394	0.255837	0.225664	0.0603648	0.113274	-0.110169	0.157638	-0.0833495	0.0400549	-0.140486	-0.0799696	0.227211	0.0922776	0.24769	-0.00837643	0.285836	-0.00348174	0.104769	0.107971	-0.0937047	0.0285468	0.130726	0.273179	0.0480794	-0.0740266	-0.0176805	-0.033106	-0.418836	-0.0646407	-0.248506	0.305372	0.0441709	-0.0016391	-0.0447316	-0.0917233	0.115063	0.0370197	0.242674	0.126692	-0.114483	-0.107397	0.120771	-0.0162264	-0.0531218	-0.0445235	0.0552576	-0.0609921
20	0.301705	0.0199173	0.477877	-0.0371567	-0.0206475	-0.118576	0.14795	0.0312618	0.0246431	-0.0215385	0.0624614	0.0698944	-0.0931671	0.199469	-0.147921	-0.0983228	0.0216435	0.144156	0.25897	0.104063	0.16729	-0.302919	-0.0498493	0.221689	0.0564377	0.136402	-0.277307	0.105734	-0.0601092	-0.0546374	0.187709	-0.100003	-0.152612	-0.291099	0.00857934	0.0437204	-0.157832	-0.0502271	0.0681017	-0.0399064	-0.0525124	0.243975	0.0200594	0.00336267	0.0671055	0.152137	0.14798	0.0597328	0.0796306
21	0.672084	-0.23565	-0.0591858	-0.130836	-0.292542	-0.0757594	-0.278167	-0.0255578	-0.179763	0.080521	0.0748009	-0.160688	-0.287604	-0.137735	-0.00176468	-0.0685602	-0.116225	0.206131	-0.0627745	-0.175096	-0.0375664	-0.0170459	0.0639887	0.0611319	0.128301	-0.0483658	0.0302668	-0.0265511	0.0328164	-0.00291659	-0.00261249	-0.0875995	-0.0645475	0.0736055	-0.00496611	0.102236	-0.00260452	-0.0334926	0.109836	-0.0249779	0.0826012	0.1355	-0.113694	-0.0630302	-0.151169	0.0847098	-0.00896374	-0.023443	0.00477022
22	0.766263	-0.0381668	0.187828	-0.418744	0.0103658	-0.340323	0.0444323	0.212699	-0.122464	0.0154866	0.11646	-0.139211	-0.044764	-0.211728	0.0571551	-0.230714	-0.059298	-0.0873504	0.0421476	0.0797651	-0.0779412	0.0584359	-0.0652147	0.0660304	-0.0615792	-0.0320501	0.00831387	0.0770788	-0.0638254	-0.0511649	-0.0422535	0.0179382	0.0389085	0.0383322	-0.0487539	-0.0477637	-0.135147	-0.0855204	0.0693813	-0.0739897	0.0498765	-0.0698017	-0.0728807	0.0271879	0.0489532	-0.00650295	0.0388164	0.040614	-0.0161896
23	0.658152	-0.268307	-0.0815969	0.463472	-0.01733	0.520063	-0.0603988	-0.0517805	0.0214224	-0.0452103	0.0214128	0.0870978	0.0578747	-0.107997	-0.0401382	-0.0789278	0.1062	-0.00308649	-0.0120684	0.025121	-0.0869485	0.107124	0.00549997	-0.0327951	-0.0243417	0.0110942	0.0282	-0.0304459	0.0125883	-0.0225859	0.0477387	0.0206932	0.0118244	0.00213758	-0.00985209	-0.0378439	-0.0216863	-0.0190226	0.0539153	0.013713	0.00973844	0.00863364	-0.00170054	0.0110618	0.0119054	0.00720234	0.0101422	0.00959666	0.0162791
24	0.257342	0.0837617	-0.142202	-0.143805	0.169667	-0.10663	-0.22408	-0.0424538	-0.0473996	0.27764	-0.151201	0.0865054	0.029127	0.0297554	-0.00812211	-0.112655	0.0154306	0.00113941	0.0734592	-0.101255	0.178173	-0.108167	-0.171795	-0.0941505	0.146944	-0.281873	-0.0735025	-0.212067	0.0407519	0.131981	0.123504	0.107836	0.209897	-0.189142	0.280298	0.0999655	0.224193	0.125759	-0.0439197	0.230368	0.100233	-0.0246509	0.0272665	0.119703	0.0504297	-0.000566688	-0.0759872	0.0158565	0.0564083
25	0.505901	-0.0830252	-0.111527	0.141481	0.0124917	-0.0706216	-0.139264	-0.00910824	-0.0672774	0.0835125	0.0653505	-0.198331	0.0339414	-0.0579588	0.000771564	0.124827	-0.262835	-0.0690139	-0.152979	-0.167878	0.0919284	0.103842	0.157215	-0.0930953	-0.0552273	-0.0513278	0.0400068	-0.0684925	0.244403	-0.0250229	-0.147663	0.129426	0.180562	-0.0583993	0.00510102	0.187464	0.0190699	0.0552714	0.0913776	-0.157272	-0.104515	-0.0103962	0.0523448	-0.137011	0.097164	0.0869181	-0.0558372	0.1599	-0.0690512
26	0.710709	-0.25204	-0.231153	0.369661	-0.00666349	0.508284	-0.0954598	-0.104717	0.0249026	-0.0892039	0.0894643	0.0427311	0.0820218	-0.0802551	-0.0493513	-0.00677001	0.12399	-0.0489154	0.0148677	0.0542035	-0.097357	0.113749	0.0281252	-0.0333314	-0.016143	-0.00937424	0.0150549	-0.0575702	0.0158456	-0.0313312	-0.00369632	0.0334671	0.0198225	-0.00259658	-0.0328714	-0.00737425	-0.0279366	-0.00331008	-0.00257653	0.00278847	-0.000598464	0.0320068	0.0268596	0.00696452	-0.00100644	0.0153753	0.0322375	0.0216297	0.0336223
27	0.68369	-0.0905435	0.232605	-0.279399	0.178526	0.219352	0.0869223	0.103246	-0.0597673	-0.312451	0.095998	0.110673	-0.198073	0.0567401	0.104275	0.114679	-0.0758628	0.0544316	-0.0130765	-0.0853471	0.180228	0.0232426	-0.115309	0.104153	0.0726214	-0.00759839	0.0111741	-0.101134	0.023409	-0.0782455	-0.11262	0.0689833	0.0838274	0.17412	-0.0405444	-0.295421	0.0738933	0.0621554	-0.0111709	-0.0388531	-0.0518781	0.124387	-0.0485286	-0.0281302	-0.141654	-0.088878	0.0802783	-0.000598461	0.137659
28	0.317689	-0.0101847	0.536954	-0.287775	0.164933	0.0760858	0.109696	0.215252	-0.0238089	-0.166909	-0.113118	0.252853	0.0670565	0.0236523	0.0315595	-0.0421801	0.0172194	0.0233683	-0.0411146	-0.330254	0.27515	0.03345	0.205109	0.0499469	0.102521	-0.0324527	0.120706	0.0939449	-0.0832789	-0.00970533	-0.18496	-0.00417239	-0.0864938	0.0482396	0.0633608	-0.0767147	0.0229684	0.0366812	0.0167456	0.0760628	0.00594817	0.0806796	0.203135	-0.16012	0.0599069	0.171915	0.0020179	-0.160129	0.0306142
29	0.623424	-0.0136676	0.210553	-0.476126	0.214983	-0.0422207	0.0524493	0.199784	0.0788435	-0.0386815	-0.0343127	-0.111516	-0.0389919	0.242144	0.146835	-0.248312	-0.00282252	-0.115851	-0.0783833	-0.0627197	-0.0958138	-0.105498	-0.17088	0.0668971	-0.204192	-0.0664492	-0.0326225	-0.0801715	0.0287679	-0.0125442	-0.126702	0.0255128	-0.042629	0.108493	-0.160945	0.0355417	0.138468	0.071334	0.0514862	-0.112379	0.0202014	-0.00106196	-0.066587	0.0957284	0.00702298	-0.0427893	0.0685793	-0.0237652	-0.0817857
30	0.287498	-0.0823794	0.0331463	-0.347286	0.386517	0.571138	0.0178627	-0.0752544	-0.0307835	-0.167781	-0.285922	0.0300068	-0.0344462	0.0981459	0.0201433	-0.152482	0.243077	0.0654304	0.117469	0.0692389	0.110436	0.000384834	-0.0438533	-0.00394851	-0.122044	-0.0786554	-0.0756282	0.0319938	0.0533474	0.152164	-0.064546	-0.216217	0.100437	-0.173469	-0.0359488	0.202708	-0.105256	0.169385	-0.0130287	-0.129241	0.0352488	-0.127088	-0.0587616	-0.0290149	-0.219984	-0.00708854	-0.194337	-0.0436007	-0.0604284
31	0.747384	0.0712174	0.31393	-0.45281	-0.0249648	-0.0933123	0.121809	0.180323	-0.151829	-0.00819834	0.298908	-0.114335	-0.0450039	0.190329	0.00499492	0.152285	0.0219664	-0.107686	-0.090988	0.10362	-0.0779775	-0.000196526	-0.140635	-0.0432714	-0.00993828	0.0121857	0.0504149	-0.0674462	0.0455493	-0.0292326	-0.00497245	0.0496202	0.065582	0.0758462	0.0779642	-0.0726306	-0.01183	0.1147	0.0255743	-0.107306	-0.0523054	0.020859	0.00472387	0.106737	0.16419	0.0773268	-0.105904	-0.111732	0.0107715
32	0.655675	-0.189105	-0.088305	-0.206468	-0.354259	-0.0721075	-0.176187	0.0113046	-0.149162	0.149212	0.186316	-0.166184	0.0562071	-0.196036	0.000654822	-0.116123	-0.163215	0.108362	-0.175431	0.0197631	-0.225534	-0.00855172	0.26299	0.086021	0.076045	-0.00554633	-0.0665484	-0.00948943	-0.00138019	0.0577613	0.0644942	0.0346919	0.120154	0.13338	0.0645704	0.097547	-0.0680161	0.0803068	-0.110155	-0.0564848	0.00508025	-0.0924817	0.0534001	0.0806341	0.00462377	0.00303771	0.0710696	-0.0886201	-0.0714664
33	0.512504	-0.0890141	0.308935	-0.346102	-0.388342	-0.0968189	-0.0490878	0.0277821	0.00566586	0.187141	0.197055	-0.114196	-0.108043	0.122606	-0.0716721	0.110167	-0.0102729	0.140492	-0.0790996	-0.0843935	-0.246931	0.0235617	-0.036946	0.0629114	-0.182872	0.0925915	0.0167267	-0.0654815	-0.0476478	-0.117783	0.30242	-0.0114428	-0.0574188	0.0842141	0.110388	0.073041	-0.0430322	-0.00575161	0.148167	0.0855097	0.0420203	0.0472419	0.00570434	0.0587367	0.122932	-0.026297	-0.112407	7.74699e-05	-0.0151749
34	0.438105	0.213435	-0.219241	0.0396025	0.215394	-0.368165	-0.0180418	0.172281	0.168299	0.00999847	-0.0881262	-0.24166	0.0876284	-0.191932	-0.0543001	-0.156094	0.243636	0.0906261	0.0863525	-0.0829202	0.0858039	0.196273	-0.12925	0.00117324	-0.0206414	-0.0986453	-0.119679	-0.198951	-0.0693417	-0.0859102	0.219773	-0.0337549	0.0631792	-0.129577	-0.00975984	-0.240961	0.0337957	-0.198749	0.0101618	0.0557316	0.095641	-0.0162506	-0.0686277	-0.0709648	0.0592903	-0.0473422	0.0807454	-0.0181343	-0.100658
35	0.56722	-0.0744191	0.149619	-0.342782	0.0717666	-0.189619	-0.182525	0.0702457	-0.101252	0.0318124	-0.148018	0.0870529	0.0187667	-0.234023	-0.0466049	0.185049	-0.16089	-0.148502	0.0630035	-0.0467312	-0.0274889	0.24393	0.0558444	-0.276647	-0.124474	-0.0670523	0.217461	0.170112	-0.0981852	-0.206908	0.0384767	0.0186359	0.046803	-0.0546021	0.0523439	-0.110286	-0.150197	-0.207094	0.0168701	0.131438	-0.0717951	0.0128671	-0.152847	-0.0457883	-0.174036	-0.0504213	-0.124332	0.0733577	0.215055
36	0.407564	-0.00948014	0.0662626	-0.37158	0.073692	-0.0611831	0.153607	0.034515	0.202401	-0.0852794	-0.0601659	0.0747534	0.12392	-0.1185	-0.0421933	0.0620943	0.219089	0.0632667	0.0869341	0.266426	-0.315766	0.112121	-0.0260732	-0.17794	-0.261091	-0.0336218	-0.0945248	0.206837	-0.168164	-0.161231	-0.115296	0.00687931	-0.0586943	0.0755595	-0.0667233	0.204518	0.331666	-0.0843532	-0.0898695	0.21993	0.0303075	0.211788	-0.0427043	-0.0148063	-0.0666801	0.0178691	-0.0608588	-0.103093	-0.0141283
37	0.497253	-0.0855272	0.280515	-0.403686	0.13881	0.151741	-0.0989906	0.109054	0.141795	-0.152656	-0.35225	-0.185112	0.00866899	0.0693631	0.48145	0.120258	0.0126355	-0.166668	0.0875207	-0.114674	-0.00157843	-0.293721	-0.132429	0.217899	-0.151676	0.197347	-0.0574262	-0.27344	0.0770778	-0.0699402	0.00768972	-0.0925313	-0.0327533	0.0983331	0.0180307	0.0458187	0.0430977	-0.0378393	-0.0488146	-0.0434968	-0.047587	0.0105895	0.0839945	-0.0354991	-0.0291856	-0.05742	-0.0215719	-0.0173201	-0.0868515
38	0.60263	-0.140519	-0.0106995	-0.19759	-0.113399	-0.0154882	-0.205158	0.087824	-0.182035	0.122434	0.158417	-0.0722752	-0.0135895	-0.086285	-0.0260161	0.114653	-0.130095	-0.165685	-0.210824	-0.0477465	0.0376186	0.109594	0.165297	-0.153438	0.182727	-0.124443	0.0724708	-0.204183	-0.100627	0.0526937	0.0309898	-0.136678	0.0335772	0.0115027	-0.100847	0.00717788	0.0597047	0.0840368	0.112416	0.0444956	-0.00112833	-0.00197808	0.179353	0.00932582	0.0601905	0.0607734	0.0279014	0.0211812	-0.00701632
39	0.380009	-0.0117149	0.197454	-0.400068	0.202412	0.228314	-0.230733	0.0604353	0.0773878	-0.0435341	0.0063825	0.104074	0.0752859	0.387556	-0.100617	0.285713	-0.0857523	-0.233174	0.0113807	-0.218978	0.0721341	0.142243	0.275348	-0.09756	0.172995	0.0896638	-0.0982443	-0.174699	-0.0979124	0.0261529	0.365577	0.102669	0.00760362	-0.205514	-0.21789	0.130909	-0.0795854	-0.155971	-0.0378833	0.0568167	-0.0762902	0.029989	-0.0376023	0.0586583	-0.0990877	-0.0413297	0.142396	0.0392798	-0.107708
40	0.368856	0.0958875	-0.06383	0.27118	0.123533	0.0585284	0.118755	0.133599	0.206351	-0.217681	-0.0234849	-0.0849215	-0.123083	-0.020818	-0.11528	0.26004	-0.259551	0.170471	-0.134696	-0.218581	0.155493	-0.0618608	-0.0785715	-0.100652	-0.0921838	0.00964746	0.12992	0.0708469	0.245623	0.157863	0.158697	0.041095	-0.0728057	0.152468	0.00968946	0.0256425	0.131878	-0.0345574	-0.134519	-0.122646	0.119587	-0.00991947	-0.13492	-0.0245635	0.08977	-0.0429168	-0.0245209	0.0251836	-0.0472913
41	0.574999	-0.0337537	0.282929	-0.142672	0.06291	-0.130865	0.0745411	0.0420285	-0.057246	0.0976859	0.0259015	0.0432091	0.167432	-0.27746	0.097213	-0.294742	0.196385	-0.040818	0.0752795	0.21731	-0.0645159	0.110076	-0.061262	-0.0545806	0.0450607	-0.0395269	0.0673025	0.0630121	-0.109228	0.116574	0.00739644	-0.202008	-0.0969845	-0.102159	0.0960195	0.136306	0.0128288	0.144425	-0.0714661	-0.0634639	-0.0133719	-0.00878881	0.080503	0.0227463	0.203965	-0.0113297	0.00491425	0.159854	-0.0515535
42	0.022263	0.0511245	0.0388375	-0.129763	0.157641	-0.260698	0.168859	-0.462811	0.178589	-0.111834	0.0187822	-0.111609	-0.185601	-0.256462	-0.141601	-0.0401508	0.0428458	-0.0771606	-0.0310649	-0.0449852	0.122061	-0.00356551	0.060053	-0.170675	-0.1794	0.163943	-0.0453673	0.175224	0.108916	-0.210054	0.040754	0.0762451	0.105652	-0.121396	0.00897357	-0.00668178	0.0309996	0.201266	0.00473132	-0.105506	-0.311607	-0.0810426	-0.0125416	0.120717	0.0246125	0.0532099	0.0284617	0.191146	0.0735304
43	-0.0688005	0.067561	-0.0453038	-0.108365	0.063545	-0.113756	0.120189	-0.532096	0.136531	-0.0239204	-0.0815572	-0.303069	-0.363096	-0.0298989	0.333424	-0.201781	0.0827548	-0.254431	-0.045779	0.00849156	0.0782184	0.0254921	0.217781	0.00568574	0.0927265	0.283048	0.113071	0.164517	0.187213	0.0889064	0.0644431	0.00104458	0.0622637	-0.143435	-0.0864505	-0.00457046	0.0256074	-0.125034	-0.0133073	0.0690244	0.188511	0.0292145	-0.0123948	0.137274	0.00415492	0.0462135	-0.0520163	-0.218819	0.118375
44	-0.0168747	-0.0904079	-0.0339064	0.0279115	0.236016	-0.257668	-0.146848	-0.422444	0.228003	-0.0743104	0.194261	0.115839	-0.155401	0.122139	0.348743	-0.105285	0.0255288	-0.0292809	-0.221135	0.134001	-0.114671	0.0882131	0.157502	0.148376	0.133045	-0.0764941	-0.0455051	0.116746	0.273305	0.0846523	0.0266401	0.0347051	-0.165856	-0.0377902	-0.0357295	-0.135634	-0.0308001	0.00678087	0.201102	-0.004245	-0.0568459	0.116266	-0.0320996	-0.0751773	0.0399097	-0.121458	-0.210924	0.0270389	-0.0588099
45	-0.0265104	0.234775	-0.0392929	-0.046875	0.182702	-0.189551	-0.156969	-0.344663	0.481563	-0.0951991	0.118508	0.178622	-0.460415	-0.336394	-0.246977	-0.0324596	0.0840891	0.0377537	0.0266904	-0.157864	0.147699	-0.0265583	0.08886	0.0567151	-0.0378315	0.0362063	-0.108218	-0.0800653	-0.206567	-0.00396252	-0.0312737	-0.0249373	-0.117837	0.134222	0.037194	0.0459442	-0.0907164	0.214546	0.119745	-0.077733	0.0265159	-0.0618158	0.114431	-0.0589073	-0.0602455	-0.0911763	0.152556	-0.133201	0.0436743
46	-0.0771351	-0.115756	0.00614021	-0.187342	0.164868	0.0755917	0.316006	-0.36674	-0.246893	0.0677212	-0.0551863	0.184361	-0.0984061	-0.132725	0.114405	0.0544633	-0.310164	0.190572	-0.254662	0.237861	0.126386	0.313464	-0.101861	0.127709	0.0690904	0.175061	-0.172557	0.018881	-0.0403103	-0.0425573	-0.0244534	0.0968853	-0.0875571	0.156917	0.0286054	0.148164	0.133536	-0.156432	0.0928452	0.144211	-0.0861535	-0.0952773	0.0635473	-0.0788742	0.024244	0.0599245	0.0724672	0.00029142	-0.10067
47	-0.180231	0.0266118	-0.283877	-0.279405	0.179065	0.173848	0.21552	-0.446623	-0.162505	0.15292	-0.218485	0.336942	0.0694748	-0.0112897	0.0766789	0.113906	-0.257931	0.00903978	-0.0941729	0.0997222	0.308373	0.0991335	-0.310703	0.0721496	-0.0648489	-0.000685932	-0.175298	0.031311	-0.0301039	0.059765	0.112361	0.0249445	0.0796538	0.156407	0.0558921	0.229504	0.0109621	-0.129528	-0.0135455	-0.0659402	0.101635	0.0400382	-0.0768115	-0.113569	0.0862793	0.00254646	0.0873716	0.0304408	0.0828102
48	-0.468659	-0.299719	0.156378	0.122127	0.0856421	0.196333	0.0531255	0.0709223	0.112123	-0.00638921	0.249282	-0.332452	-0.0643677	-0.0775693	-0.080174	-0.0401313	-0.158252	-0.113458	0.164419	-0.103792	0.239119	0.122753	-0.0394204	0.0419842	0.041907	0.0199097	0.0123237	0.161108	-0.118243	-0.0485903	-0.0841572	-0.0225907	-0.0618768	-0.0363339	0.0774232	0.0258764	0.146303	-0.0247761	0.108425	0.0139595	-0.0607852	-0.100872	-0.0864066	0.0869078	0.00196441	-0.041603	-0.119319	0.0640365	-0.136072
49	-0.501259	-0.284998	0.129635	0.0570806	0.294166	0.00986902	-0.00165284	0.0990316	-0.0164551	0.0332085	0.0208532	-0.186191	-0.0621759	0.210891	-0.0461404	-0.277116	-0.104058	0.0343126	-0.0125951	0.0154026	-0.0190147	0.103597	-0.0115712	-0.211172	0.0360606	0.0274078	-0.0483187	-0.0697307	-0.0490061	-0.0804183	0.0458683	0.00416968	-0.0836801	0.0553954	-0.0625583	-0.0157986	-0.0494132	0.055879	-0.0963234	0.00921263	0.0763966	-0.0132434	-0.00108826	-0.00814803	0.0577432	-0.0392003	0.0524247	0.0758195	0.0411278
50	-0.142425	-0.347769	-0.218565	-0.238317	-0.178853	0.0479283	-0.041383	-0.179938	-0.295954	-0.0708555	0.0807796	-0.181422	-0.308541	0.0551357	0.189937	0.16541	0.212461	0.401412	0.162254	0.0290152	0.00489219	0.0332001	-0.195883	-0.135465	0.178825	0.0255497	0.166538	-0.0561273	-0.108261	-0.0215731	-0.0539524	0.0999684	-0.0254049	-0.0924057	-0.0696812	0.0553628	0.0521678	0.00268596	-0.0597171	-0.0199325	-0.107091	-0.00898891	0.0657835	0.0172214	0.0649428	-0.0780654	0.0498144	0.0569557	-0.0179507
51	-0.233542	-0.275655	-0.203655	-0.297269	0.133091	-0.14062	-0.282059	0.148085	-0.142713	-0.156631	-0.13186	0.152727	-0.461897	0.0458669	-0.299094	0.00687656	0.142035	0.0213311	0.129493	0.130832	-0.116032	-0.0339304	-0.0486643	-0.154267	0.0512542	-0.0242832	0.132631	0.145826	0.0716718	0.204613	0.0850441	-0.211736	-0.00184548	0.138146	0.064473	0.165294	-0.0578975	-0.0459002	0.120463	0.0386068	0.106162	-0.0615068	-0.0450216	0.0440991	-0.0925634	-0.0345169	0.0125026	0.0210928	-0.00907479
52	-0.0423217	-0.27883	0.0181405	0.183595	0.124994	-0.238496	-0.109845	-0.107882	-0.135544	0.038835	-0.124423	0.115363	0.178009	-0.188638	-0.111364	0.0399897	-0.197598	-0.141171	-0.0353094	0.217647	0.119656	0.128565	-0.177511	0.0834076	0.0893357	-0.067154	-0.160163	-0.0272771	0.1295	-0.0559849	-0.133609	0.148602	-0.0922775	-0.104146	-0.11033	-0.0838042	0.0613885	0.0749712	0.132194	0.0122473	0.0609446	0.2667	0.0575269	0.157503	-0.0233208	-0.0521657	-0.140562	-0.104912	-0.147682
53	-0.165663	-0.2333	0.013883	0.107829	-0.324731	0.0161187	0.400717	-0.0146855	-0.0451293	0.0623029	0.00691058	0.164614	-0.0570842	0.0232639	-0.164053	-0.175963	-0.226443	-0.00176521	0.115841	-0.110879	0.0821425	0.132915	0.0662279	0.0607565	-0.104863	0.0268247	0.018439	-0.0702274	-0.0650457	-0.0315729	0.0425357	0.020477	0.0664886	0.0104052	0.00701161	0.0601152	-0.0537605	0.0812324	-0.11194	-0.00270256	0.0283833	0.0440233	-0.0285619	0.000897737	-0.0724001	-0.0398337	-0.0599023	-0.0381426	-0.131109
54	-0.230016	-0.212042	-0.0348221	0.00323505	-0.122499	-0.0443977	0.200549	-0.032256	0.00379843	-0.195159	0.0987129	0.177988	-0.0182303	-0.10124	-0.114723	0.0627648	-0.110639	-0.0355909	0.293931	-0.266651	-0.254644	0.0121073	0.109058	0.160054	0.22723	-0.109544	0.0948339	-0.10118	0.00114972	-0.12331	-0.144803	-0.00139615	0.0311639	-0.0367049	-0.0744181	0.139104	0.082741	-0.0457853	-0.126225	-0.130036	0.228194	0.00117324	-0.00237709	-0.0157097	0.0313866	0.00311466	-0.0616813	0.0103409	0.122793
55	-0.335044	-0.279109	0.188726	0.0932741	-0.0180236	-0.173512	-0.0122874	0.0349378	0.0672075	0.0620201	0.310728	-0.0524365	0.0242896	0.193226	0.178496	-0.470453	-0.0422619	0.00523684	-0.0167266	-0.222002	-0.0526609	0.121772	-0.0499584	-0.0145833	-0.0572824	0.0085526	-0.0526856	0.0412846	0.0295938	0.0579054	0.0400161	-0.115642	0.114086	0.0761994	0.0695647	0.0240728	0.102379	0.0370147	-0.131083	0.0122406	0.0199491	0.150837	0.000946959	-0.0125084	-0.0983278	-0.146852	0.067121	0.139802	0.128426
56	-0.391985	-0.263279	0.00715647	0.110839	-0.291486	0.0177351	0.0180283	0.222481	-0.0524991	-0.0649851	0.168076	0.162286	-0.018264	0.0333351	0.0913973	-0.188641	0.0930638	0.0232001	0.103779	-0.369887	0.0704909	0.0777654	0.0372966	-0.0488882	0.0583213	0.0937318	-0.0760246	0.00624676	-0.00579594	-0.215715	-0.07896	-0.0134173	0.0644861	-0.0314379	0.113136	0.00788881	0.138248	0.00216609	0.00468449	-0.0650081	-0.0433526	0.052077	0.0218341	-0.110682	0.0274973	-0.0397782	-0.0447191	-0.0457452	0.0301296
57	-0.234485	-0.206406	0.0350866	0.00651086	-0.286304	0.0887777	0.331595	0.0401729	0.0368204	-0.0598828	-0.041742	0.0800298	-0.0375559	-0.0833073	-0.0327507	-0.104535	-0.0318082	-0.129769	0.0947118	0.0495203	0.13557	-0.0560253	0.181162	-0.254063	0.0735873	-0.0800089	-0.125269	0.134297	0.126346	-0.165319	0.0930668	-0.0642842	0.268571	-0.0344065	0.0650131	0.0187023	-0.0729633	-0.0541026	0.15183	-0.152678	0.141599	-0.0286869	-0.0271708	-0.0259999	0.129712	0.00808198	-0.0101855	-0.11993	-0.116093
58	-0.0948194	-0.053472	0.0303567	-0.232264	-0.189736	-0.201235	-0.121498	-0.0176423	0.358689	-0.172044	0.00430901	0.406216	0.0352335	-0.286725	0.132697	0.202327	-0.0608464	0.0215734	0.0857266	0.0975884	-0.0921704	0.00726919	-0.00618779	-0.0232089	0.0904731	-0.115169	-0.0335686	-0.0480958	0.0389048	-0.0701046	0.134289	0.0263997	0.0375318	-0.209753	-0.154877	0.0386565	-0.0127678	-0.0342067	-0.271153	-0.0453196	-0.204398	-0.159696	0.0506494	0.00610894	0.0986209	-0.248383	-0.0277661	-0.176477	-0.0267266
59	-0.462677	-0.421083	0.154585	0.126537	0.43835	-0.0577308	0.147188	-0.173152	-0.431984	-0.00907712	-0.00288513	0.0346117	-0.103327	0.023916	-0.0690654	0.0891969	0.0154126	0.0791789	-0.087038	-0.179743	-0.268358	-0.0440432	0.107251	0.225099	-0.156958	-0.0508136	0.00905604	-0.0347294	-0.132162	0.0805762	0.0419826	-0.00838428	0.0927918	-0.12094	0.0337284	-0.107295	0.04966	0.0536014	-0.0132619	-0.0189776	-0.0571395	0.0597257	-0.0326697	-0.0554186	0.0391547	-0.069184	-0.0235771	-0.0161331	-0.0295587
60	-0.36105	-0.432994	-0.124976	-0.0585021	-0.169344	0.0336329	-0.120705	0.0646221	-0.242785	0.00805852	-0.0900818	-0.0595998	-0.128119	0.189438	-0.177159	-0.133552	0.0637768	0.0363269	-0.276576	-0.00152946	0.117322	0.08167	-0.127279	-0.136551	-0.0916033	0.0200756	-0.13655	-0.11186	0.0926377	-0.116535	-0.0969697	-0.0686407	-0.24753	-0.152049	-0.049093	-0.0904686	0.056842	-0.0698118	-0.0303296	-0.0218601	-0.0216701	-0.178123	0.0295336	0.0916958	-0.0248906	0.0809752	0.0183102	-0.01407	0.0921579
61	-0.14539	-0.212117	-0.386164	-0.149926	-0.290493	-0.0615123	0.258395	-0.146789	-0.184268	-0.0685255	0.0450358	0.109439	0.104421	0.181382	-0.0491358	-0.147176	0.0631469	-0.081859	0.0791336	-0.0700593	0.028482	0.155818	0.0942261	0.204088	0.0974941	-0.0280665	0.0622907	-0.144366	0.0995032	0.0883172	-0.0493496	-0.136556	-0.134238	0.0937746	-0.00844726	-0.0160825	-0.0851061	0.0843145	-0.152763	0.249106	-0.0465542	-0.0661456	-0.164131	-0.0305064	0.054181	0.0658766	0.0181528	-0.0130712	-0.117461
62	-0.172704	-0.407454	-0.218398	-0.172443	-0.269161	0.0485545	-0.0866499	-0.266158	-0.256352	-0.0181034	0.000314196	-0.110723	-0.34218	0.100374	0.221139	0.063135	0.224968	0.352199	0.145858	-0.0664307	0.0414772	0.0650808	-0.124861	-0.143193	0.113836	0.00901526	0.154656	-0.0243958	-0.0422046	0.0414851	-0.0290114	0.110797	-0.139308	-0.0875685	-0.0352517	-0.00836332	0.0827979	0.0321488	0.0309494	-0.054922	-0.0410292	-0.00376211	0.022635	-0.0272221	0.0274099	-0.0587235	-0.0444981	0.0488524	-0.0308618
63	-0.188126	-0.195295	-0.252138	-0.102045	-0.116523	0.0804982	0.0378591	0.0617319	0.266042	-0.0912599	-0.00333408	0.0399014	0.160297	0.0780509	-0.0656078	0.12237	-0.097058	-0.250224	0.0785048	-0.10632	-0.23435	-0.0516155	-0.0485875	-0.0290348	-0.0823025	-0.0213139	-0.0908609	-0.0917604	0.0562973	-0.00302971	-0.246575	0.01935	-0.129124	-0.0377396	-0.0515544	0.0180111	-0.0275073	0.0995284	0.196384	0.137015	0.00704206	-0.0528353	-0.0435875	0.101484	0.0707142	-0.0327728	0.156951	0.0891705	-0.00133608
64	-0.456405	-0.240383	0.165673	0.158007	0.146116	-0.0807032	-0.0722556	0.079191	0.0851323	-0.0179111	0.171461	-0.0437362	-0.0611467	0.0958085	-0.0363425	-0.224296	-0.102169	0.0368639	0.159636	0.136914	0.0855987	0.0484908	-0.097099	0.0117506	0.0961659	-0.0508788	0.176979	-0.107516	-0.0137576	-0.147869	0.0606881	0.0646592	-0.0936205	0.0726396	-0.0382348	0.027451	-0.103454	-0.00960078	-0.198591	-0.035906	0.00896517	0.0416018	0.0258776	-0.0349026	0.0350538	-0.0182589	-0.0633064	-0.131232	-0.107487
65	-0.420762	-0.278006	-0.141283	-0.176431	0.179946	-0.0280162	-0.0810343	0.111282	0.0584914	-0.136103	-0.17141	0.127643	-0.0245105	0.064724	-0.255476	0.165512	0.138079	-0.0744975	0.0165136	0.0594601	-0.136161	0.166815	-0.0830518	0.0836926	0.165256	0.0705294	0.244945	-0.00327649	-0.0458693	-0.0938445	-0.131024	0.124749	-0.0541231	-0.0183508	0.24428	-0.00465883	-0.171471	-0.00377697	0.000501557	-0.0997874	-0.0151114	0.0826028	0.0528881	0.0235342	-0.0795942	0.0248497	0.0459812	0.0805482	-0.244616
66	-0.373366	-0.264235	-0.130096	0.0040236	-0.136381	-0.0774629	-0.0318123	0.0871574	0.093706	-0.135448	0.154371	-0.00912637	-0.045108	-0.0207089	-0.0148526	0.0610414	0.193609	-0.0896779	-0.0269889	-0.150873	0.00901017	0.0259446	-0.0363845	0.225598	-0.0619198	0.0734996	-0.0374413	0.0440412	-0.129417	0.0107745	-0.0487029	-0.00327826	0.268922	-0.00899921	0.0353468	0.039001	0.0449529	-0.11675	0.0142739	-0.0862807	-0.0316073	0.0429366	0.0638698	-0.0562161	-0.00135515	-0.0932823	0.019327	0.0348607	0.0291909
67	-0.365149	-0.215863	-0.0268113	-0.0351529	-0.127378	0.0888662	0.0281486	0.188443	0.379748	-0.21632	0.0976507	-0.155276	0.0810668	-0.0736278	-0.105792	0.0219219	-0.120683	-0.161881	0.265721	-0.118718	0.0146466	0.0932744	-0.198077	0.163655	0.11488	0.0836301	0.143165	0.027841	0.0691699	0.0819401	-0.141949	0.123962	0.0222658	-0.0084081	0.0281102	0.1674	-0.0143375	-0.017823	0.232769	0.0893275	0.0375848	-0.0812056	-0.0336799	0.0287707	0.0808558	0.0234737	0.0251168	-0.0479725	0.092828
68	-0.451366	-0.40345	-0.0577683	-0.0657814	0.053051	-0.0453876	-0.0518456	0.119022	-0.260634	-0.133021	-0.0435648	-0.0916229	-0.215037	0.101258	-0.283078	-0.128069	0.0852395	-0.0816895	0.00412044	0.157084	0.166358	-0.0189594	-0.0400556	-0.0789478	-0.0268861	-0.0426774	0.0351685	-0.0517444	0.237557	-0.0384197	0.0178513	-0.108272	0.0276183	0.0404213	-0.0455158	-0.0221362	-0.0075711	-0.0793962	0.0209712	0.0898533	0.0125398	0.0198904	-0.00627612	-0.00436503	0.0129709	0.0282741	0.0702607	-0.02795	0.0735087
69	-0.501711	-0.451117	0.1031	0.18383	0.445748	0.0960168	0.034989	0.0169993	-0.35905	0.013544	0.07786	-0.0616823	-0.176308	-0.00140181	-0.150414	0.0778179	0.083769	-0.160395	-0.0329284	-0.0425225	-0.178946	-0.108088	0.158395	0.117218	-0.123913	-0.0474948	0.0246128	0.0185796	-0.112291	-0.00126162	0.0871774	-0.0150694	0.0186868	0.00257153	0.0422731	-0.010046	0.041095	0.0152627	0.018918	0.0118158	-0.00854079	-0.0423066	-0.00369344	-0.104449	0.0586206	0.0188182	0.022259	-0.0104147	-0.0106368
70	-0.29371	-0.383347	0.219133	0.347538	0.156604	-0.113778	-0.361634	0.138194	-0.176516	0.101419	0.352998	-0.14176	0.117519	-0.162811	0.0343211	-0.0236264	-0.0396609	-0.0625032	0.140079	-0.148726	0.20718	0.0868164	-0.132265	-0.0026605	-0.0692981	0.0234954	-0.0569289	0.185699	-0.00757953	0.107642	-0.0461721	-0.0667139	0.0776654	0.0191471	-0.0214695	0.00985179	0.0326586	-0.0155808	-0.0846599	0.0885185	-0.0903132	0.176919	-0.00674592	0.114462	-0.101933	-0.0249101	0.0303987	-0.017404	-0.069552
71	-0.000265152	-0.0284841	-0.255281	0.146227	0.205782	-0.157434	-0.314381	0.0441498	0.0324693	0.00403357	0.00219474	-0.240002	0.249963	-0.194235	0.107271	0.33759	0.250344	0.0216998	-0.179263	-0.0313052	0.242006	0.0828846	0.0474757	0.159838	-0.0604541	0.0505982	-0.0508649	0.0660256	-0.00441371	-0.135314	0.0633127	-0.146535	-0.03859	0.137933	-0.0963116	0.00664926	-0.0243427	0.0510275	-0.167483	-0.115989	0.188248	-0.0842361	-0.0737291	-0.0716229	-0.0551789	0.0456615	0.000678916	0.128592	-0.0229121
72	-0.392758	-0.206043	0.0313775	-0.0690491	0.221917	-0.0544479	-0.136365	0.137832	0.143816	-0.0670479	0.00119078	-0.0463117	0.112649	0.118127	-0.0644419	-0.16859	-0.147083	-0.0753782	0.00678905	0.135633	-0.0927236	0.0363677	0.0661075	-0.114211	0.0499354	0.0800154	-0.11156	-0.109431	0.0732427	-0.0686074	0.0331853	0.00815173	-0.114635	0.135945	-0.0465024	-0.0538679	-0.0178145	0.114418	-0.066562	0.116778	0.0588226	-0.155669	0.0263625	0.0186118	0.102658	0.00382195	0.0558047	0.072013	0.0857537
73	-0.340537	-0.242959	-0.0439602	-0.114484	0.0643953	-0.0673666	0.208483	0.0359022	-0.133222	-0.184803	-0.0791162	-0.00819379	0.168136	-0.0673769	-0.136567	0.126593	0.0790794	-0.0638609	-0.0162878	0.130126	-0.0179129	0.0459019	0.155894	0.138261	0.035186	0.0445203	0.000300964	-0.156956	0.264431	-0.181334	0.0590821	0.146359	-0.064223	-0.168479	0.131026	-0.0220287	-0.0155592	-0.00588333	-0.0871111	0.0160465	-0.00609473	0.114008	0.0447017	0.0563618	-0.0890285	0.101427	0.00625251	0.0281325	0.0674582
74	-0.0998998	-0.302771	0.0289885	0.323804	0.240853	-0.20373	-0.226708	-0.0888408	-0.310778	0.191251	0.146371	-0.00257083	0.0661206	-0.166475	0.151347	0.252602	0.110858	-0.0581356	-0.0104801	0.00366166	0.0301952	-0.00446568	-0.0254834	0.0510878	-0.005321	-0.0656219	0.120826	0.119853	-0.109164	0.11163	-0.00311018	0.0473897	-0.0418596	-0.0800348	-0.239765	-0.0961856	0.0214554	0.128511	-0.0563312	-0.0122779	0.0357799	-0.024242	-0.101493	0.00346319	0.0950172	0.0487745	0.0940722	-0.10886	-0.0153853
75	-0.313504	-0.31651	-0.123825	0.0320624	0.00910848	-0.221027	-0.299893	0.0692829	-0.00583019	-0.206448	0.257456	0.298588	-0.0657451	-0.103418	0.0216838	0.12156	0.141391	-0.0953215	0.171852	0.0328923	-0.0185447	-0.155169	0.0185148	-0.0155123	-0.190918	0.0740177	-0.250677	-0.0791874	0.165407	-0.0528198	0.0765983	0.00403228	-0.0612204	0.174405	0.101496	0.0559596	0.0268845	-0.0697738	-0.109092	-0.0320326	-0.045136	-0.140642	0.231638	-0.0253094	-0.0757934	0.17063	-0.164714	0.023737	0.000236612
76	-0.204867	-0.391917	-0.00949239	-0.130217	-0.176173	-0.0444232	-0.358052	0.0733699	0.102527	-0.00411428	-0.291941	-0.124151	0.0575829	0.00644005	-0.23297	0.120031	0.118569	-0.0229674	-0.0126628	0.317029	0.176354	-0.159134	-0.046709	0.0185638	0.114084	0.0179848	0.141505	0.0791804	-0.0509895	0.145107	0.0371291	-0.0360999	0.274659	0.0789656	-0.0581138	0.0134507	0.0645558	-0.0354668	-0.0127614	-0.0214252	-0.0921221	0.152673	0.135187	-0.0306347	0.107709	0.0221149	0.0773615	0.0087128	0.0724003
77	-0.00671721	-0.2046	-0.0648752	0.0333796	-0.18812	-0.0213729	-0.114142	-0.22505	0.0257318	0.0740205	0.359542	0.00843421	0.138856	0.264508	0.0823185	0.383471	0.311525	-0.172294	-0.0851442	-0.2063	0.0607441	0.0890917	-0.183816	-0.145767	-0.150755	0.0439169	-0.154677	0.238345	-0.00567655	0.0228011	0.00404794	-0.0451962	-0.0614582	-0.00950107	0.139931	-0.0509352	-0.116531	0.0127165	-0.0202243	-0.0724004	0.121635	-0.0262365	0.0321249	0.0564798	0.0377584	0.147835	0.0228082	-0.11488	-0.0449871
78	0.00568699	-0.400985	-0.0762387	-0.112172	-0.506317	-0.0219108	-0.266966	0.0329453	0.119171	0.0993039	-0.412761	-0.0241407	0.121882	0.10211	-0.260749	-0.0207952	-0.0884491	0.0562614	-0.183152	0.117151	0.0457764	0.0023962	0.00942418	0.132301	-0.0133003	0.0432968	0.0192691	0.0397739	0.0589831	0.0527351	-0.0509334	-0.114538	0.117056	0.031082	-0.0711199	-0.138445	0.0858799	0.110452	-0.062339	-0.0454639	-0.0287924	0.0536742	-0.00750012	-0.0035872	0.0708549	0.0342907	0.0100248	0.000112741	0.071303
79	-0.277292	-0.293088	0.148138	-0.131137	-0.0236362	-0.138641	0.123048	-0.109931	0.138859	-0.0703747	-0.0761511	-0.156844	0.261663	-0.0983385	0.228431	0.129689	0.200054	0.0202096	-0.00326576	0.12808	-0.0511944	-0.0522301	0.11595	0.0424591	0.188656	0.0224736	0.142233	-0.144852	0.0501868	0.235397	0.0771398	0.135857	-0.143923	0.0966599	0.217033	-0.0482604	-0.0286178	0.00887695	0.0996612	-0.00931125	0.0748355	0.019852	-0.000929064	0.0141718	-0.175881	-0.032378	0.0566446	0.116556	0.053678
80	-0.195383	-0.0967324	0.208762	0.090297	0.0723884	0.04578	0.241142	-0.142468	0.0460587	0.123894	0.0405544	0.313534	-0.08688	-0.204154	-0.0853546	0.137729	-0.271763	-0.140167	-0.0559777	0.0913718	-0.0700425	-0.144469	-0.112983	0.155376	0.132463	-0.228592	-0.0357167	-0.0647567	-0.16712	-0.00259199	0.0472881	-0.128289	-0.0771071	-0.0258608	0.00981569	-0.0472963	0.104243	-0.0911633	-0.0290455	-0.195388	0.16093	-0.00257703	0.0297258	0.194678	-0.0351423	0.0327113	-0.0609133	0.171036	0.0842005
81	-0.306928	-0.250367	0.0438988	0.0164753	-0.18676	0.124276	0.248873	0.0528775	0.0217221	0.0317702	-0.0109451	-0.177344	0.0152831	-0.125145	0.128321	0.092963	-0.00828017	0.273624	0.175852	-0.0600565	-0.140308	-0.0953975	-0.0538992	0.160721	-0.148376	0.0513008	-0.0590977	0.00252636	-0.108879	0.107785	0.0260869	0.0921278	0.11682	-0.0595603	-0.183843	-0.030634	-0.0561145	-0.0737457	0.140467	0.141313	-0.0589222	-0.19796	0.0125465	0.0328979	0.0226154	0.133945	-0.115312	0.035003	0.0896567
82	-0.418706	-0.375707	0.292507	0.0779246	-0.0506404	0.191804	-0.0726822	0.113172	0.263697	0.0501316	0.114635	-0.259445	0.119953	-0.125527	0.000871919	0.0913224	-0.0946214	-0.173353	0.126567	0.12473	0.147601	-0.142443	-0.0131937	0.0669755	-0.0402683	0.00533993	0.0587005	0.0794904	-0.0591252	0.0906235	0.0680729	0.0358975	0.0235209	0.112326	0.0401131	0.0493813	0.0911182	-0.0170834	0.0499417	0.119029	-0.144946	-0.043059	-0.0628512	0.056211	-0.102406	-0.0641053	0.0356672	-0.0244376	-0.0929482
83	-0.114039	-0.274638	-0.0964234	0.0339318	-0.181746	0.0928807	0.0909563	-0.183878	0.129286	-0.0217103	-0.0687253	0.383659	-0.0722235	0.100105	0.0405669	0.0115945	-0.110997	-0.000586047	-0.0256507	-0.122698	-0.0979812	0.11563	-0.14478	-0.157828	-0.0645263	-0.0118683	-0.14533	-0.0846573	-0.14427	0.0811401	-0.0381333	-0.0839506	-0.0100909	-0.00515956	-0.0174779	-0.106746	-0.162797	-0.0165901	0.0222025	-0.0780181	-0.0208838	0.00339612	-0.0471421	0.0946889	0.0618172	-0.0226041	-0.0147082	0.0367448	-0.0258009
84	-0.367872	-0.352956	0.0828603	-0.0520864	-0.547649	0.127297	0.185249	-0.0177542	0.175949	0.0953898	-0.217378	-0.0991712	0.14008	-0.0254342	0.0819687	-0.0371831	0.0627916	0.219415	-0.00651163	0.022159	0.140181	-0.106732	0.0212034	-0.0391663	-0.113147	-0.0278552	-0.0166973	-0.118147	-0.0691734	0.0370986	-0.0174705	0.0579536	0.0538309	-0.013531	-0.104686	-0.0882282	-0.13113	0.0107258	0.0248023	0.00564682	0.00652227	0.121762	-0.0201333	-0.1444	0.0145579	0.0391344	-0.0541551	0.0207298	-0.0787521
85	-0.281114	-0.420259	0.121184	0.0181266	-0.0449662	0.0238801	0.174912	-0.210514	0.0744709	0.052918	0.0105792	-0.168076	0.097335	0.0783186	0.116794	-0.108494	-0.150345	-0.0107892	0.183808	0.176524	0.0188516	-0.0724618	-0.0444859	-0.247384	-0.168491	-0.140843	-0.026922	-0.120422	0.107497	0.00233055	0.0753352	0.146229	0.10991	0.0810165	0.00661196	-0.106356	-0.181262	0.065092	-0.0587061	-0.0543747	-0.0176274	0.106685	-0.0050971	-0.091214	-0.0637583	0.0375638	0.00202001	-0.0093306	-0.00180385
86	0.0402809	-0.218441	-0.0297167	-0.0280858	-0.477563	-0.129581	-0.0994173	-0.0139056	0.0277677	-0.00707986	-0.194637	0.225558	0.0369493	-0.20831	0.0336234	0.0435362	0.0183608	0.157589	0.235355	0.010621	-0.0440335	-0.165681	0.312736	-0.0693467	-0.0559316	0.0325955	-0.178449	0.116603	0.163439	-0.00497237	0.00904243	0.0520265	-0.131802	-0.0266737	-0.143219	-0.0574795	0.268331	0.192172	0.0571303	-0.0374393	0.126451	0.0360932	-0.203088	-0.00388698	-0.0868495	0.0136711	0.169526	0.078044	-0.0937101
87	-0.457272	-0.265195	0.0237959	0.055734	0.251499	0.025208	-0.250412	0.110848	0.162083	0.00826786	0.052531	-0.103641	-0.0789037	0.0965358	0.0301158	-0.0555428	-0.0698502	-0.0866607	-0.0597131	0.157185	-0.0333898	-0.0198222	0.0251707	-0.127451	0.0385363	0.018414	-0.0869554	-0.0312882	-0.0412034	-0.0473775	0.071629	0.082203	-0.126822	0.0696555	-0.0782532	-0.0586098	-0.0488732	0.0455745	0.0131545	0.0191709	0.0465752	-0.0477406	0.0191749	-0.0821044	0.00591322	-0.00620184	-0.0774438	-0.0162592	0.0393725
88	-0.380106	-0.209259	0.183757	0.132523	0.110927	-0.116403	0.154614	-0.000903609	-0.0996231	-0.00656852	0.123179	0.230743	0.0418068	-0.0607858	0.262199	0.0775989	0.0691022	-0.0024728	0.13793	0.0464696	-0.00913472	-0.191952	0.0610294	-0.239661	-0.0245894	-0.166704	0.0399855	-0.0454357	0.0321534	0.0531955	0.0282104	-0.0298385	0.156333	0.221589	-0.12563	-0.00431839	-0.0788345	-0.0547545	0.0525941	0.115422	0.0983712	0.0170409	0.0675183	0.00110111	0.0887489	0.0571515	-0.00738798	-0.00489113	0.00526052
89	-0.154284	-0.291181	-0.0261862	0.00136886	-0.436039	0.0052421	-0.247626	-0.0488991	0.373387	0.0446217	0.130071	0.190946	-0.00853638	0.0790455	0.13335	-0.0925004	-0.024968	-0.0901558	-0.269498	-0.0224987	0.0732512	0.0610887	-0.0637157	0.162622	0.050552	0.0134676	-0.10154	0.0296933	-0.16821	0.201529	0.0038676	-0.153567	-0.00994666	-0.0919501	-0.0799604	-0.115338	-0.00671299	-0.0953651	-0.0263753	0.0356123	0.0527628	-0.039629	0.0555373	-0.00704793	-0.0549292	-0.0276155	-0.133928	0.108459	0.0686656
90	-0.462204	-0.418147	0.149698	0.091293	0.376787	-0.0468506	0.131506	-0.119338	-0.325537	-0.0196913	-0.11207	0.00230316	-0.00337411	-0.0131775	-0.121456	0.105857	-0.0183602	0.0202794	-0.084875	-0.024509	-0.268137	-0.139237	0.137353	0.234114	-0.196511	-0.0316082	-0.0258588	-0.0379176	-0.00667769	0.070696	0.0902377	-0.0188946	0.144957	-0.0106824	0.00819271	-0.0603694	0.032477	0.03206	0.0386096	0.0710103	-0.0458836	-0.0201091	-0.0444287	-0.0141273	0.0572609	-0.0314371	0.0253578	-0.0370624	0.00503209
91	-0.229086	-0.375743	-0.130218	-0.240444	-0.43238	0.207985	-0.0239409	0.0739214	0.127368	0.140025	-0.308509	-0.111826	-0.0230226	0.0544045	-0.26206	-0.00451538	-0.00426432	-0.141915	-0.203234	0.175843	0.0347559	0.0327108	0.0597881	0.142225	-0.0626291	-0.00731646	0.124028	0.0554141	-0.125185	-0.109932	0.0283936	-0.105548	-0.0408295	0.0461188	0.0648121	-0.142616	0.117904	0.00659281	-0.0406484	-0.0748085	-0.0961802	-0.0752858	-0.0907038	-0.0252566	0.00608881	-0.0450287	-0.0897871	-0.114857	0.0314876
92	-0.343057	-0.242361	0.316215	-0.14508	-0.0309383	-0.0347996	0.301139	-0.133334	0.244728	-0.0146129	-0.105739	-0.233476	0.313921	-0.180148	0.191325	0.0764924	0.0997781	0.102416	-0.121373	0.00551499	0.0106318	-0.03703	0.0806298	-0.131095	0.00515759	-0.074222	0.0713253	-0.0121533	-0.0164726	-0.0179534	0.0100894	-0.046375	-0.0908679	0.0697296	0.190197	-0.0219818	-0.0863902	-0.0725647	0.033204	-0.0118528	0.0315373	-0.0374177	0.0843856	-0.0302654	-0.0184929	-0.0467346	0.0462353	0.0235381	-0.0422166
93	-0.272727	-0.0994229	0.316436	-0.0107707	0.0296817	-0.0370445	0.351061	-0.149443	0.180617	0.163306	-0.0408102	-0.242107	0.199538	-0.0999341	0.0919513	0.0868419	0.0347033	-0.0113893	-0.201419	-0.0933369	-0.0755518	0.0291722	-0.0534635	-0.0553462	0.0817568	-0.187075	0.168532	-0.0225073	-0.0212693	0.011544	-0.0313331	-0.104118	-0.0687402	-0.104411	0.113883	0.0617164	-0.0534274	-0.0547205	-0.0706936	-0.0872913	0.0302985	-0.00234983	-0.104912	0.0637221	-0.0132907	0.0265312	0.0899621	-0.058704	0.0921946
94	-0.254626	-0.210761	0.147406	0.141806	0.272522	-0.143326	-0.228077	0.135395	0.106466	0.0955602	-0.299383	-0.129992	0.223003	0.12919	0.0314357	0.0383706	-0.114269	0.222382	-0.15102	-0.0812469	-0.139842	0.0231715	-0.0342498	-0.150875	0.108141	0.120485	-0.172623	0.142723	-0.178942	-0.0335644	-0.180901	0.106453	0.0578677	-0.0404928	-0.0478996	0.107321	-0.0652669	0.11604	0.000596733	0.0110628	0.0427767	-0.0151442	0.0163939	-0.0669807	0.0112363	-0.00216739	-0.0198268	-0.0477059	0.0200618
95	-0.446259	-0.200764	0.174203	-0.0193438	0.263664	-0.027036	-0.106284	0.113128	0.202998	-0.00913875	-0.21312	-0.0720674	0.0989726	0.149151	0.0788581	0.0240924	-0.103114	0.17963	-0.192749	-0.0991017	-0.223339	0.0895753	-0.0174003	-0.130551	0.0770633	0.100703	-0.0714626	0.0404734	-0.0838766	0.020713	-0.060818	0.121577	-0.0029834	-0.112624	-0.0699617	0.131002	-0.0214014	0.0710713	-0.00996805	-0.0783547	0.0887377	0.00915347	-0.0325115	-0.0255516	-0.0189908	0.101946	0.00323666	-0.0987135	0.143277
96	-0.146003	0.350173	-0.245264	-0.217562	0.154496	0.0320826	0.295434	-0.0670846	-0.0749426	0.156646	-0.143924	0.0428335	0.0136747	0.0326623	-0.1491	-0.169839	0.103169	0.00968483	-0.130143	-0.104143	-0.0410394	0.00294651	0.0871307	-0.011019	0.00904373	0.201675	0.0575108	0.0919877	-0.0204612	0.0679085	-0.0493084	0.135394	0.191042	0.128716	-0.104556	-0.0306937	-0.105107	0.033686	-0.110519	-0.0752703	0.0194395	0.0426198	0.0962021	0.273697	-0.0870026	-0.0563641	-0.00944891	0.0412925	-0.0729781
97	-0.243818	0.46826	-0.394856	-0.353514	0.218943	0.0440267	-0.0764145	0.0801231	-0.00246634	-0.124603	0.0711281	0.133434	0.292429	0.0455423	0.0530004	-0.071877	-0.175655	0.208254	0.102691	-0.0156627	-0.0119925	0.0906451	0.210844	-0.0417831	-0.00683691	0.23751	-0.00337314	0.0518609	-0.0760705	0.171297	-0.0344177	-0.111532	0.0332839	0.0447506	0.150064	-0.175614	0.0540245	-0.0315723	-0.0492295	-0.0674655	-0.0745506	0.0339273	-0.0432133	0.0820017	0.0474198	0.0345221	-0.044774	0.0463541	-0.0194919
98	-0.249556	0.437573	0.103524	0.00875968	-0.0354614	-0.103611	0.145398	-0.0791184	0.0320577	-0.143171	-0.0229585	0.160628	0.0820904	-0.226707	-0.124926	-0.257111	0.0944236	0.0148607	-0.207176	-0.169926	0.0505467	0.0146319	-0.120952	0.0209657	0.00964269	0.254052	0.184626	-0.0118891	-0.0691369	-0.0205627	0.193217	0.0882081	-0.0126448	0.0696198	-0.0994859	0.0433511	-0.0297672	0.0716184	-0.046423	0.154724	-0.0452833	0.0110749	-0.0852941	-0.0838515	0.0130489	0.114093	-0.0178513	0.0527627	-0.021603
99	-0.210953	0.407119	-0.398923	-0.159176	0.0310514	0.22998	-0.174272	0.192937	-0.0641528	0.0442224	0.402981	-0.040279	0.0188901	-0.100896	-0.0219292	-0.0474924	-0.0837319	0.020424	-0.0435247	0.187086	0.0286572	-0.251545	0.0197635	0.0578078	-0.040921	0.11429	0.0339625	-0.0570445	-0.0581994	-0.0793725	-0.00724696	0.0545571	-0.0857132	-0.138724	0.0765082	-0.0398164	0.00110429	-0.0961267	0.0382184	-0.0473201	0.0895454	0.0621966	-0.0809834	-0.100095	0.0486455	-0.0727209	-0.0166641	-0.0265469	0.0519027
100	-0.329913	0.433229	-0.321093	-0.216979	0.173439	0.200696	-0.0109845	0.12071	0.120469	0.280334	-0.185803	-0.164515	-0.152205	-0.122627	-0.0580165	0.0398491	0.099523	0.111271	0.196949	-0.235609	-0.0250589	0.0396003	0.0880646	-0.0680988	0.0341759	-0.174198	-0.238913	-0.0524678	-0.00694634	0.107822	-0.0132453	-0.0337645	-0.0655143	0.0882632	0.0417057	-0.154957	-0.0351577	-0.102334	0.0236474	-0.030073	-0.159152	0.0867058	-0.0771612	0.102202	0.0411887	0.103962	-0.0808224	0.00121951	-0.0389026
101	-0.212122	0.545372	-0.31808	-0.14411	-0.0738864	0.0752372	-0.125058	-0.144096	-0.0554075	-0.241793	0.196686	0.0357057	0.0692176	-0.172109	-0.0834213	-0.0828285	0.0965179	-0.101178	-0.240256	-0.0188628	0.0607437	-0.323936	0.018127	-0.0751076	-0.0820901	0.111181	0.0929935	-0.171051	-0.101871	0.0204351	-0.143777	0.026202	-0.0350269	-0.0338427	-0.0663689	0.133961	-0.134133	-0.0135397	0.0258282	0.0724233	-0.0279949	0.113574	-0.169465	-0.0327315	0.166786	-0.0526436	-0.097248	0.0491363	-0.00140594
102	-0.208688	0.412886	-0.389189	-0.309849	0.115405	0.123296	-0.0478151	0.0380869	0.0331681	0.0916506	-0.115172	0.103582	0.141355	0.0385518	-0.0737489	0.171607	0.0389435	0.0507085	0.0165964	-0.224386	-0.22464	-0.0739109	-0.142457	0.0210963	0.0340553	-0.0398381	0.0338689	0.24282	0.260161	-0.0691089	-0.0893168	-0.150238	-0.0328381	0.0177853	-0.101394	-0.0228719	-0.0965727	-0.0841476	-0.0703364	0.0373066	0.0446113	0.160393	0.0816583	0.00480674	0.0964141	-0.0112212	-0.0214777	0.0391882	-0.0418688
103	-0.107933	0.352087	-0.250053	-0.162319	0.0089204	0.159238	-0.0253587	-0.0523482	0.0764241	-0.0500854	0.294789	-0.125026	0.175624	-0.0765889	0.108306	-0.0184739	-0.305093	0.155188	0.144798	-0.0395445	-0.137269	0.00294757	-0.247871	0.0606134	0.0887618	-0.0559195	0.0783046	0.117773	0.147482	0.0946887	0.103901	-0.164861	0.0238137	-0.0142381	-0.0966951	-0.07116	-0.00711552	0.0725794	-0.0812148	0.0401134	-0.11568	-0.0280214	0.039503	0.0707038	-0.0814765	0.20137	0.0734182	-0.0492113	-0.0273993
104	-0.253839	0.377419	-0.314776	-0.296399	0.174249	0.386998	-0.0461362	0.0986114	0.0706678	0.448048	0.00413287	-0.162047	-0.139517	-0.101624	-0.104502	-0.0938071	-0.0978594	-0.0398787	0.0432316	-0.0174868	-0.0521648	-0.0313136	0.043416	-0.00602211	0.0101522	-0.150629	-0.166616	0.0558164	-0.0649846	0.106616	0.0385368	0.126712	-0.0170566	-0.017109	0.0931672	-0.0724823	-0.0790343	0.0142052	0.0258333	-0.0561088	0.0122425	-0.0118988	-0.0341574	-0.1235	-0.0339589	0.00248107	-0.0218722	-0.103699	-0.0299443
105	-0.0787452	0.430264	-0.249562	-0.113673	0.174804	-0.174689	-0.133338	0.0886716	0.28636	0.25958	-0.00782601	0.319786	-0.109053	-0.0196616	0.104717	-0.0127545	0.168895	0.116173	0.0496358	0.0249351	-0.00855154	0.172909	-0.130335	0.105907	-0.130429	-0.0710488	0.0554862	-0.138306	0.0796123	-0.0240718	0.0213808	0.16734	0.152604	-0.0307694	0.176827	-0.129404	0.0229627	0.179107	0.0556553	0.038568	-0.00400288	-0.0109973	-0.0925631	-0.0271242	0.0256879	0.0690164	0.089124	-0.0209004	0.101284
106	-0.219049	0.34855	-0.323133	-0.207225	0.0103746	0.352184	0.0496984	0.121952	-0.0845799	0.326261	0.387862	-0.293514	-0.0393931	-0.0908099	-0.00507502	0.00235464	-0.142541	0.0141996	0.0578814	0.188105	-0.00550323	-0.0903597	0.0457325	0.0681718	0.0512787	-0.0619132	-0.051229	0.0259378	-0.0338291	-0.0875894	-0.0295014	0.12768	-0.0784357	0.00556023	-0.106147	0.0534958	-0.0565337	0.0166535	-0.0984823	-0.0638698	0.00817765	0.0542604	0.065793	-0.0654993	-0.107038	0.0144533	-0.0118932	0.0327275	0.0771153
107	-0.227068	0.326242	-0.383884	-0.133657	0.0332175	0.0959301	0.170289	0.0657185	-0.160147	-0.00102748	0.217499	0.0530129	0.114707	0.0214418	0.110191	0.141546	0.0922225	0.0371487	0.069555	0.168797	0.296238	-0.0172917	0.226444	-0.117397	-0.15611	0.0115014	0.0844975	-0.19347	-0.136396	-0.0849986	-0.180733	-0.0412754	-0.00543044	-0.0133949	-0.0956008	0.0471791	0.0172315	-0.000700851	0.0358545	-0.0227809	0.0977839	0.0354394	0.0307987	0.117719	0.00163431	-0.046504	0.0476151	-0.0044638	0.0963142
108	-0.276959	0.437419	-0.0293939	0.194138	0.0168354	0.0733406	-0.134079	0.36307	0.151489	0.326879	-0.057716	0.24388	-0.263807	-0.000444256	0.231456	0.0801284	0.0405706	-0.195779	-0.0216319	0.0785671	-0.0442135	-0.0172489	-0.0122471	0.0790124	0.0423942	0.157942	0.129136	0.00950628	0.00930917	-0.0405244	0.00108274	-0.0174746	0.00114875	-0.0410632	8.46722e-05	0.0344741	0.0228553	0.00187151	-0.0301325	0.0196807	-0.0402947	0.00212633	-0.0521243	0.0210162	0.0240931	0.0698689	0.0618651	-0.0259288	-0.0579043
109	-0.341398	0.107364	0.0785066	0.0270321	-0.00428662	0.0753357	0.323114	0.1242	-0.240066	0.155264	0.0445045	0.123466	0.154814	-0.177701	0.0642645	0.0631722	0.176322	-0.134731	-0.263887	-0.18007	0.130756	-0.0797268	0.0267162	-0.199083	0.0684851	-0.0918782	-0.0759941	-0.103173	0.0947584	0.0578745	-0.0634677	-0.268756	-0.136662	0.0213826	-0.00129847	0.0925124	-0.0103399	0.0201041	0.0856969	0.0474351	-0.222853	0.0351348	-0.122494	0.0169098	-0.0468313	-0.113177	0.0752844	-0.136035	0.0416939
110	-0.165566	0.408802	-0.338553	-0.246226	-0.0632853	0.0174422	0.171184	-0.0157794	-0.135354	-0.123057	0.0139045	-0.256555	0.169768	0.0277407	-0.0643421	-0.0494526	-0.0351676	0.00152991	-0.0328293	-0.0402816	-0.0784539	0.126568	-0.101192	0.169285	-0.111225	-0.106778	0.0319564	0.224689	0.266934	-0.090908	0.0898122	-0.125128	-0.0155991	-0.137721	0.00920378	-0.0221189	-0.0234121	0.0409009	0.0432123	0.055613	0.0865799	-0.0392264	0.197997	-0.145493	0.0338416	-0.209563	0.121561	0.00726488	0.0371655
111	-0.303929	0.284885	-0.0271194	-0.0226861	-0.00691809	0.134462	0.0721271	0.269755	-0.0679545	0.262925	-0.0480134	0.305514	0.018907	-0.037831	0.161937	0.0115759	0.0551423	-0.00728725	-0.00399355	-0.00451653	-0.0846366	-0.118687	0.00599325	-0.155092	0.225746	0.060107	0.0613747	0.10438	0.0860981	-0.072766	0.0752128	0.0635867	0.0919911	0.00337118	-0.00770583	-0.0770321	0.12843	0.0477273	0.0635836	-0.00348753	-0.0224115	-0.0381269	-0.0186483	-0.0829702	-0.0657152	0.02153	-0.017896	0.0907065	-0.047789
112	-0.281104	0.35855	-0.098728	0.124166	0.0145834	0.107965	0.0203447	0.348019	0.0451571	0.348513	-0.0990533	0.0760204	-0.264502	0.0462292	0.205008	-0.0101958	0.0043351	-0.202972	-0.0855214	0.0896911	-0.0117007	-0.0207593	0.0389668	0.0252172	0.0133482	0.217533	0.0931589	0.0618587	-0.0417485	-0.0362627	0.0664675	0.021498	0.0179658	-0.0873023	0.057718	0.0314277	0.0674647	0.0999208	0.00401163	0.0231248	0.0983522	-0.0039828	-0.0081781	-0.0573085	0.0353161	-0.00688831	-0.0029901	0.0386816	-0.0478645
113	-0.340348	0.659527	0.117046	0.252704	-0.183203	0.107682	-0.0176224	0.139525	-0.141089	-0.0559952	-0.289005	-0.229064	-0.219798	-0.0773863	0.135795	0.0306135	0.0715187	-0.0966103	0.00750785	-0.0668361	-0.0232727	0.0042164	0.0419142	0.0354	0.0426548	-0.081787	-0.102263	0.00835583	-0.029611	-0.105123	0.045185	-0.015841	-0.12809	0.116484	-0.0357456	0.0818196	-0.0154732	-0.0212084	-0.0602794	0.0139123	-0.0489671	0.122605	-0.00143881	0.0308809	0.132461	-0.0197465	-0.0762776	0.139956	0.0421657
114	-0.323903	0.461464	0.00489971	0.123763	-0.169439	0.125993	0.260343	0.269927	-0.208619	0.090771	-0.200553	-0.104526	-0.190561	-0.0304707	0.260909	0.0246386	-0.0278683	-0.0802875	0.0623947	0.0912082	0.0173169	0.183918	0.167088	0.0229165	-0.106585	-0.00122295	-0.0465455	0.0222298	0.0109746	0.0107026	-0.02118	-0.0375049	-0.011783	0.0400357	-0.0439178	-0.0219418	0.00421307	-0.034244	0.0113752	0.0286802	-0.0306289	-0.0381496	0.230354	0.13186	-0.0252304	-0.0875151	0.0410708	0.00243153	0.0411662
115	-0.31935	0.485708	0.0458587	0.181472	-0.148555	0.0876006	-0.00415176	0.136156	-0.140893	-0.247326	-0.130828	0.0441075	0.0200732	-0.0258813	0.0813625	-0.0845419	-0.0135202	-0.107472	-0.188677	-0.0865107	-0.121387	-0.103774	-0.26041	-0.115857	0.0927668	-0.211886	0.00241881	0.120265	-0.0676218	-0.187748	0.200111	-0.0302529	-0.0478872	-0.0275194	-0.0257915	-0.0498608	0.100842	0.0784525	0.140761	0.0092442	-0.0189483	-0.0670175	0.114078	-0.119364	-0.118004	0.0378889	0.0143033	0.035433	-0.0759377
116	-0.292212	0.602564	0.110205	0.332026	-0.180953	-0.0844093	-0.112431	0.0262214	-0.117449	-0.490702	-0.226393	-0.105387	-0.129981	0.0427663	0.23841	-0.0488669	-0.138228	0.0220674	-0.0752537	0.0803094	-0.0113672	0.0434962	0.0268554	-0.0499992	-0.146448	-0.0615485	0.109631	-0.0952636	-0.216082	-0.0335257	0.0646442	-0.0723124	-0.00993983	-0.112181	0.1248	-0.0457097	0.0968866	-0.00664446	-0.00735518	-0.0918902	0.0733313	0.0299204	-0.0313249	0.152905	-0.0371528	0.17441	0.0444076	-0.030075	-0.125667
117	-0.197237	0.395252	0.0868578	0.17135	-0.035138	-0.134123	-0.0131941	0.244434	0.146954	0.211855	0.165509	0.302634	-0.0248899	-0.0231738	0.0811979	0.0113275	0.0168043	0.200141	-0.0934049	0.123569	0.065912	0.18186	0.0134532	0.154851	-0.20785	-0.074753	0.219831	-0.147311	0.094846	0.00421711	-0.0722349	-0.0914079	0.0324571	-0.0524703	-0.0511012	0.0785741	-0.0797196	0.0720869	0.0307052	0.0434401	-0.0626569	0.00393228	0.0663069	0.0472656	-0.106671	0.111743	-0.038389	-0.0541323	0.0678071
118	-0.26169	0.44572	0.198116	0.325704	-0.142995	-0.0958483	-0.239231	0.0970931	0.0384941	-0.326195	-0.0517026	0.143727	-0.11525	0.0843238	0.104223	-0.143622	0.0472182	0.0719294	-0.144334	0.0483948	-0.0901395	0.0333801	0.0152481	0.104841	0.114442	-0.262036	0.000723369	0.074664	0.090516	-0.0115978	0.0863126	0.0695797	0.0742897	0.184498	-0.0679203	0.185094	-0.173117	-0.0864056	0.0216735	-0.0497675	-0.179622	0.0405045	-0.165071	0.0493702	-0.0079301	0.0600087	0.0600756	-0.0180788	0.0367471
119	-0.216621	0.619296	-0.145047	-0.103256	-0.0974079	0.0849358	-0.228039	-0.398316	-0.130422	-0.511993	0.0768545	-0.0738448	0.175338	-0.0259008	-0.0223928	-0.150322	-0.238346	-0.0555309	-0.0965553	0.0345243	-0.0631925	-0.191541	-0.109062	-0.0612349	-0.093909	-0.0625915	0.141779	0.00948667	-0.146774	-0.039286	0.0117127	-0.00575251	0.0838472	-0.133105	-0.0132799	-0.0408679	-0.00956835	0.0716033	0.0435294	0.0270824	0.0372176	-0.0205855	0.0802791	-0.0518872	-0.1472	0.0260032	0.0474708	-0.0667647	-0.0579199
120	-0.137035	0.65239	-0.0620059	-0.134385	-0.210803	0.00872502	-0.260809	-0.0616836	-0.324597	-0.457342	0.176205	0.0072472	0.403492	0.168453	-0.0350947	0.108062	-0.0573493	0.0168368	0.140021	0.0641355	0.0742995	0.0835853	0.121244	-0.0299134	0.0211798	0.077437	-0.146874	0.0555847	-0.0947158	0.154325	0.0987483	0.0814692	-0.0105963	0.0243752	0.16809	-0.0302306	0.0642951	0.0657787	0.0318231	0.0274117	0.0522774	-0.0261759	-0.0735178	0.00912955	0.0712505	-0.0651726	-0.0720288	-0.0512455	0.0647009
121	0.0202448	0.550231	0.701897	0.113009	-0.24391	0.0827149	-0.0714148	-0.0574275	-0.294612	-0.0137134	-0.136328	0.0170065	-0.0168473	0.17214	0.120422	0.124007	-0.00602693	-0.268797	0.221068	0.131962	-0.0288283	0.0497482	-0.0751554	0.0225823	0.0887825	0.0578927	-0.0731438	0.0686169	0.0534251	0.112348	-0.164976	0.0511566	-0.000324112	-0.0386705	0.0963199	0.00911783	-0.0383253	0.0478823	-0.138312	-0.0558307	-0.0878594	-0.117314	-0.167405	-0.118311	0.0514866	-0.0593948	0.00999872	0.024181	0.0823652
122	-0.132294	0.614274	0.275908	0.209314	-0.246512	-0.0578378	0.0139144	0.0980948	-0.22559	-0.105129	-0.0735297	0.0487635	0.0982272	0.207169	-0.0930143	0.0837947	0.120983	0.0212435	0.00591764	0.0457783	0.0438073	0.192466	0.0188357	0.0579	-0.0144334	-0.0520734	-0.110992	0.0576373	-0.0415589	0.0699056	0.0988607	0.158346	0.0272293	0.141745	-0.0718963	0.0329904	-0.0515756	0.156513	0.142886	-0.055193	0.0694072	0.0232639	0.0716217	0.0967768	-0.0742126	-0.159801	-0.0893326	0.00470187	0.0786909
123	0.0329623	0.784626	0.199421	0.163601	-0.0881351	-0.0517631	-0.351891	-0.49019	0.0242724	-0.0186066	-0.302099	-0.350586	-0.223798	-0.186302	-0.139945	-0.038334	0.0492155	-0.161554	0.114202	-0.120791	-0.0612823	0.0239691	0.0103044	0.0336491	0.0402415	-0.134407	-0.167029	-0.173905	-0.00898494	0.0268331	-0.245541	0.063239	0.0421298	0.0850802	0.0483014	-0.051951	0.0295564	-0.108607	-0.140412	0.119255	0.0353269	-0.0189283	0.060436	-0.0288827	0.0402415	0.0238739	0.0504781	-0.0289589	-0.028438
124	-0.0997708	0.652895	0.515477	0.16956	-0.109574	0.0727866	-0.130246	-0.145355	0.054586	0.19187	0.0183055	-0.1306	0.014096	0.157004	-0.180631	0.177081	0.0215658	0.265344	0.15696	0.0695805	-0.00774721	0.255262	0.122015	0.136367	-0.0866638	-0.119476	0.0028727	0.0467776	0.116658	-0.0382213	-0.04685	-0.0451595	-0.0454446	-0.0104738	-0.0317548	0.0088473	-0.00221192	-0.0931521	0.0664023	-0.065437	-0.0288801	-0.0762722	0.0256787	-0.0132899	0.00475456	0.0150509	0.0668037	-0.0239103	0.00832143
125	0.0996437	0.378615	0.495592	0.105587	-0.0501767	-0.0781364	0.0700326	-0.0662368	0.0952461	0.363241	0.218516	0.05455	0.0665747	0.156986	-0.209775	0.0558562	0.0717276	0.112839	0.102103	0.138337	0.0547437	0.105858	0.0291606	-0.00446529	-0.148064	0.0463357	0.110958	-0.104656	0.0767679	0.0338517	0.0270219	-0.0645763	-0.0516741	-0.0714122	-0.0126249	0.0919703	0.0590231	0.0609889	-0.00536993	-0.029452	0.107042	-0.0572055	-0.0541164	-0.109074	-0.0408062	-0.06315	0.0077439	-0.028024	-0.0746834
126	-0.0232799	0.58565	0.551306	0.119881	-0.093158	-0.0383413	0.00679021	-0.367858	0.0119894	0.23768	0.0965449	-0.00117449	0.0859367	0.0318556	-0.375069	-0.0274774	0.205812	-0.065482	-0.0138934	-0.0505614	-0.0388352	-0.106228	-0.144388	-0.0758893	-0.0166201	0.0938085	0.094834	-0.111363	0.0273184	-0.0541337	-0.074708	0.0591014	-0.0149338	0.0699849	-0.100007	-0.0269191	0.0161693	-0.0481139	-0.0504375	0.0158207	0.0790349	0.00688825	-0.0344516	0.0166749	-0.0188385	0.0295782	-0.130932	0.0767614	-0.0228517
127	0.124293	0.408193	0.487618	-0.0507901	-0.0588249	0.0798148	0.141834	-0.271841	-0.0911655	0.295365	0.167895	0.0753108	0.129171	-0.0181429	-0.269624	-0.00224208	0.123833	-0.0223615	-0.00824281	-0.0526104	-0.137168	-0.186622	-0.137722	-0.134021	0.284461	0.280694	-0.00936658	-0.0517174	0.0964449	0.0858406	-0.00626201	-0.0429021	0.0770928	0.0505909	-0.0933065	-0.161104	0.135967	-0.0931062	0.0389884	-0.031327	-0.0216808	-0.0945744	0.111367	-0.0705467	-0.122212	-0.0284859	0.0112146	-0.0308659	-0.0278366
128	-0.290194	0.150884	0.314836	0.120665	0.219103	-0.0437427	-0.379538	-0.0787752	0.12606	-0.00161867	0.131992	0.192133	-0.00425861	0.183703	0.0307696	-0.104993	-0.206429	0.252285	-0.0658275	0.155219	-0.0866116	-0.0533615	0.15174	-0.148002	-0.168	0.0492942	0.090561	-0.122587	0.111589	0.0536743	-0.272449	-0.163472	0.123335	-0.0903957	0.060858	-0.0473366	0.0844693	-0.322922	0.0856842	-0.0612161	-0.0191109	-0.0269843	0.00615447	-0.0304671	0.0362933	-0.04845	0.0908984	0.0598831	-0.0943889
[truncated: 76 more columns]

## Sheet: AFP (4)
Allele Frequencies by Population for Codominant Data
Data Sheet	D (2)
Data Title	fst 3pop
No. Loci	12
No. Samples	128
No. Pops.	3
Allele Frequencies and Sample Size by Populations
Locus	Allele/n	Pop1	Pop2	Pop3
Locus1	N	41	54	29
	232	0.18293	0.12963	0.22414
	237	0	0.07407	0.03448
	239	0.0122	0.12037	0
	241	0.2561	0.01852	0
	243	0	0.37963	0.01724
	245	0.12195	0.00926	0.31034
	247	0.02439	0.01852	0
	249	0.14634	0.06481	0.36207
	251	0.12195	0.00926	0.01724
	253	0	0.15741	0.03448
	255	0.13415	0.00926	0
	257	0	0.00926	0
Locus2	N	41	54	33
	194	0	0.02778	0
	198	0.03659	0.24074	0.01515
	200	0.06098	0.01852	0.62121
	202	0.07317	0.2963	0
	204	0.09756	0.0463	0.01515
	206	0.03659	0.2037	0
	208	0.4878	0.11111	0.24242
	210	0.04878	0.02778	0.10606
	212	0	0.00926	0
	214	0.13415	0.01852	0
	220	0.02439	0	0
Locus3	N	38	53	26
	162	0	0.16038	0.07692
	164	0.11842	0	0
	166	0	0.0283	0
	172	0	0.16981	0
	174	0.26316	0	0.11538
	178	0.13158	0.00943	0.15385
	180	0	0.00943	0
	182	0.03947	0.14151	0.01923
	184	0.06579	0.07547	0
	185	0	0.00943	0
	186	0.14474	0.08491	0.15385
	188	0.02632	0.00943	0.01923
	192	0	0.00943	0.25
	194	0.02632	0.13208	0
	196	0.06579	0.01887	0
	198	0.03947	0.01887	0.05769
	204	0.02632	0.01887	0.07692
	206	0	0.08491	0.05769
	208	0.03947	0.00943	0
	210	0.01316	0.00943	0.01923
Locus4	N	39	53	29
	110	0	0.00943	0
	113	0	0.00943	0
	118	0	0.04717	0
	120	0.25641	0.56604	0.63793
	122	0.17949	0.09434	0.22414
	124	0.02564	0.10377	0
	126	0	0.00943	0
	130	0.20513	0.0566	0
	132	0.07692	0	0
	140	0	0.03774	0.13793
	142	0.07692	0	0
	144	0	0.00943	0
	156	0.17949	0.0566	0
Locus5	N	41	54	26
	246	0.34146	0.49074	0.92308
	251	0	0.03704	0
	257	0	0.05556	0
	259	0.2439	0	0
	262	0	0.00926	0
	266	0	0.26852	0.07692
	268	0.37805	0	0
	269	0.03659	0.09259	0
	271	0	0.03704	0
	275	0	0.00926	0
Locus6	N	41	54	25
	120	0	0.00926	0
	124	0	0.02778	0.5
	126	0.23171	0.08333	0.18
	138	0.0122	0	0
	140	0	0	0.04
	144	0	0.0463	0
	146	0	0.06481	0
	148	0.09756	0.00926	0
	150	0.0122	0.34259	0
	152	0.20732	0	0
	154	0.0122	0.07407	0.18
	156	0.0122	0.06481	0.08
	160	0.0122	0.02778	0
	162	0	0.00926	0
	165	0.0122	0.01852	0
	167	0.0122	0	0
	170	0	0.03704	0
	172	0.02439	0.02778	0
	174	0.03659	0.07407	0
	176	0.09756	0.08333	0.02
	180	0.07317	0	0
	181	0.03659	0	0
	185	0.07317	0	0
	187	0.0122	0	0
	191	0.02439	0	0
Locus7	N	29	54	32
	107	0	0.01852	0
	109	0.01724	0.06481	0
	111	0.03448	0	0
	113	0	0.10185	0
	115	0.5	0.30556	0
	117	0.32759	0.14815	0.54688
	119	0.03448	0	0
	123	0.01724	0	0
	129	0.03448	0.05556	0
	139	0.03448	0	0
	143	0	0.21296	0.03125
	155	0	0	0.01563
	157	0	0	0.04688
	159	0	0	0.0625
	161	0	0	0.01563
	165	0	0.01852	0
	169	0	0	0.01563
	171	0	0	0.04688
	175	0	0.00926	0
	179	0	0.00926	0.01563
	181	0	0	0.1875
	185	0	0.05556	0
	189	0	0	0.01563
Locus8	N	40	54	32
	116	0	0	0.21875
	142	0	0	0.03125
	159	0	0.01852	0.03125
	160	0	0	0.01563
	163	0	0.01852	0
	165	0	0.00926	0
	169	0.0125	0.00926	0.01563
	171	0.025	0.13889	0.14063
	173	0.0125	0.12963	0.0625
	175	0.2375	0.0463	0.04688
	177	0.1	0.28704	0.28125
	179	0.3	0.12037	0.14063
	181	0.0875	0.11111	0
	185	0.025	0.07407	0
	187	0.1875	0.01852	0
	188	0	0	0.01563
	191	0	0.00926	0
	201	0	0.00926	0
	207	0.0125	0	0
Locus9	N	41	51	26
	170	0.0122	0.0098	0.01923
	172	0	0.07843	0.01923
	174	0.04878	0.08824	0.07692
	176	0.20732	0.30392	0
	178	0.06098	0	0
	180	0.0122	0.01961	0
	182	0.13415	0.02941	0
	188	0	0.03922	0
	190	0.12195	0	0
	192	0.02439	0	0
	196	0.0122	0	0
	198	0.03659	0.06863	0
	204	0	0	0.03846
	206	0	0	0.05769
	208	0	0.0098	0.03846
	210	0	0.12745	0
	212	0.02439	0	0.01923
	214	0.02439	0	0.26923
	216	0	0.21569	0.42308
	218	0.06098	0.0098	0.03846
	220	0.02439	0	0
	222	0.19512	0	0
Locus10	N	41	54	21
	180	0.02439	0	0
	182	0.15854	0.18519	0.35714
	184	0.0122	0	0
	190	0.43902	0.0463	0.09524
	191	0	0.03704	0
	192	0.03659	0.13889	0.21429
	193	0	0.03704	0.09524
	198	0.06098	0.24074	0.16667
	199	0	0.03704	0
	200	0.18293	0.07407	0.04762
	203	0	0.00926	0.02381
	206	0.03659	0.10185	0
	207	0.0122	0	0
	218	0	0.09259	0
	219	0.03659	0	0
Locus11	N	37	53	26
	192	0	0.23585	0.40385
	194	0.08108	0.00943	0.01923
	196	0.01351	0.00943	0.01923
	198	0.04054	0.58491	0.53846
	200	0.58108	0.11321	0.01923
	202	0.14865	0	0
	204	0.02703	0.01887	0
	206	0.08108	0.00943	0
	212	0.01351	0	0
	214	0	0.01887	0
	216	0.01351	0	0
Locus12	N	41	54	21
	182	0	0.37963	0
	186	0	0.01852	0.30952
	188	0	0.01852	0.33333
	190	0.19512	0.12963	0.02381
	192	0.67073	0	0.04762
	194	0.02439	0.32407	0.07143
	196	0	0.01852	0.02381
	198	0.10976	0.11111	0.16667
	202	0	0	0.02381
Warning! Results should be treated with caution given the following:
There is 12% missing data at the locus 'Locus1' in the population 'Pop3!
There is 7% missing data at the locus 'Locus3' in the population 'Pop1!
There is 21% missing data at the locus 'Locus3' in the population 'Pop3!
There is 12% missing data at the locus 'Locus4' in the population 'Pop3!
There is 21% missing data at the locus 'Locus5' in the population 'Pop3!
There is 24% missing data at the locus 'Locus6' in the population 'Pop3!
There is 29% missing data at the locus 'Locus7' in the population 'Pop1!
There is 21% missing data at the locus 'Locus9' in the population 'Pop3!
There is 36% missing data at the locus 'Locus10' in the population 'Pop3!
There is 9% missing data at the locus 'Locus11' in the population 'Pop1!
There is 21% missing data at the locus 'Locus11' in the population 'Pop3!
There is 36% missing data at the locus 'Locus12' in the population 'Pop3!

## Sheet: HFP (2)
Heterozygosity, Fstatistics and Polymorphism by Population for Codominant Data
Data Sheet	D (2)
Data Title	fst 3pop
No. Loci	12
No. Samples	128
No. Pops.	3
Sample Size, No. Alleles, No. Effective Alleles, Information Index, Observed Heterozygosity, Expected and Unbiased Expected Heterozygosity, and Fixation Index
Pop	Locus	N	Na	Ne	I	Ho	He	uHe	F		ho tolto due loci con nulli >20
Pop1	Locus1	41	8	5.91901	1.86782	0.878049	0.831053	0.841313	-0.0565497
	Locus2	41	9	3.569	1.68857	0.731707	0.71981	0.728696	-0.0165289
	Locus3	38	13	7.29293	2.23556	0.868421	0.862881	0.874386	-0.00642055
	Locus4	39	7	5.41281	1.77905	0.846154	0.815253	0.825841	-0.0379032
	Locus6	41	18	7.60633	2.35495	0.95122	0.868531	0.879253	-0.0952055
	Locus8	40	10	4.97667	1.80868	0.85	0.799063	0.809177	-0.0637466
	Locus9	41	15	7.8186	2.30417	0.878049	0.8721	0.882867	-0.00682128
	Locus10	41	10	3.84668	1.69583	0.682927	0.740036	0.749172	0.0771704
	Locus12	41	4	1.99762	0.919816	0.560976	0.499405	0.505571	-0.123288		-0.0365881
		40.3333	10.4444	5.38219	1.85049	0.805278	0.778681	0.788475	-0.0365881
Pop2	Locus1	54	12	4.74146	1.86971	0.833333	0.789095	0.796469	-0.0560626
	Locus2	54	10	4.90084	1.80392	0.740741	0.795953	0.803392	0.0693667
	Locus3	53	18	8.7236	2.38609	0.698113	0.885368	0.893801	0.2115
	Locus4	53	11	2.85322	1.54875	0.54717	0.649519	0.655705	0.157577
	Locus6	54	16	6.36681	2.2883	0.888889	0.842936	0.850813	-0.0545159
	Locus8	54	14	6.48	2.12634	0.796296	0.845679	0.853583	0.0583942
	Locus9	51	12	5.65435	1.99693	0.901961	0.823145	0.831295	-0.0957496
	Locus10	54	11	7.02651	2.12688	0.833333	0.857682	0.865697	0.0283886
	Locus12	54	7	3.58011	1.46344	0.703704	0.720679	0.727414	0.0235546
		53.4444	12.3333	5.59188	1.95671	0.771504	0.801117	0.808686	0.0380504		0.0380504
Pop3	Locus1	29	7	3.56356	1.4384	0.931034	0.719382	0.732002	-0.294215
	Locus2	33	5	2.19115	1.00421	0.69697	0.543618	0.551981	-0.282095
	Locus3	26	11	7.00518	2.1234	1	0.857249	0.874057	-0.166523
	Locus4	29	3	2.09988	0.895204	0.310345	0.523781	0.53297	0.407491
	Locus6	25	6	3.09406	1.37295	0.72	0.6768	0.690612	-0.0638298
	Locus8	32	11	5.70474	1.96924	0.75	0.824707	0.837798	0.0905861
	Locus9	26	10	3.75556	1.68298	0.961538	0.733728	0.748115	-0.310484
	Locus10	21	7	4.5	1.67829	0.714286	0.777778	0.796748	0.0816327
	Locus12	21	8	4.10233	1.62827	0.857143	0.756236	0.774681	-0.133433
		26.8889	7.55556	4.00183	1.53255	0.771257	0.712586	0.726552	-0.074541		-0.074541
Mean and SE over Loci for each Pop
Pop		N	Na	Ne	I	Ho	He	uHe	F
Pop1	Mean	39.1667	9.58333	4.74829	1.71493	0.654506	0.745775	0.755464	0.14357
	SE	1.00629	1.18997	0.594621	0.129552	0.084729	0.0339342	0.0342844	0.0962833
Pop2	Mean	53.5	11.5	5.10805	1.84562	0.725874	0.774062	0.781366	0.0648735
	SE	0.261116	0.941469	0.548075	0.108005	0.0427621	0.0271636	0.0274192	0.0429954
Pop3	Mean	27.1667	7.16667	3.52373	1.37741	0.700639	0.646368	0.658833	-0.0758443
	SE	1.14702	0.903137	0.475972	0.150275	0.0749926	0.0557079	0.056884	0.0612751
Grand Mean and SE over Loci and Pops
		N	Na	Ne	I	Ho	He	uHe	F
Total	Mean	39.9444	9.41667	4.46002	1.64599	0.693673	0.722069	0.731888	0.0441998
	SE	1.88728	0.645344	0.324629	0.0803614	0.0394686	0.0246724	0.0249063	0.0423504
F-Statistics and Estimates of Nm over All Pops for each Locus
All Pops.	Locus	Fis	Fit	Fst		Nm
	Locus1	-0.129465	-0.010514	0.105316		2.1238
	Locus2	-0.053432	0.124997	0.169379		1.22598
	Locus3	0.0149544	0.0731273	0.0590561		3.98326
	Locus4	0.143263	0.205509	0.0726557		3.19089
	Locus5	0.294873	0.433009	0.195903		1.02614
	Locus6	-0.0719527	0.0541619	0.117649		1.87496
	Locus7	0.228582	0.318631	0.116732		1.89166
	Locus8	0.0296229	0.0841104	0.0561509		4.20229
	Locus9	-0.128686	-0.0214656	0.0949959		2.38169
	Locus10	0.0610186	0.126001	0.0692057		3.36242
	Locus11	0.341293	0.479793	0.210261		0.939001
	Locus12	-0.0736228	0.168793	0.225792		0.857214
	Mean	0.054704	0.169679	0.124425		2.25494
	SE	0.0470246	0.0470238	0.0175751		0.342068
Percentage of Polymorphic Loci
Population	%P
Pop1	1
Pop2	1
Pop3	1
Mean	1
SE	0
Na = No. of Different Alleles
Ne = No. of Effective Alleles = 1 / (Sum pi^2)
I = Shannon's Information Index = -1* Sum (pi * Ln (pi))
Ho = Observed Heterozygosity = No. of Hets / N
He = Expected Heterozygosity = 1 - Sum pi^2
uHe = Unbiased Expected Heterozygosity = (2N / (2N-1)) * He
F = Fixation Index = (He - Ho) / He = 1 - (Ho / He)
Where pi is the frequency of the ith allele for the population & Sum pi^2 is the sum of the squared population allele frequencies.
Fis = (Mean He - Mean Ho) / Mean He
Fit = (Ht - Mean Ho) / Ht
Fst = (Ht - Mean He) / Ht
Nm = [(1 / Fst) - 1] / 4
Key: Mean He = Average He across the populations. Mean Ho = Average Ho across the populations.
Ht = Total Expected Heterozygosity = 1 - Sum tpi^2 where tpi is the frequency of the ith allele for the total & Sum tpi^2 is the sum of the squared total allele frequencies.
Tip: Choose the Step by Step option to show Mean He, Mean Ho and Ht values.
Note:
Warning! Results should be treated with caution given the following:
There is 12% missing data at the locus 'Locus1' in the population 'Pop3!
There is 7% missing data at the locus 'Locus3' in the population 'Pop1!
There is 21% missing data at the locus 'Locus3' in the population 'Pop3!
There is 12% missing data at the locus 'Locus4' in the population 'Pop3!
There is 21% missing data at the locus 'Locus5' in the population 'Pop3!
There is 24% missing data at the locus 'Locus6' in the population 'Pop3!
There is 29% missing data at the locus 'Locus7' in the population 'Pop1!
There is 21% missing data at the locus 'Locus9' in the population 'Pop3!
There is 36% missing data at the locus 'Locus10' in the population 'Pop3!
There is 9% missing data at the locus 'Locus11' in the population 'Pop1!
There is 21% missing data at the locus 'Locus11' in the population 'Pop3!
There is 36% missing data at the locus 'Locus12' in the population 'Pop3!

## Sheet: HFL (4)
Heterozygosity, Fstatistics and Polymorphism by Locus for Codominant Data
Data Sheet	D (2)
Data Title	fst 3pop
No. Loci	12
No. Samples	128
No. Pops.	3
Sample Size, No. Alleles, No. Effective Alleles, Information Index, Observed Heterozygosity, Expected and Unbiased Expected Heterozygosity, and Fixation Index
Pop		Locus1	Locus2	Locus3	Locus4	Locus5	Locus6	Locus7	Locus8	Locus9	Locus10	Locus11	Locus12
Pop1	N	41	41	38	39	41	41	29	40	41	41	37	41
	Na	8	9	13	7	4	18	8	10	15	10	9	4
	Ne	5.91901	3.569	7.29293	5.41281	3.12163	7.60633	2.75738	4.97667	7.8186	3.84668	2.66084	1.99762
	I	1.86782	1.68857	2.23556	1.77905	1.19982	2.35495	1.31663	1.80868	2.30417	1.69583	1.40823	0.919816
	Ho	0.878049	0.731707	0.868421	0.846154	0.121951	0.95122	0.241379	0.85	0.878049	0.682927	0.243243	0.560976
	He	0.831053	0.71981	0.862881	0.815253	0.679655	0.868531	0.637337	0.799063	0.8721	0.740036	0.624178	0.499405
	uHe	0.841313	0.728696	0.874386	0.825841	0.688046	0.879253	0.648518	0.809177	0.882867	0.749172	0.632729	0.505571
	F	-0.0565497	-0.0165289	-0.00642055	-0.0379032	0.820569	-0.0952055	0.621269	-0.0637466	-0.00682128	0.0771704	0.610298	-0.123288
Pop2	N	54	54	53	53	54	54	54	54	51	54	53	54
	Na	12	10	18	11	8	16	11	14	12	11	8	7
	Ne	4.74146	4.90084	8.7236	2.85322	3.0534	6.36681	5.48636	6.48	5.65435	7.02651	2.42993	3.58011
	I	1.86971	1.80392	2.38609	1.54875	1.41413	2.2883	1.94015	2.12634	1.99693	2.12688	1.18282	1.46344
	Ho	0.833333	0.740741	0.698113	0.54717	0.777778	0.888889	0.574074	0.796296	0.901961	0.833333	0.415094	0.703704
	He	0.789095	0.795953	0.885368	0.649519	0.672497	0.842936	0.81773	0.845679	0.823145	0.857682	0.588466	0.720679
	uHe	0.796469	0.803392	0.893801	0.655705	0.678782	0.850813	0.825372	0.853583	0.831295	0.865697	0.59407	0.727414
	F	-0.0560626	0.0693667	0.2115	0.157577	-0.156553	-0.0545159	0.297966	0.0583942	-0.0957496	0.0283886	0.294616	0.0235546
Pop3	N	29	33	26	29	26	25	32	32	26	21	26	21
	Na	7	5	11	3	2	6	11	11	10	7	5	8
	Ne	3.56356	2.19115	7.00518	2.09988	1.16552	3.09406	2.90085	5.70474	3.75556	4.5	2.20195	4.10233
	I	1.4384	1.00421	2.1234	0.895204	0.271189	1.37295	1.53733	1.96924	1.68298	1.67829	0.927461	1.62827
	Ho	0.931034	0.69697	1	0.310345	0.153846	0.72	0.8125	0.75	0.961538	0.714286	0.5	0.857143
	He	0.719382	0.543618	0.857249	0.523781	0.142012	0.6768	0.655273	0.824707	0.733728	0.777778	0.545858	0.756236
	uHe	0.732002	0.551981	0.874057	0.53297	0.144796	0.690612	0.665675	0.837798	0.748115	0.796748	0.556561	0.774681
	F	-0.294215	-0.282095	-0.166523	0.407491	-0.0833333	-0.0638298	-0.23994	0.0905861	-0.310484	0.0816327	0.0840108	-0.133433
Mean and SE over Pops for each Locus
		Locus1	Locus2	Locus3	Locus4	Locus5	Locus6	Locus7	Locus8	Locus9	Locus10	Locus11	Locus12
N	Mean	41.3333	42.6667	39	40.3333	40.3333	40	38.3333	42	39.3333	38.6667	38.6667	38.6667
	SE	7.2188	6.11919	7.81025	6.9602	8.08977	8.3865	7.88106	6.4291	7.26483	9.59745	7.83865	9.59745
Na	Mean	9	8	14	7	4.66667	13.3333	10	11.6667	12.3333	9.33333	7.33333	6.33333
	SE	1.52753	1.52753	2.08167	2.3094	1.76383	3.71184	1	1.20185	1.45297	1.20185	1.20185	1.20185
Ne	Mean	4.74135	3.55366	7.6739	3.4553	2.44685	5.68907	3.71486	5.72047	5.74284	5.1244	2.43091	3.22669
	SE	0.679961	0.782259	0.531382	1.00262	0.64097	1.34594	0.886716	0.434045	1.17374	0.969574	0.132469	0.632752
I	Mean	1.72531	1.4989	2.24835	1.40767	0.961714	2.0054	1.59804	1.96808	1.99469	1.83367	1.17284	1.33718
	SE	0.143457	0.249575	0.0761014	0.264717	0.350761	0.316807	0.182534	0.0917015	0.179324	0.146694	0.138876	0.214037
Ho	Mean	0.880806	0.723139	0.855511	0.567889	0.351192	0.853369	0.542651	0.798765	0.913849	0.743515	0.386113	0.707274
	SE	0.0282376	0.0133421	0.0873859	0.155021	0.213492	0.0690696	0.165615	0.0288939	0.0248236	0.0458123	0.0755226	0.0855148
He	Mean	0.779843	0.68646	0.868499	0.662851	0.498054	0.796089	0.703447	0.82315	0.809658	0.791832	0.586167	0.658773
	SE	0.0325669	0.0747271	0.00858987	0.0844043	0.178033	0.0601003	0.0573757	0.0134795	0.0405098	0.0346809	0.0226383	0.0803425
uHe	Mean	0.789928	0.69469	0.880748	0.671505	0.503875	0.806893	0.713188	0.833519	0.820759	0.803872	0.594453	0.669222
	SE	0.0317242	0.0745412	0.00652699	0.0849127	0.179559	0.0587171	0.0563102	0.012996	0.0392546	0.0338261	0.0219885	0.0829555
F	Mean	-0.135609	-0.076419	0.0128521	0.175722	0.193561	-0.0711837	0.226431	0.0284112	-0.137685	0.0623972	0.329642	-0.0777221
	SE	0.079303	0.105785	0.10955	0.128894	0.314216	0.0123081	0.251169	0.0470067	0.0901326	0.017053	0.152932	0.050723
Grand Mean and SE over Pops and Loci
		Total
N	Mean	39.9444
	SE	1.88728
Na	Mean	9.41667
	SE	0.645344
Ne	Mean	4.46002
	SE	0.324629
I	Mean	1.64599
	SE	0.0803614
Ho	Mean	0.693673
	SE	0.0394686
He	Mean	0.722069
	SE	0.0246724
uHe	Mean	0.731888
	SE	0.0249063
F	Mean	0.0441998
	SE	0.0423504
F-Statistics and Estimates of Nm over All Pops for each Locus
All Pops.		Locus1	Locus2	Locus3	Locus4	Locus5	Locus6	Locus7	Locus8	Locus9	Locus10	Locus11	Locus12	Mean	SE
	Fis	-0.129465	-0.053432	0.0149544	0.143263	0.294873	-0.0719527	0.228582	0.0296229	-0.128686	0.0610186	0.341293	-0.0736228	0.054704	0.0470246
	Fit	-0.010514	0.124997	0.0731273	0.205509	0.433009	0.0541619	0.318631	0.0841104	-0.0214656	0.126001	0.479793	0.168793	0.169679	0.0470238
	Fst	0.105316	0.169379	0.0590561	0.0726557	0.195903	0.117649	0.116732	0.0561509	0.0949959	0.0692057	0.210261	0.225792	0.124425	0.0175751
	Nm	2.1238	1.22598	3.98326	3.19089	1.02614	1.87496	1.89166	4.20229	2.38169	3.36242	0.939001	0.857214	2.25494	0.342068
Percentage of Polymorphic Loci
Population	%P
Pop1	1
Pop2	1
Pop3	1
Mean	1
SE	0
Na = No. of Different Alleles
Ne = No. of Effective Alleles = 1 / (Sum pi^2)
I = Shannon's Information Index = -1* Sum (pi * Ln (pi))
Ho = Observed Heterozygosity = No. of Hets / N
He = Expected Heterozygosity = 1 - Sum pi^2
uHe = Unbiased Expected Heterozygosity = (2N / (2N-1)) * He
F = Fixation Index = (He - Ho) / He = 1 - (Ho / He)
Where pi is the frequency of the ith allele for the population & Sum pi^2 is the sum of the squared population allele frequencies.
Fis = (Mean He - Mean Ho) / Mean He
Fit = (Ht - Mean Ho) / Ht
Fst = (Ht - Mean He) / Ht
Nm = [(1 / Fst) - 1] / 4
Key: Mean He = Average He across the populations. Mean Ho = Average Ho across the populations.
Ht = Total Expected Heterozygosity = 1 - Sum tpi^2 where tpi is the frequency of the ith allele for the total & Sum tpi^2 is the sum of the squared total allele frequencies.
Tip: Choose the Step by Step option to show Mean He, Mean Ho and Ht values.
Note:
Warning! Results should be treated with caution given the following:
There is 12% missing data at the locus 'Locus1' in the population 'Pop3!
There is 7% missing data at the locus 'Locus3' in the population 'Pop1!
There is 21% missing data at the locus 'Locus3' in the population 'Pop3!
There is 12% missing data at the locus 'Locus4' in the population 'Pop3!
There is 21% missing data at the locus 'Locus5' in the population 'Pop3!
There is 24% missing data at the locus 'Locus6' in the population 'Pop3!
There is 29% missing data at the locus 'Locus7' in the population 'Pop1!
There is 21% missing data at the locus 'Locus9' in the population 'Pop3!
There is 36% missing data at the locus 'Locus10' in the population 'Pop3!
There is 9% missing data at the locus 'Locus11' in the population 'Pop1!
There is 21% missing data at the locus 'Locus11' in the population 'Pop3!
There is 36% missing data at the locus 'Locus12' in the population 'Pop3!

## Sheet: PAS
Summary of Private Alleles by Population
Data Sheet	D (2)
Data Title	fst 3pop
No. Loci	12
No. Samples	128
No. Pops.	3
Pop	Locus	Allele	Freq		POP 1	POP 2	POP 3
Pop1	Locus2	220	0.0243902		32	38	16
Pop1	Locus3	164	0.118421
Pop1	Locus4	132	0.0769231
Pop1	Locus4	142	0.0769231
Pop1	Locus5	259	0.243902
Pop1	Locus5	268	0.378049
Pop1	Locus6	138	0.0121951
Pop1	Locus6	152	0.207317
Pop1	Locus6	167	0.0121951
Pop1	Locus6	180	0.0731707
Pop1	Locus6	181	0.0365854
Pop1	Locus6	185	0.0731707
Pop1	Locus6	187	0.0121951
Pop1	Locus6	191	0.0243902
Pop1	Locus7	111	0.0344828
Pop1	Locus7	119	0.0344828
Pop1	Locus7	123	0.0172414
Pop1	Locus7	139	0.0344828
Pop1	Locus8	207	0.0125
Pop1	Locus9	178	0.0609756
Pop1	Locus9	190	0.121951
Pop1	Locus9	192	0.0243902
Pop1	Locus9	196	0.0121951
Pop1	Locus9	220	0.0243902
Pop1	Locus9	222	0.195122
Pop1	Locus10	180	0.0243902
Pop1	Locus10	184	0.0121951
Pop1	Locus10	207	0.0121951
Pop1	Locus10	219	0.0365854
Pop1	Locus11	202	0.148649
Pop1	Locus11	212	0.0135135
Pop1	Locus11	216	0.0135135
Pop2	Locus1	257	0.00925926
Pop2	Locus2	194	0.0277778
Pop2	Locus2	212	0.00925926
Pop2	Locus3	166	0.0283019
Pop2	Locus3	172	0.169811
Pop2	Locus3	180	0.00943396
Pop2	Locus3	185	0.00943396
Pop2	Locus4	110	0.00943396
Pop2	Locus4	113	0.00943396
Pop2	Locus4	118	0.0471698
Pop2	Locus4	126	0.00943396
Pop2	Locus4	144	0.00943396
Pop2	Locus5	251	0.037037
Pop2	Locus5	257	0.0555556
Pop2	Locus5	262	0.00925926
Pop2	Locus5	271	0.037037
Pop2	Locus5	275	0.00925926
Pop2	Locus6	120	0.00925926
Pop2	Locus6	144	0.0462963
Pop2	Locus6	146	0.0648148
Pop2	Locus6	162	0.00925926
Pop2	Locus6	170	0.037037
Pop2	Locus7	107	0.0185185
Pop2	Locus7	113	0.101852
Pop2	Locus7	165	0.0185185
Pop2	Locus7	175	0.00925926
Pop2	Locus7	185	0.0555556
Pop2	Locus8	163	0.0185185
Pop2	Locus8	165	0.00925926
Pop2	Locus8	191	0.00925926
Pop2	Locus8	201	0.00925926
Pop2	Locus9	188	0.0392157
Pop2	Locus9	210	0.127451
Pop2	Locus10	191	0.037037
Pop2	Locus10	199	0.037037
Pop2	Locus10	218	0.0925926
Pop2	Locus11	214	0.0188679
Pop2	Locus12	182	0.37963
Pop3	Locus6	140	0.04
Pop3	Locus7	155	0.015625
Pop3	Locus7	157	0.046875
Pop3	Locus7	159	0.0625
Pop3	Locus7	161	0.015625
Pop3	Locus7	169	0.015625
Pop3	Locus7	171	0.046875
Pop3	Locus7	181	0.1875
Pop3	Locus7	189	0.015625
Pop3	Locus8	116	0.21875
Pop3	Locus8	142	0.03125
Pop3	Locus8	160	0.015625
Pop3	Locus8	188	0.015625
Pop3	Locus9	204	0.0384615
Pop3	Locus9	206	0.0576923
Pop3	Locus12	202	0.0238095

[truncated: 17 more sheets: PAL, FstP, FstL, FstT, HW, HWS per 4 pop, Fst (2), AFP (3), AFL, HFP, HFL (3), AFP (2), HFL (2), AFP, rp, HFL, Fst]
